# Supplementary material for: para-Chlorotetrafluorophenyl-boranes – syntheses and structures of a series of mono- and bidentate Lewis acids
Source: Royal Society of Chemistry journal article supplement (doi:10.1039/d2dt00586g), 2022-01-01
Supplement: d2dt00586g1.pdf [file d2dt00586g1.pdf]

## Supporting Information

### Contents

|                                                                                                                                                                                             |    |
|---------------------------------------------------------------------------------------------------------------------------------------------------------------------------------------------|----|
| Vessel for the synthesis of 4-chloro-2,3,5,6-tetrafluoroaniline (1) .....                                                                                                                   | 2  |
| NMR Spectra.....                                                                                                                                                                            | 2  |
| 4-Chloro-2,3,5,6-tetrafluoroaniline (1) .....                                                                                                                                               | 2  |
| 4-Chloro-2,3,5,6-tetrafluorobromobenzene (2) .....                                                                                                                                          | 4  |
| 4-Chloro-2,3,5,6-tetrafluoroiodobenzene (3) .....                                                                                                                                           | 6  |
| Bis( <i>para</i> -chlorotetrafluorophenyl)dimethylstannane (4) .....                                                                                                                        | 8  |
| Bis( <i>para</i> -chlorotetrafluorophenyl)chloroborane (5) .....                                                                                                                            | 11 |
| Reaction mixtures of the hydroborations of Ph-CH=CH <sub>2</sub> , Ph-C≡CH, TMS-CH=CH <sub>2</sub> and<br>TMS-C≡CH with bis( <i>para</i> -chlorotetrafluorophenyl)hydridoborane (6) .....   | 14 |
| Tris( <i>para</i> -chlorotetrafluorophenyl)borane (7).....                                                                                                                                  | 16 |
| 2,2,6,6-Tetramethylpiperidinium tris( <i>para</i> -chlorotetrafluorophenyl)hydrido-boranate ([7-<br>H][H-TMP]) .....                                                                        | 18 |
| 1,2-Bis(bis( <i>para</i> -chlorotetrafluorophenyl)boryl)benzene (8).....                                                                                                                    | 21 |
| 1,8-Bis(dichloroboryl)naphthalene.....                                                                                                                                                      | 23 |
| 1,2-Bis(bis( <i>para</i> -chlorotetrafluorophenyl)boryl)naphthalene (9).....                                                                                                                | 25 |
| UV/Vis and IR spectra of tris ( <i>para</i> -chlorotetrafluorophenyl)borane (7).....                                                                                                        | 28 |
| Data of the Gutmann Beckett tests .....                                                                                                                                                     | 29 |
| Crystallographic Details.....                                                                                                                                                               | 31 |
| Quantum-chemical calculation of the hydride and fluoride ion affinities .....                                                                                                               | 36 |
| Selected distances and angles of the calculated ions [7-H] <sup>-</sup> , [7-F] <sup>-</sup> , [8-H] <sup>-</sup> , [8-F] <sup>-</sup> , [9-H] <sup>-</sup> and<br>[9-F] <sup>-</sup> ..... | 91 |

## Vessel for the synthesis of 4-chloro-2,3,5,6-tetrafluoroaniline (1)

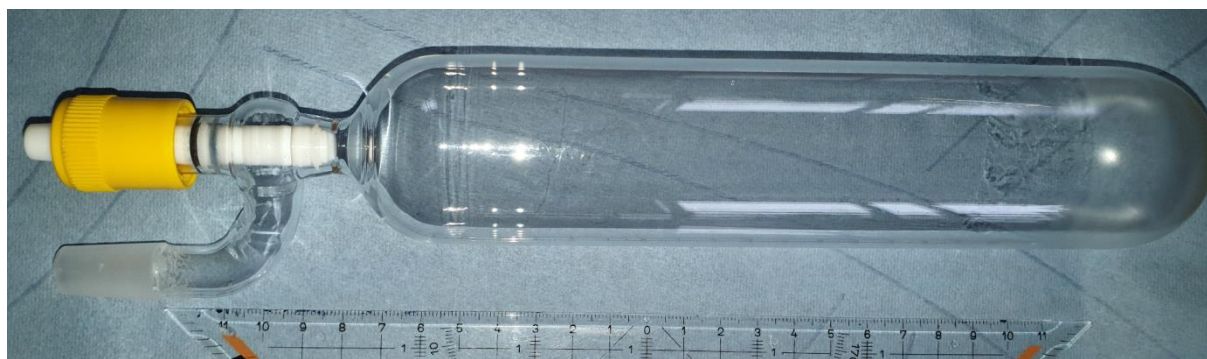

**Figure S1.** Photography of a reaction vessel similar to the one used for the synthesis of 4-Chloro-2,3,5,6-tetrafluoroaniline (1). Scale in cm. Additionally, the vessel must be surrounded by a burst protection (e.g. by placing it in a metallic container completely surrounded by non-flammable cloth) before warming up the reaction mixture above the boiling point of ammonia to prevent injuries in the event of an explosion (which we never encountered during this study).

## NMR Spectra

### 4-Chloro-2,3,5,6-tetrafluoroaniline (1)

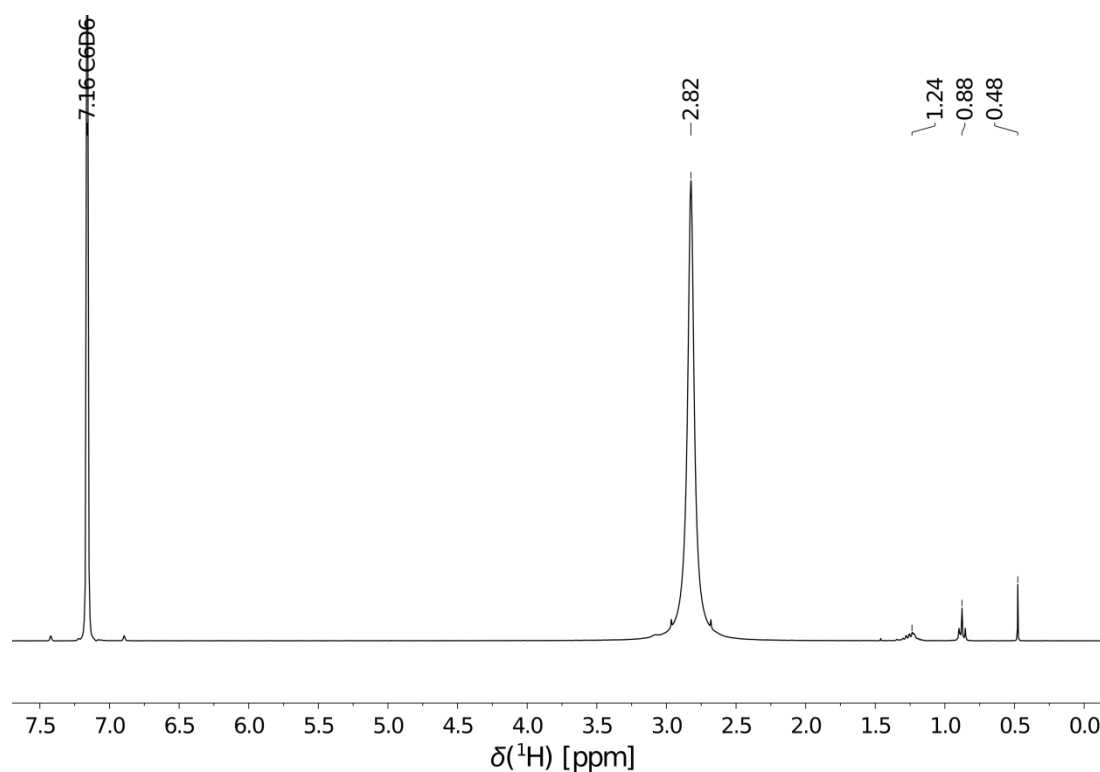

**Figure S2.**  $^1\text{H}$  NMR spectrum (300 MHz,  $\text{C}_6\text{D}_6$ ) of 4-Chloro-2,3,5,6-tetrafluoroaniline (1).

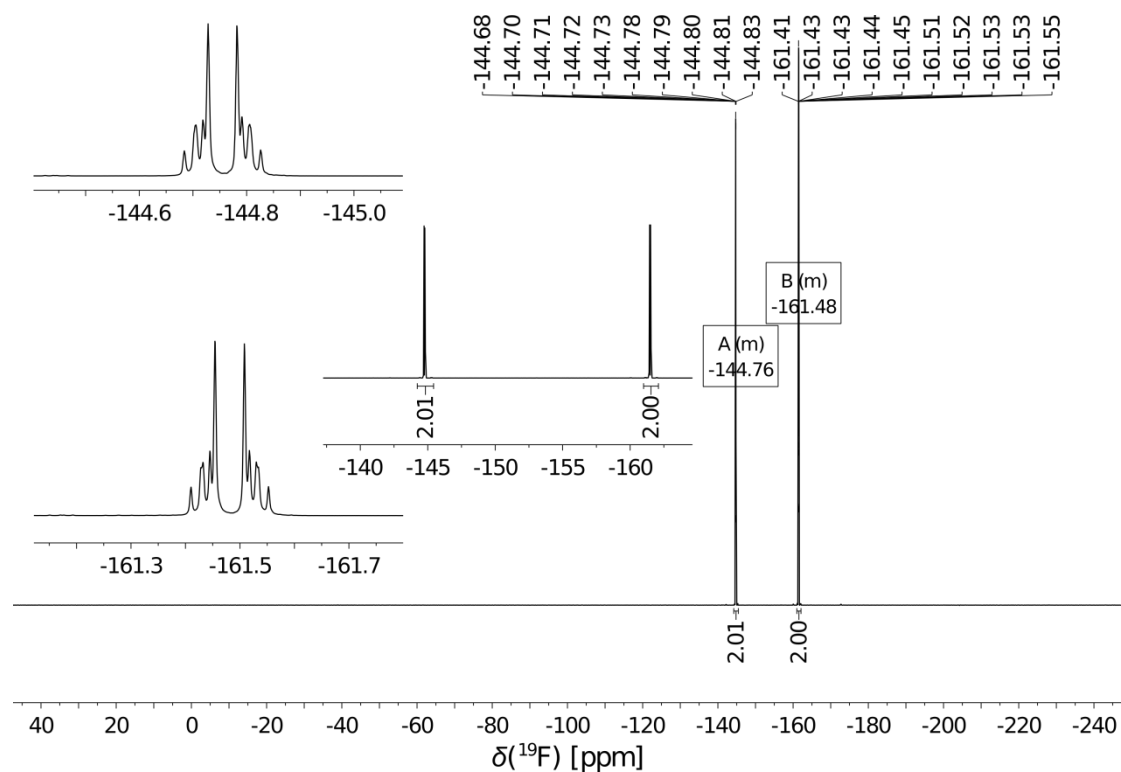

**Figure S3.**  $^{19}\text{F}$  NMR spectrum (282 MHz,  $\text{C}_6\text{D}_6$ ) of 4-chloro-2,3,5,6-tetrafluoroaniline (**1**).

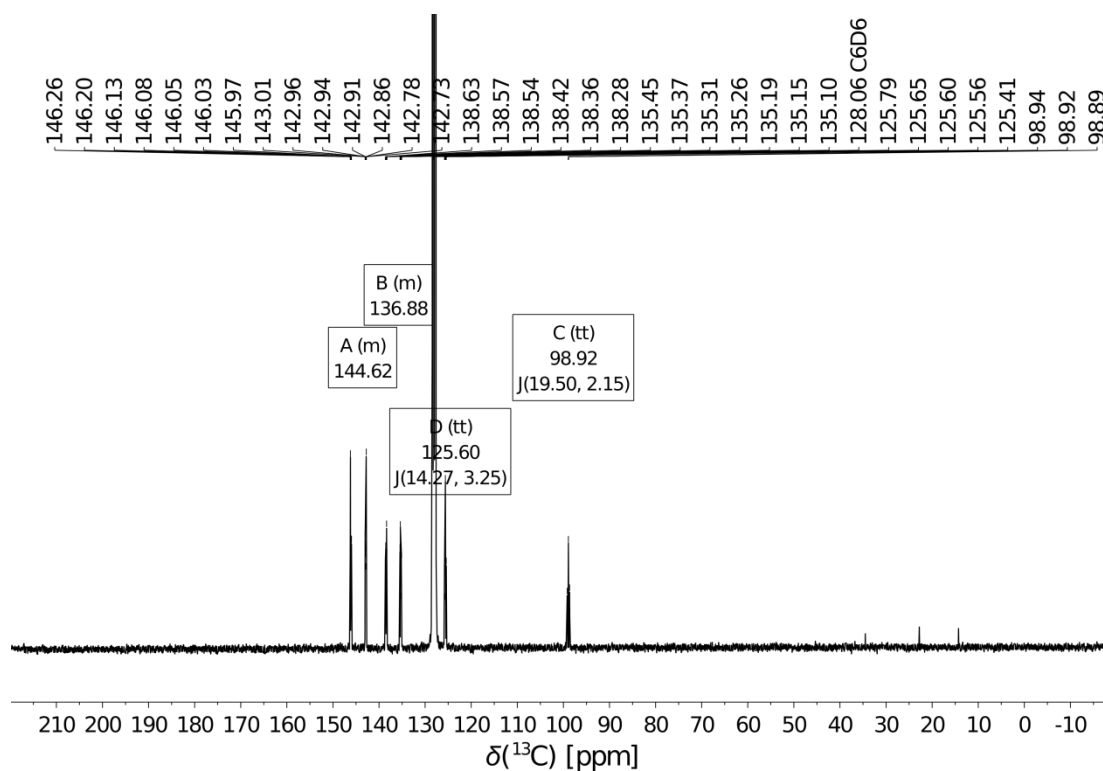

**Figure S4.** Full  $^{13}\text{C}\{^1\text{H}\}$  NMR spectrum (75 MHz,  $\text{C}_6\text{D}_6$ ) of 4-chloro-2,3,5,6-tetrafluoroaniline (**1**).

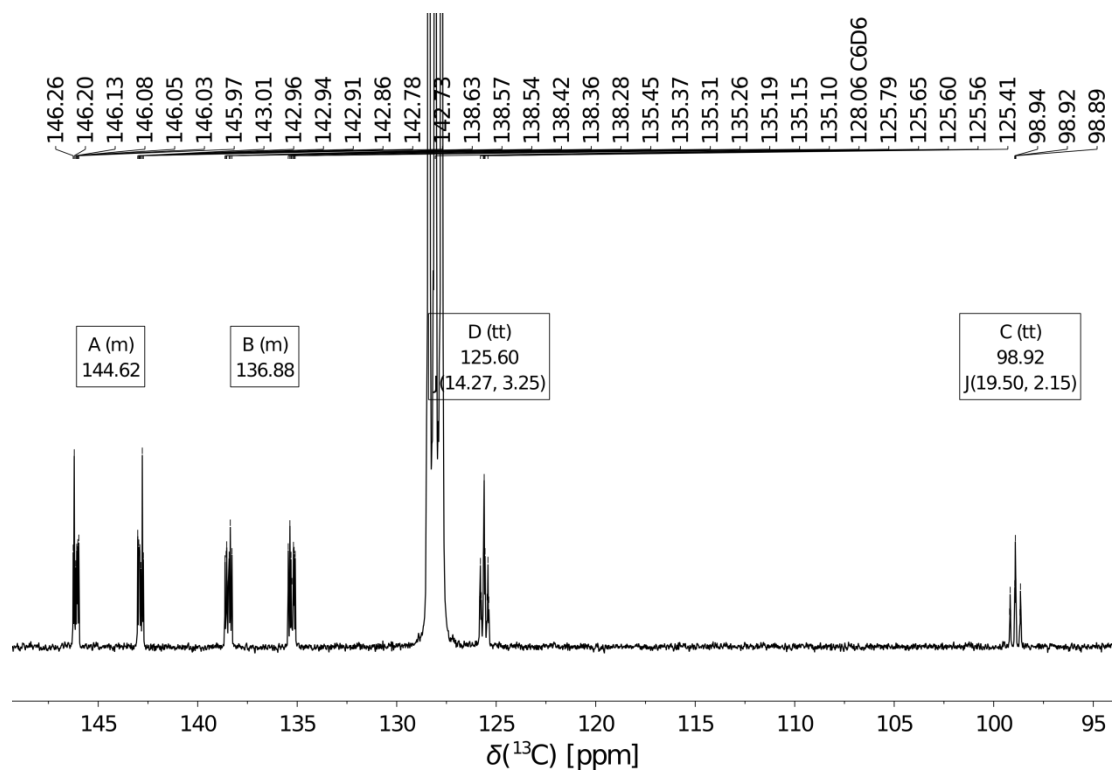

**Figure S5.** Excerpt of the  $^{13}\text{C}\{^1\text{H}\}$  NMR spectrum (75 MHz,  $\text{C}_6\text{D}_6$ ) of 4-chloro-2,3,5,6-tetrafluoroaniline (1).

#### 4-Chloro-2,3,5,6-tetrafluorobromobenzene (2)

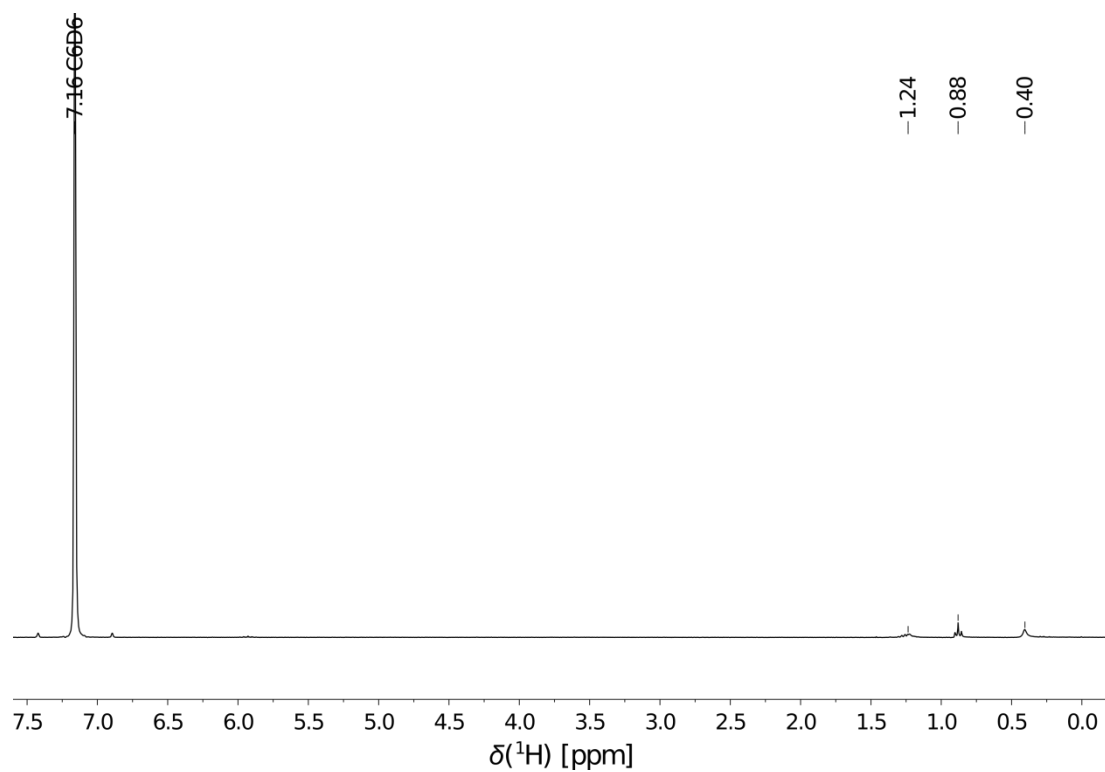

**Figure S6.**  $^1\text{H}$  NMR spectrum (300 MHz,  $\text{C}_6\text{D}_6$ ) of 4-chloro-2,3,5,6-tetrafluorobromobenzene (2).

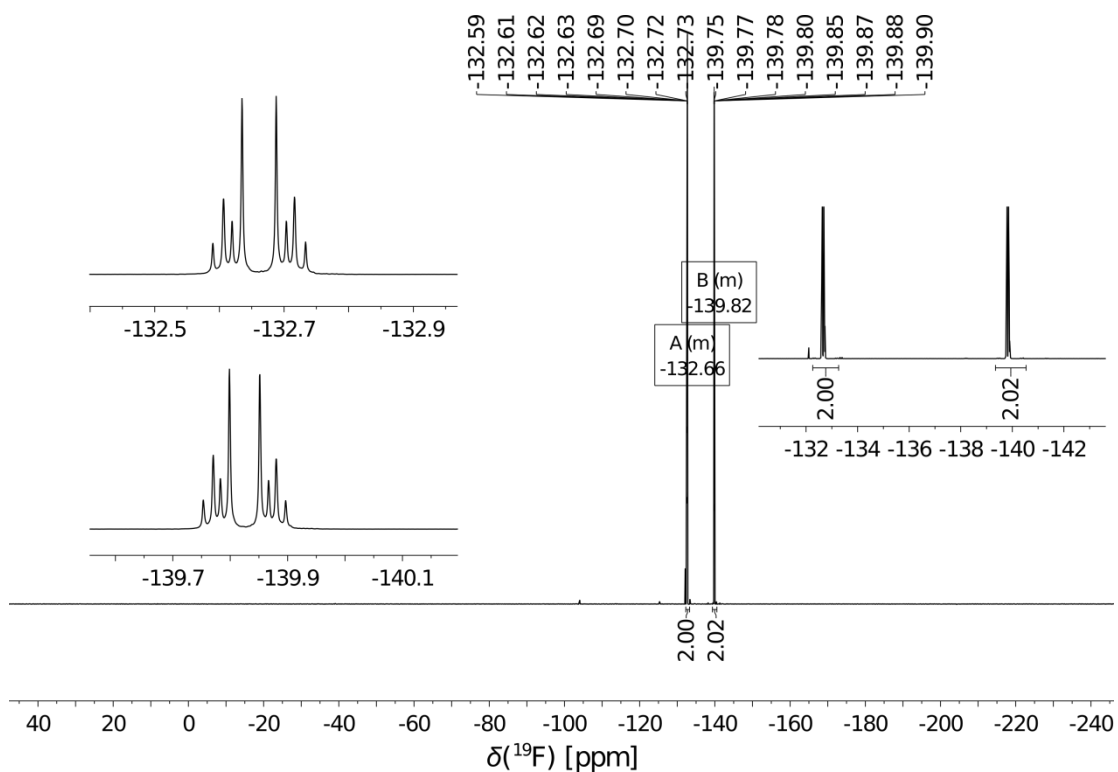

**Figure S7.**  $^{19}\text{F}$  NMR spectrum (282 MHz,  $\text{C}_6\text{D}_6$ ) of 4-chloro-2,3,5,6-tetrafluorobromobenzene (**2**).

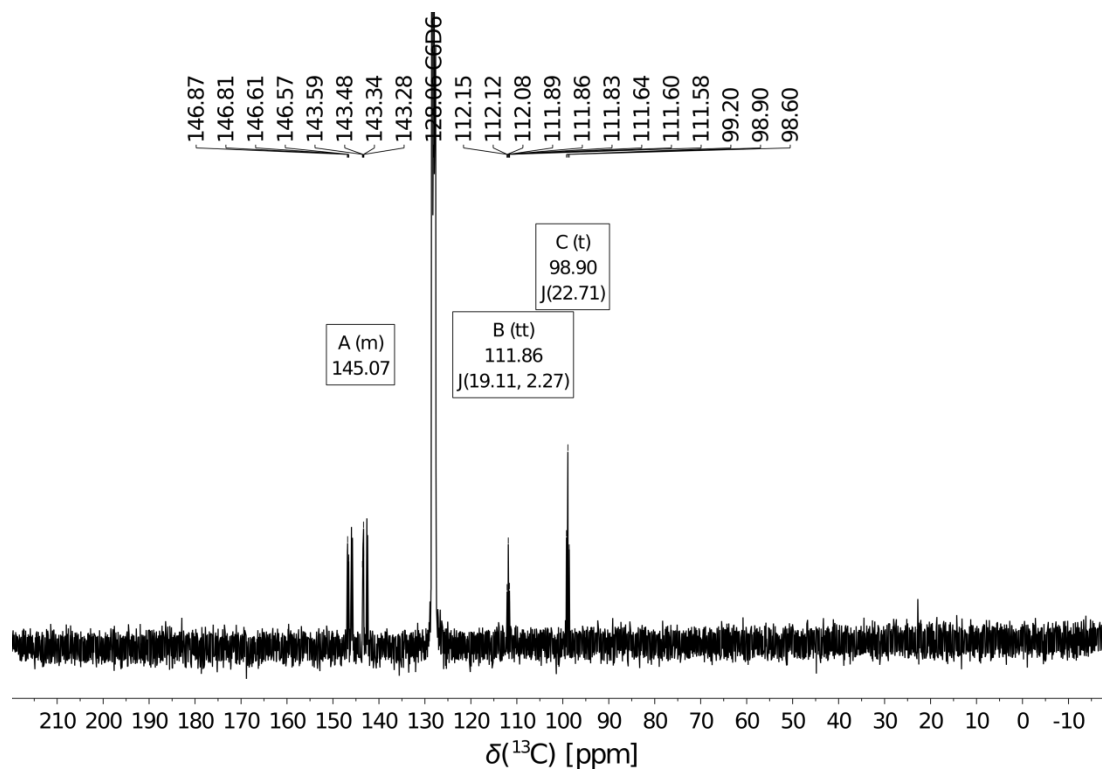

**Figure S8.** Full  $^{13}\text{C}\{^1\text{H}\}$  NMR spectrum (75 MHz,  $\text{C}_6\text{D}_6$ ) of 4-chloro-2,3,5,6-tetrafluorobromobenzene (**2**).

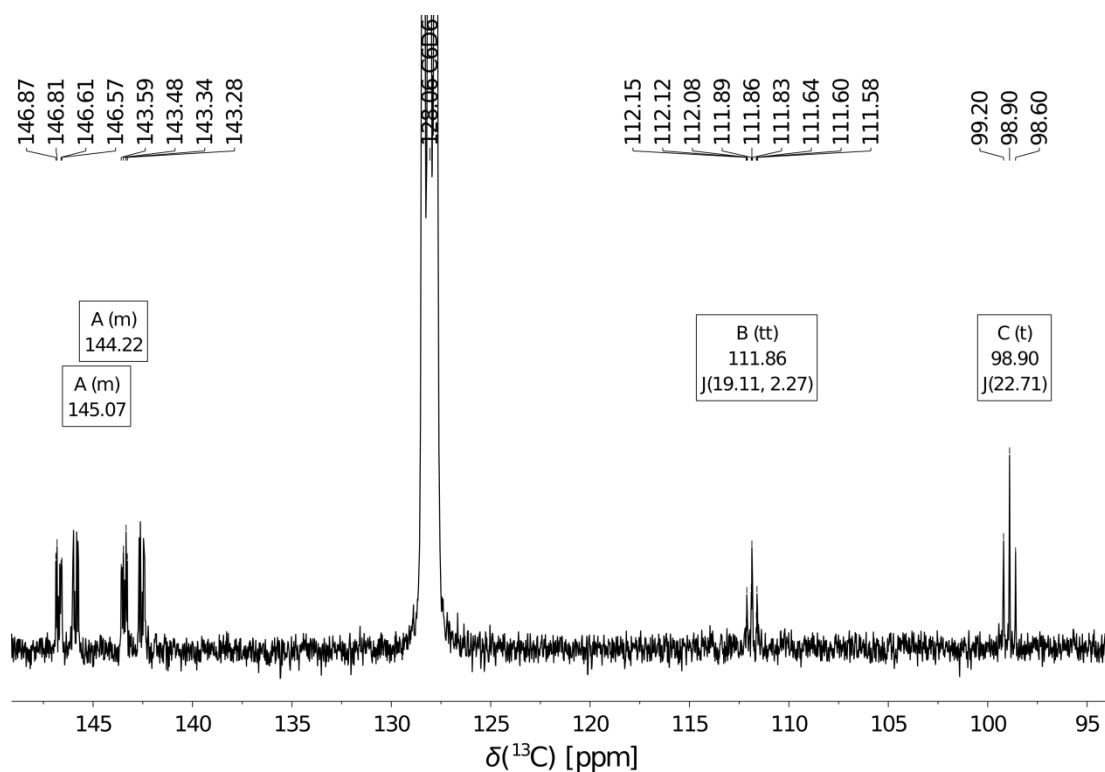

**Figure S9.** Excerpt of the  $^{13}\text{C}\{^1\text{H}\}$  NMR spectrum (75 MHz,  $\text{C}_6\text{D}_6$ ) of 4-chloro-2,3,5,6-tetrafluorobromobenzene (**2**).

#### 4-Chloro-2,3,5,6-tetrafluoriodobenzene (**3**)

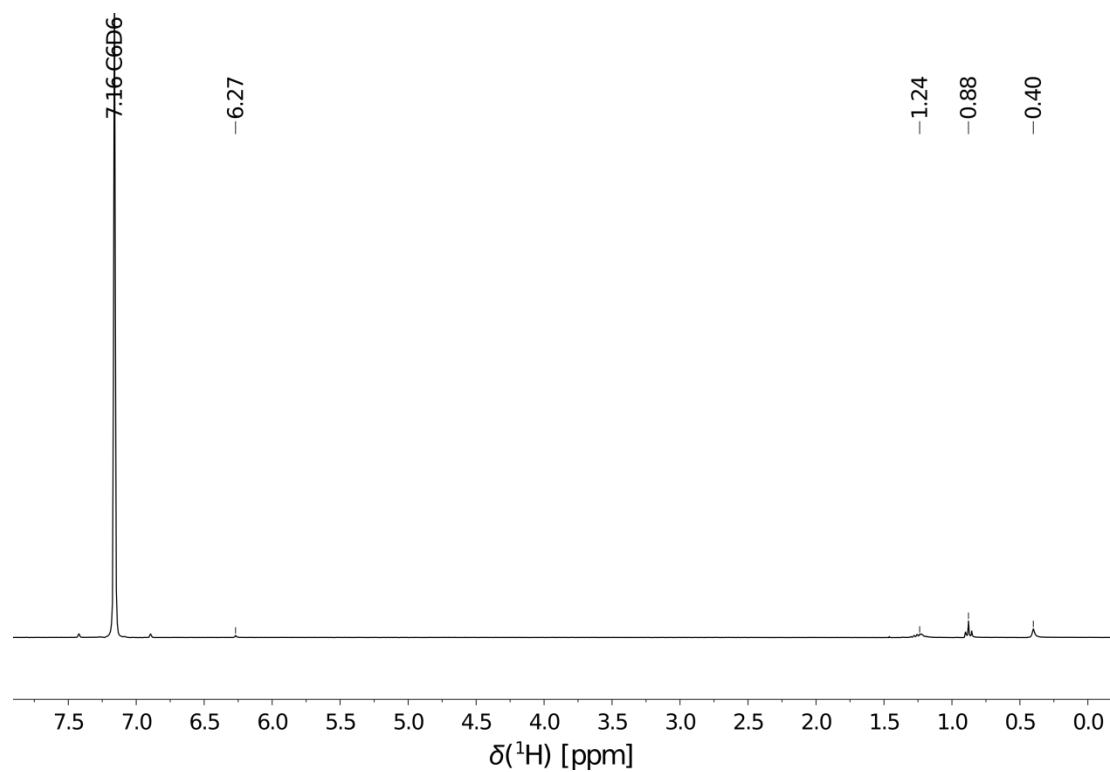

**Figure S10.**  $^1\text{H}$  NMR spectrum (300 MHz,  $\text{C}_6\text{D}_6$ ) of 4-chloro-2,3,5,6-tetrafluoriodobenzene (**3**).

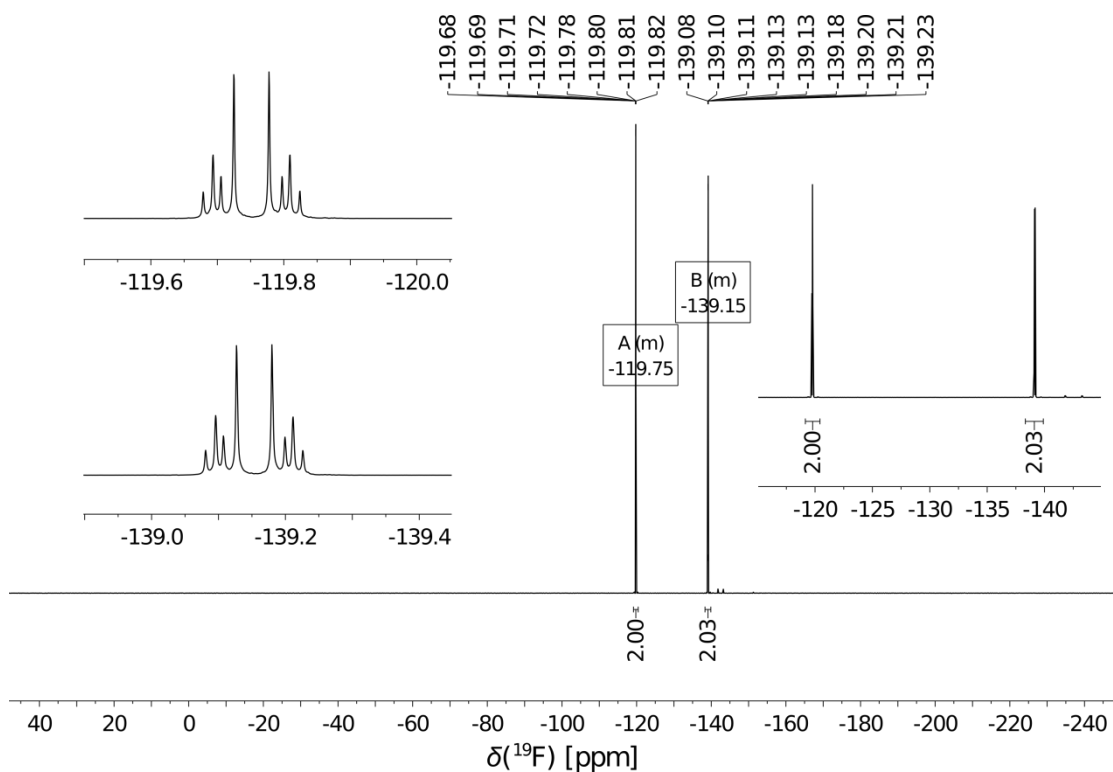

**Figure S11.**  $^{19}\text{F}$  NMR spectrum (282 MHz,  $\text{C}_6\text{D}_6$ ) of 4-chloro-2,3,5,6-tetrafluoriodobenzene (**3**).

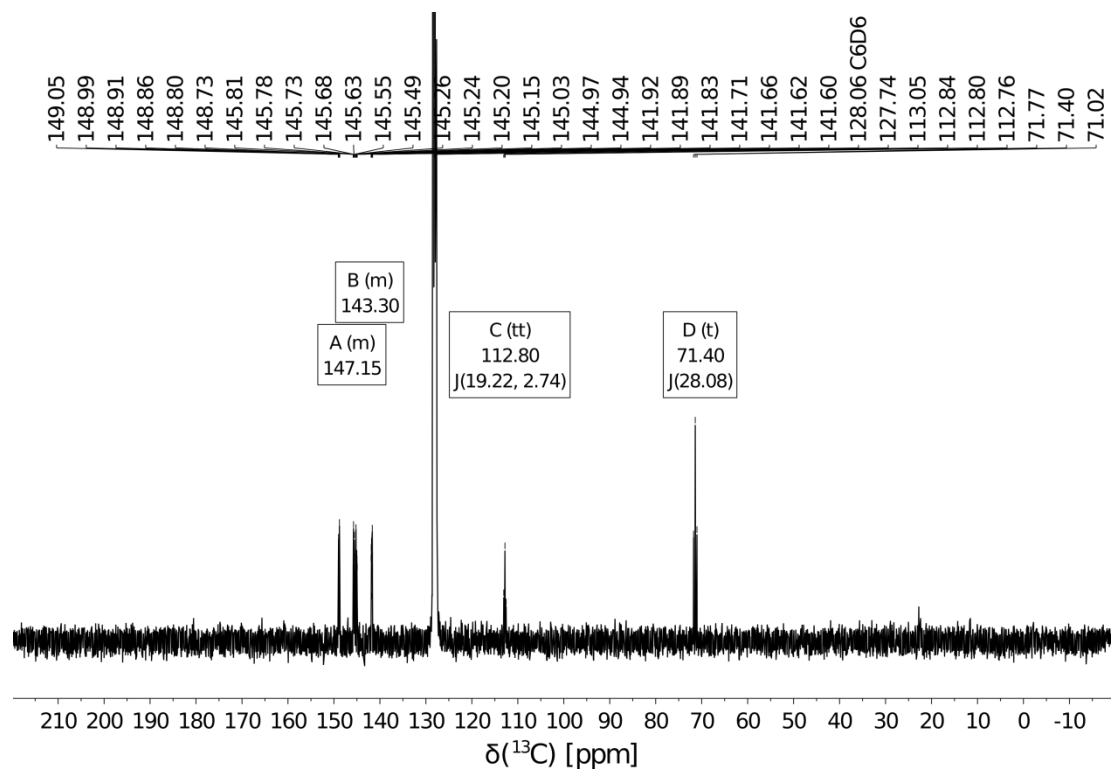

**Figure S12.** Full  $^{13}\text{C}\{^1\text{H}\}$  NMR spectrum (75 MHz,  $\text{C}_6\text{D}_6$ ) of 4-chloro-2,3,5,6-tetrafluoriodobenzene (**3**).

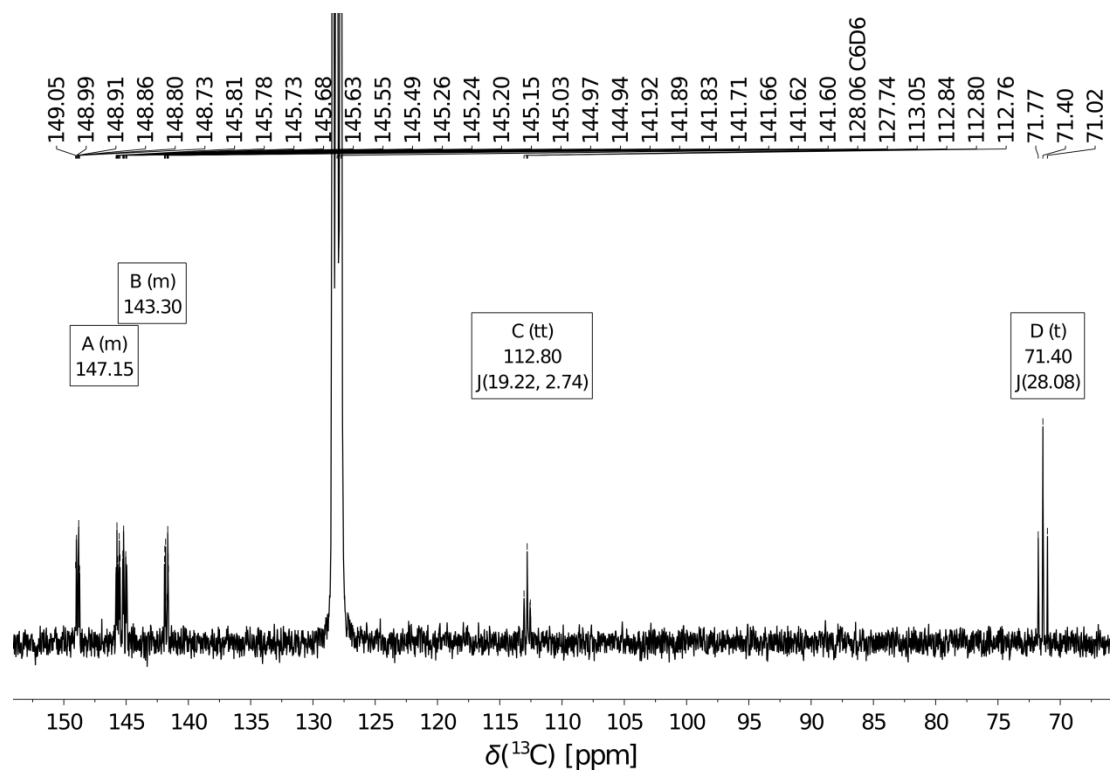

**Figure S13.** Excerpt of the  $^{13}\text{C}\{^1\text{H}\}$  NMR spectrum (75 MHz,  $\text{C}_6\text{D}_6$ ) of 4-chloro-2,3,5,6-tetrafluoriodobenzene (**3**).

**Bis(*para*-chlorotetrafluorophenyl)dimethylstannane (**4**)**

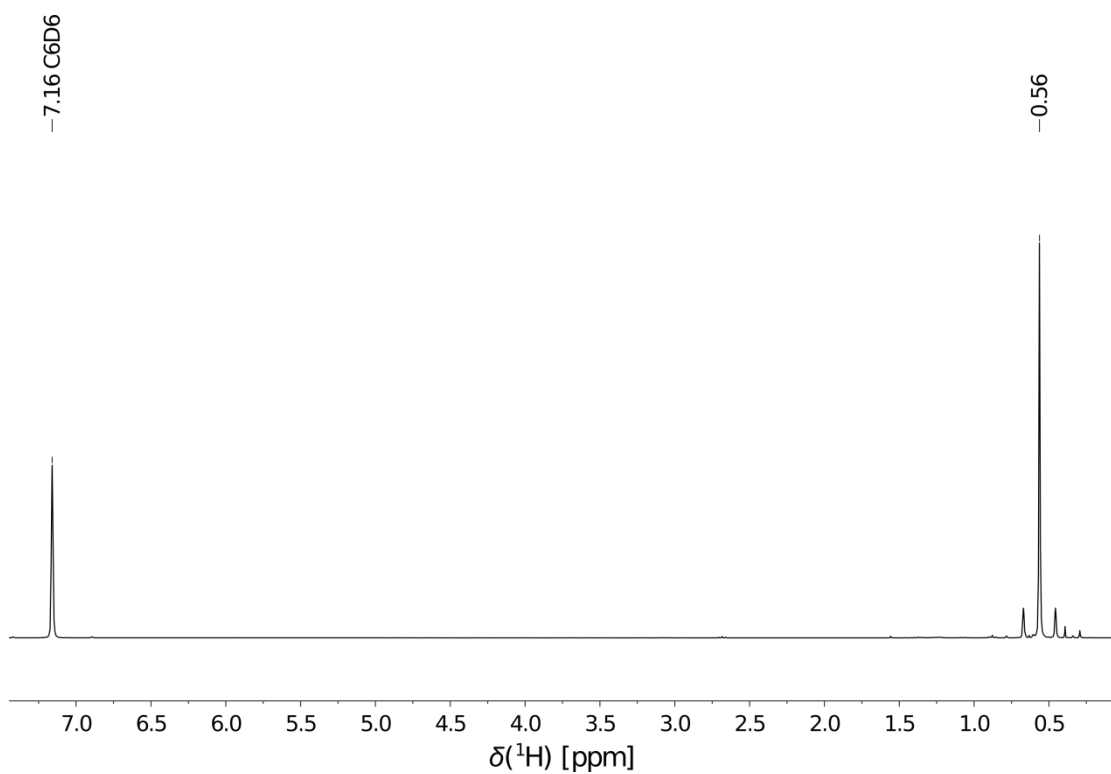

**Figure S14.**  $^1\text{H}$  NMR spectrum (300 MHz,  $\text{C}_6\text{D}_6$ ) of bis(*para*-chlorotetrafluorophenyl)dimethylstannane (**4**).



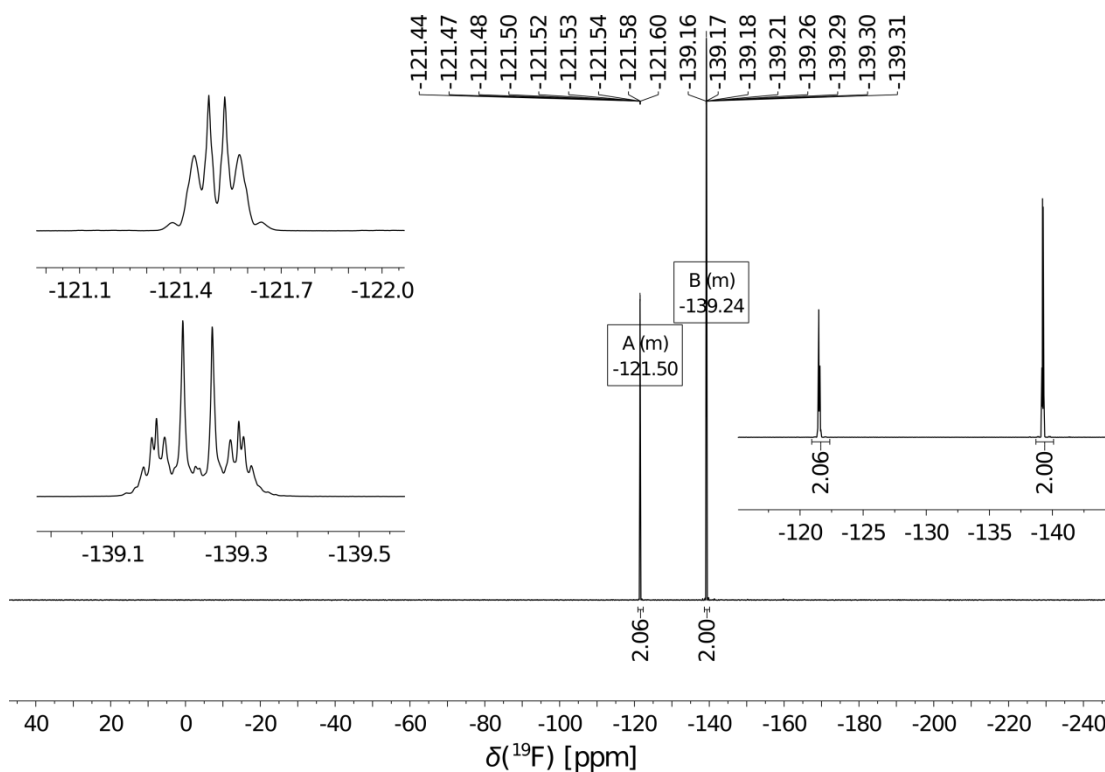

**Figure S15.**  $^{19}\text{F}$  NMR spectrum (282 MHz,  $\text{C}_6\text{D}_6$ ) of bis(*para*-chlorotetrafluorophenyl)dimethylstannane (4).

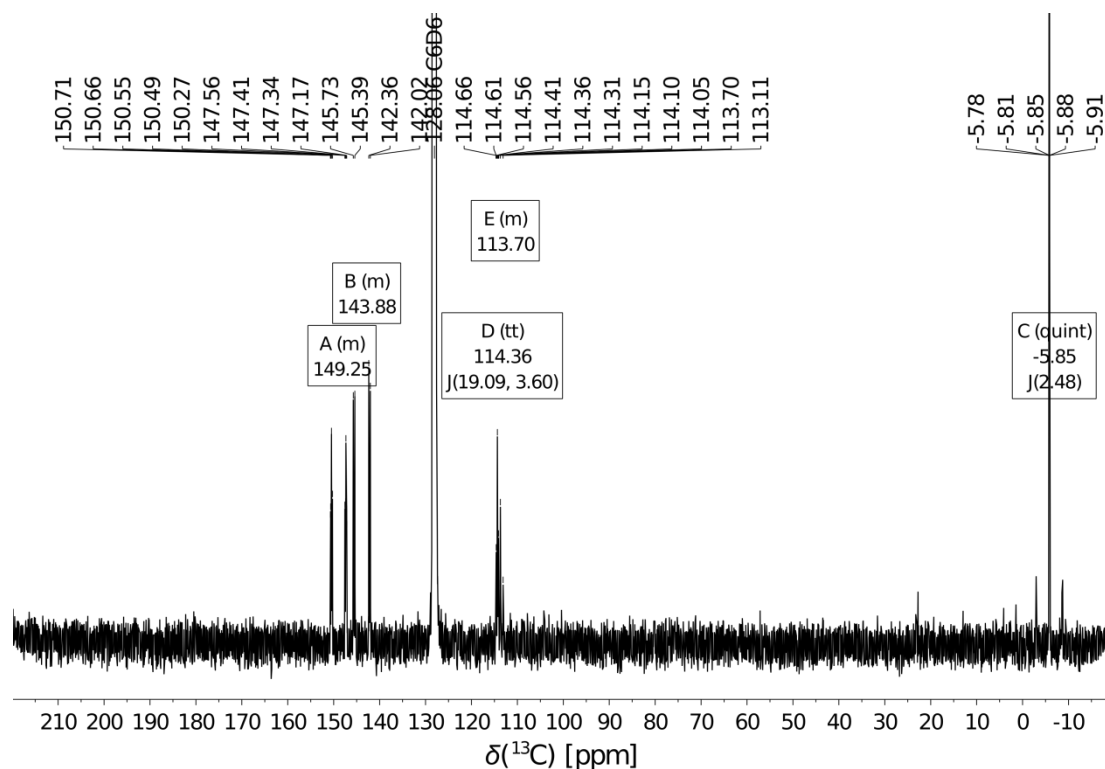

**Figure S16.** Full  $^{13}\text{C}$  NMR spectrum (75 MHz,  $\text{C}_6\text{D}_6$ ) of bis(*para*-chlorotetrafluorophenyl)-dimethylstannane (4).

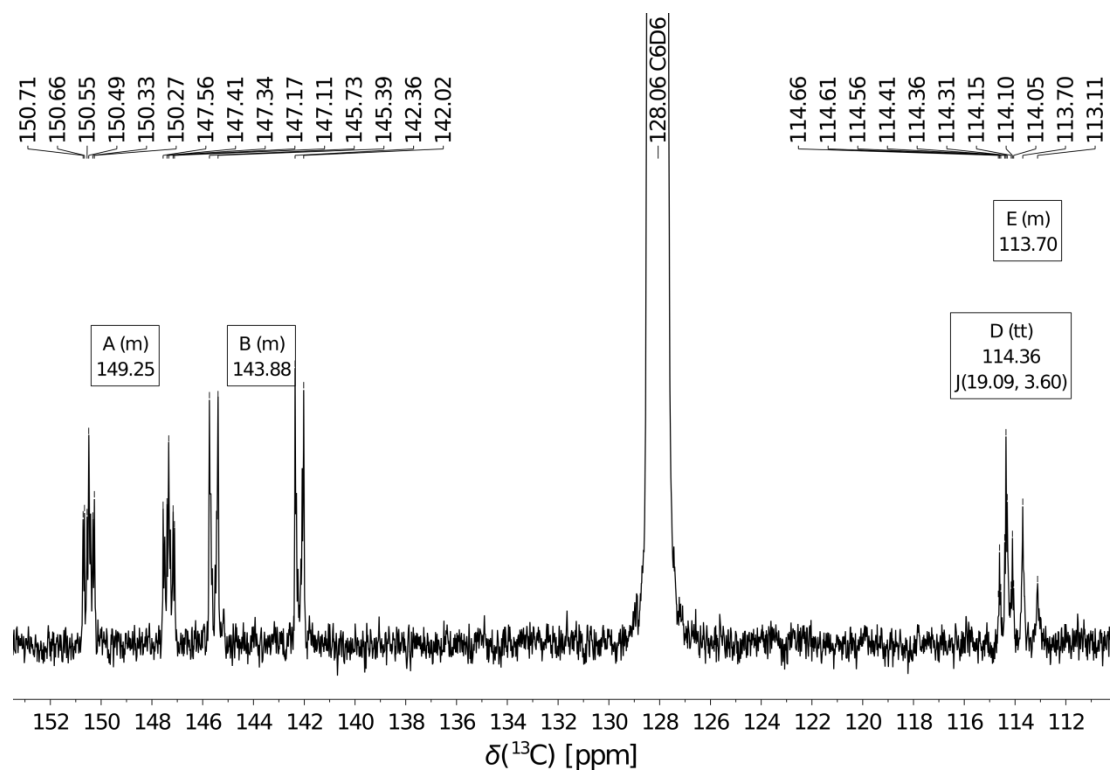

**Figure S17.** Excerpt of the  $^{13}\text{C}\{^1\text{H}\}$  NMR spectrum (75 MHz,  $\text{C}_6\text{D}_6$ ) of bis(*para*-chlorotetrafluorophenyl)dimethylstannane (**4**) containing the signals of aromatic carbon atoms.

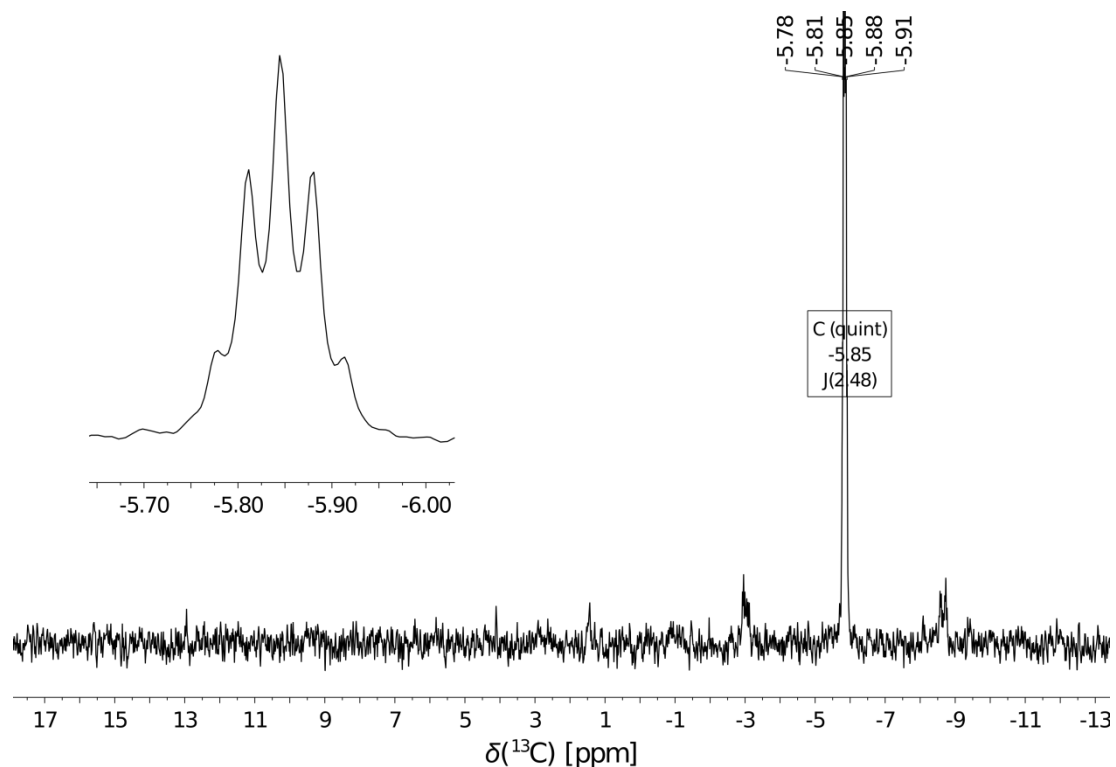

**Figure S18.** Excerpt of the  $^{13}\text{C}\{^1\text{H}\}$  NMR spectrum (75 MHz,  $\text{C}_6\text{D}_6$ ) of bis(*para*-chlorotetrafluorophenyl)dimethylstannane (**4**) containing the signal of the aliphatic carbon atoms.

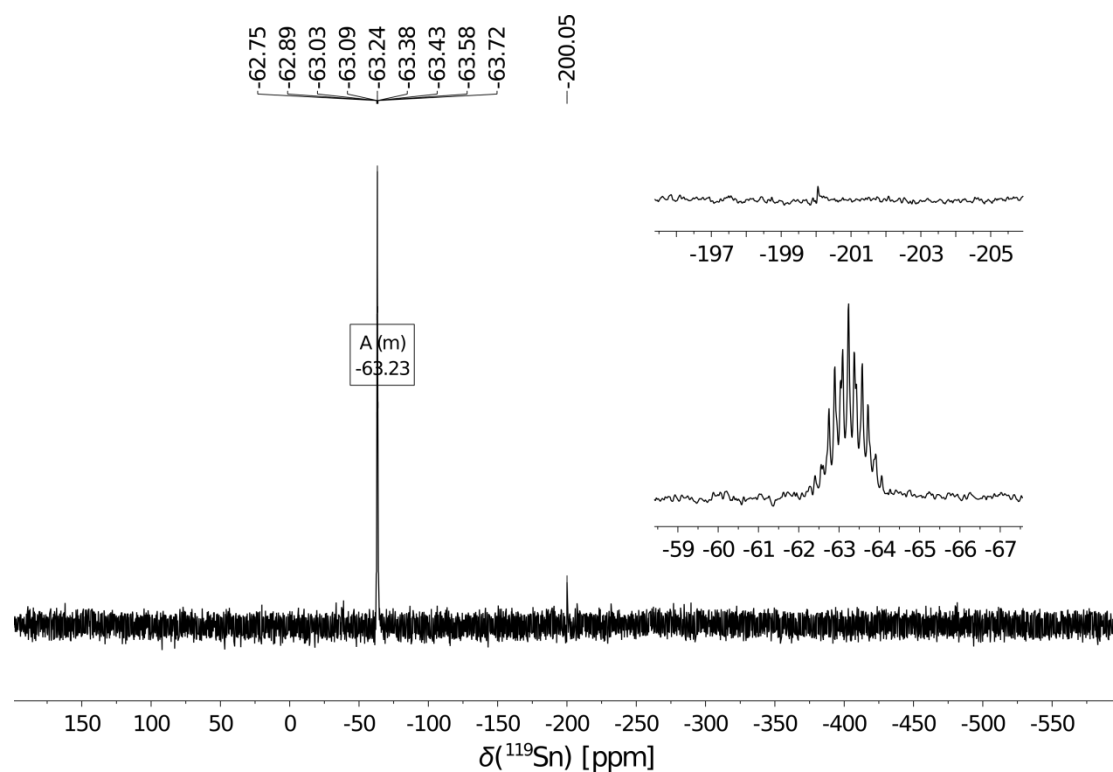

**Figure S19.**  $^{119}\text{Sn}\{^1\text{H}\}$  NMR spectrum (112 MHz,  $\text{C}_6\text{D}_6$ ) of bis(*para*-chlorotetrafluorophenyl)dimethylstannane (**4**).

**Bis(*para*-chlorotetrafluorophenyl)chloroborane (**5**)**

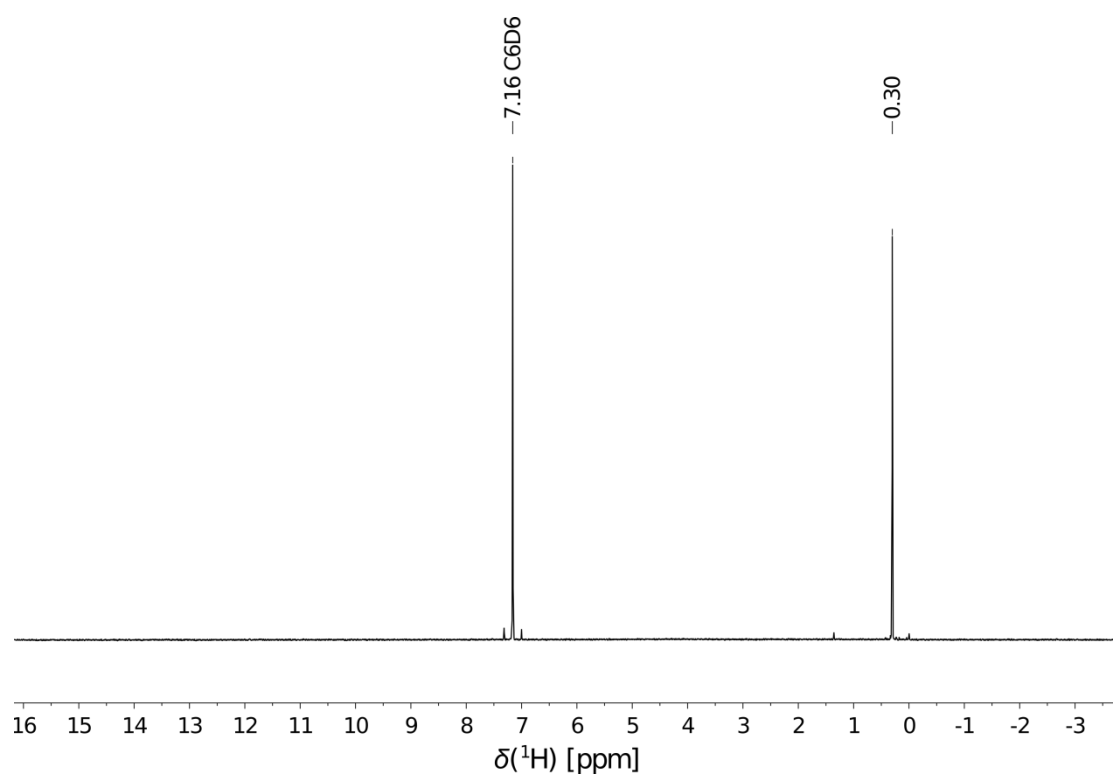

**Figure S20.**  $^1\text{H}$  NMR spectrum (500 MHz,  $\text{C}_6\text{D}_6$ ) of bis(*para*-chlorotetrafluorophenyl)chloroborane (**5**).

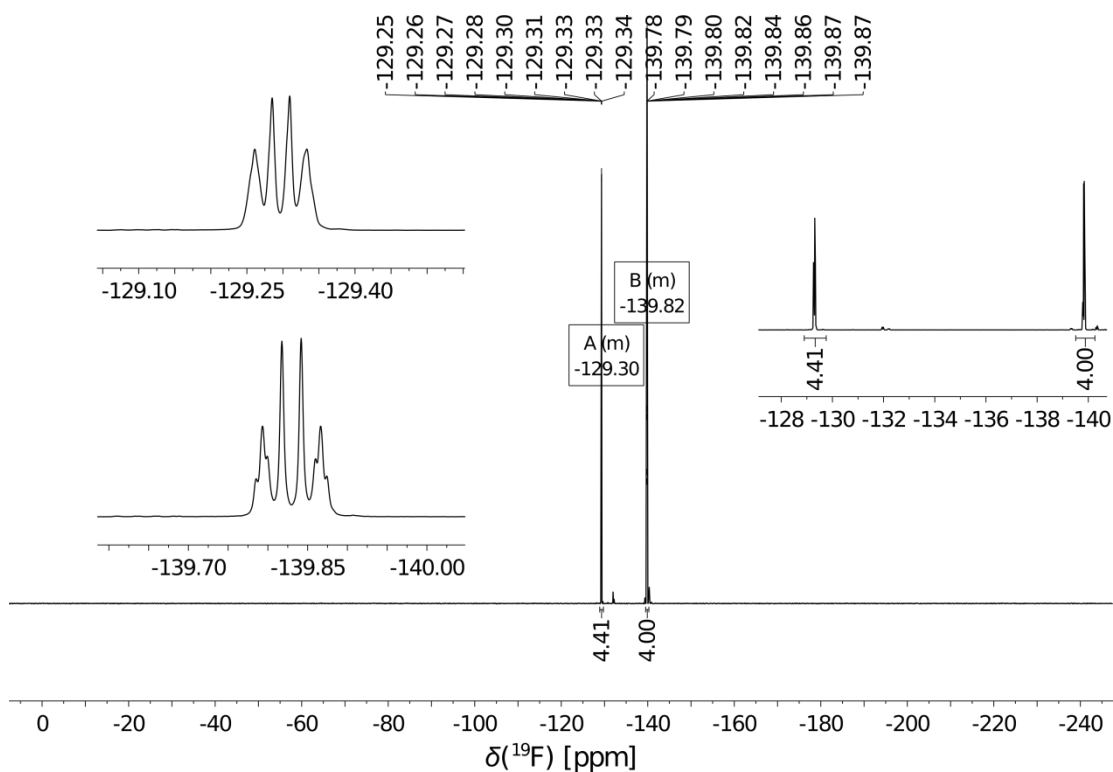

**Figure S21.**  $^{19}\text{F}$  NMR spectrum (471 MHz,  $\text{C}_6\text{D}_6$ ) of bis(*para*-chlorotetrafluorophenyl)chloroborane (**5**).

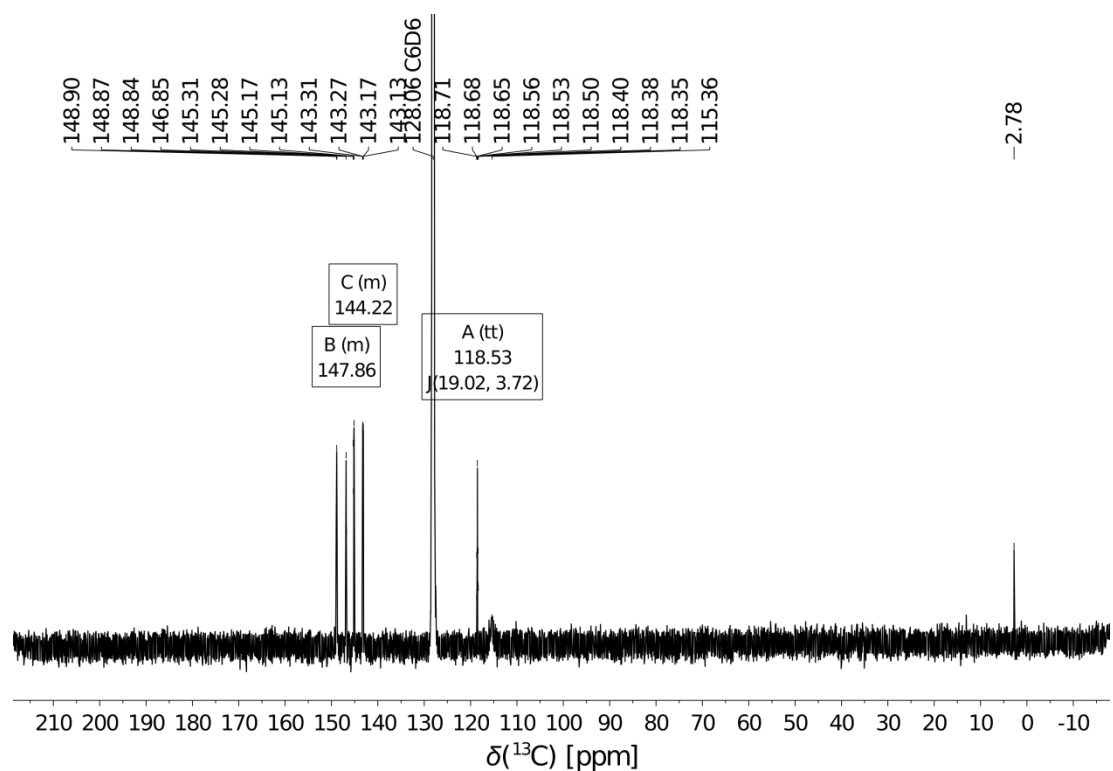

**Figure S22.** Full  $^{13}\text{C}\{^1\text{H}\}$  NMR spectrum (126 MHz,  $\text{C}_6\text{D}_6$ ) of bis(*para*-chlorotetrafluorophenyl)chloroborane (**5**).

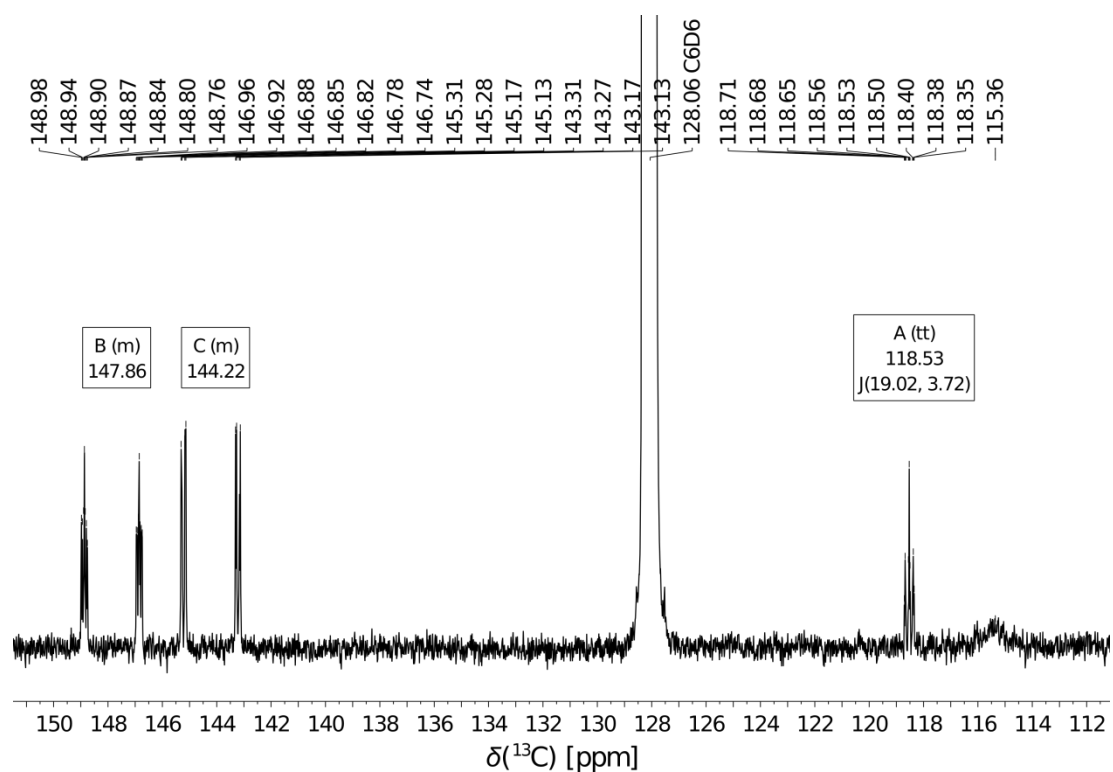

**Figure S23.** Excerpt of the  $^{13}\text{C}\{^1\text{H}\}$  NMR spectrum (126 MHz,  $\text{C}_6\text{D}_6$ ) of bis(*para*-chlorotetrafluorophenyl)chloroborane (**5**).

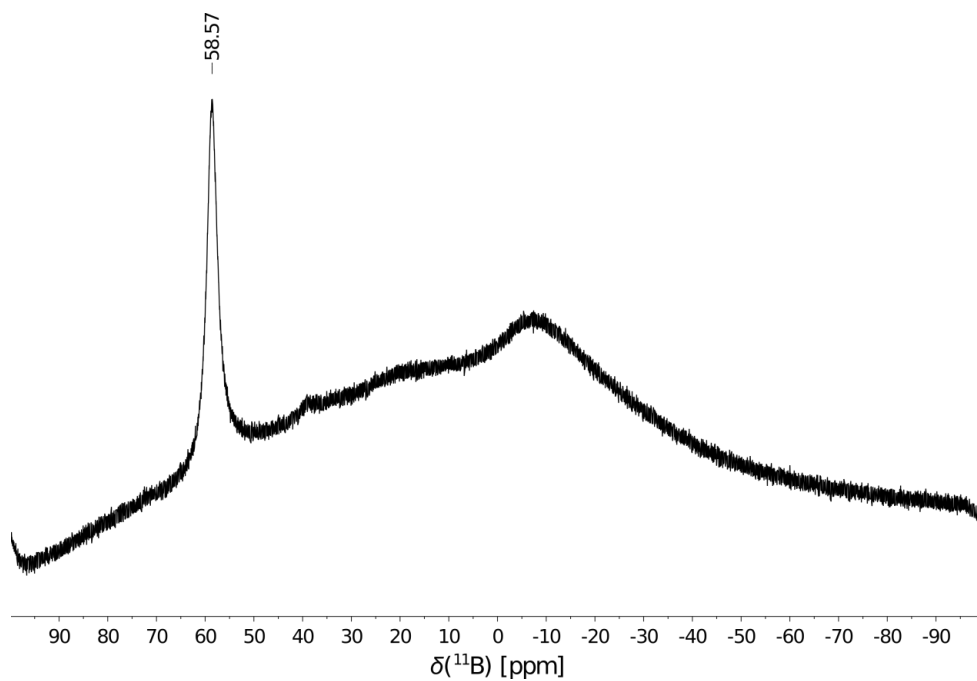

**Figure S24.**  $^{11}\text{B}$  NMR spectrum (160 MHz,  $\text{C}_6\text{D}_6$ ) of bis(*para*-chlorotetrafluorophenyl)chloroborane (**5**).

**Reaction mixtures of the hydroborations of Ph-CH=CH<sub>2</sub>, Ph-C≡CH, TMS-CH=CH<sub>2</sub> and TMS-C≡CH with bis(*para*-chlorotetrafluorophenyl)hydridoborane (6)**

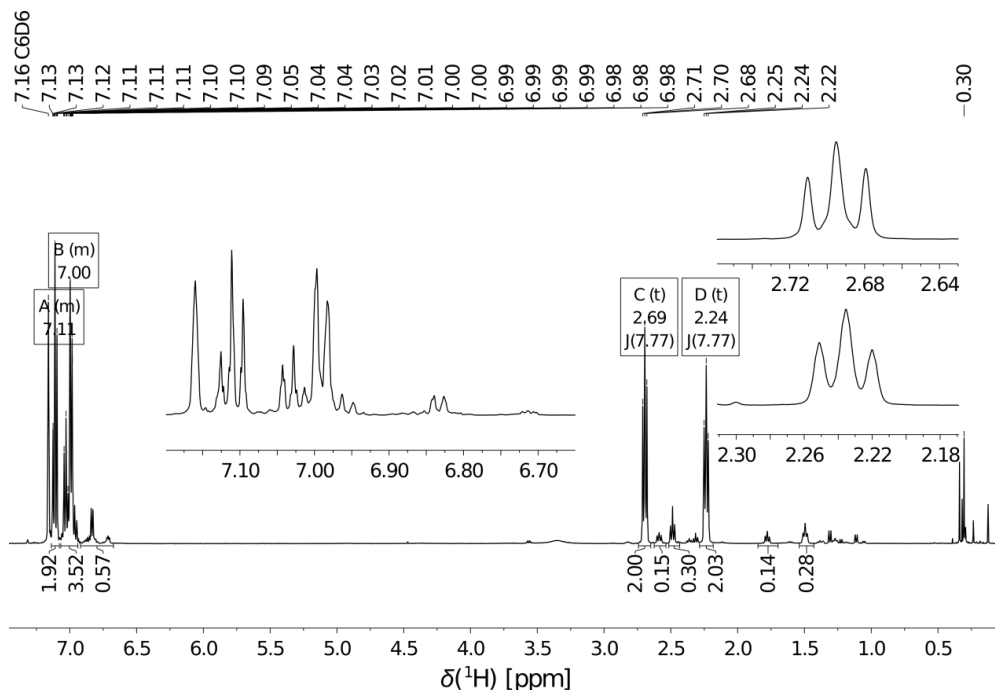

**Figure S25.** <sup>1</sup>H NMR spectrum (500 MHz, C<sub>6</sub>D<sub>6</sub>) of the hydroboration of styrene (Ph-CH=CH<sub>2</sub>) with bis(*para*-chlorotetrafluorophenyl)hydridoborane (6) containing 2-phenyl-1-(bis(4-chloro-2,3,5,6-tetrafluorophenyl)boranyl)ethane as the main product.

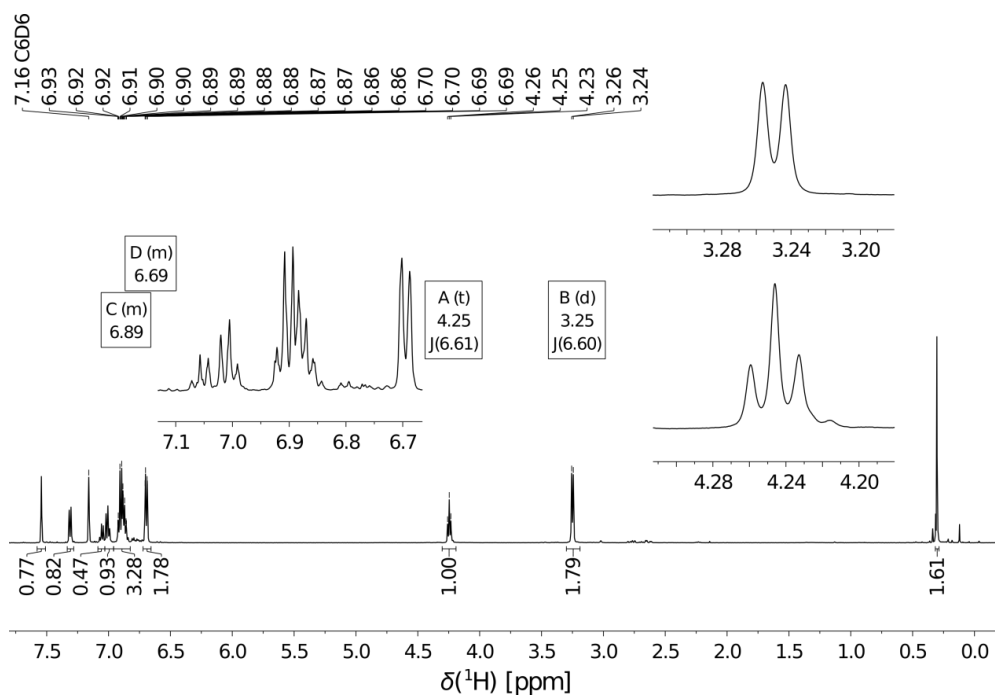

**Figure S26.** <sup>1</sup>H NMR spectrum (500 MHz, C<sub>6</sub>D<sub>6</sub>) of the hydroboration of phenylacetylene (Ph-C≡CH) with two equivalents of bis(*para*-chlorotetrafluorophenyl)hydridoborane (6) containing 2-phenyl-1-bis(bis(4-chloro-2,3,5,6-tetrafluorophenyl)boranyl)ethane as the main product.

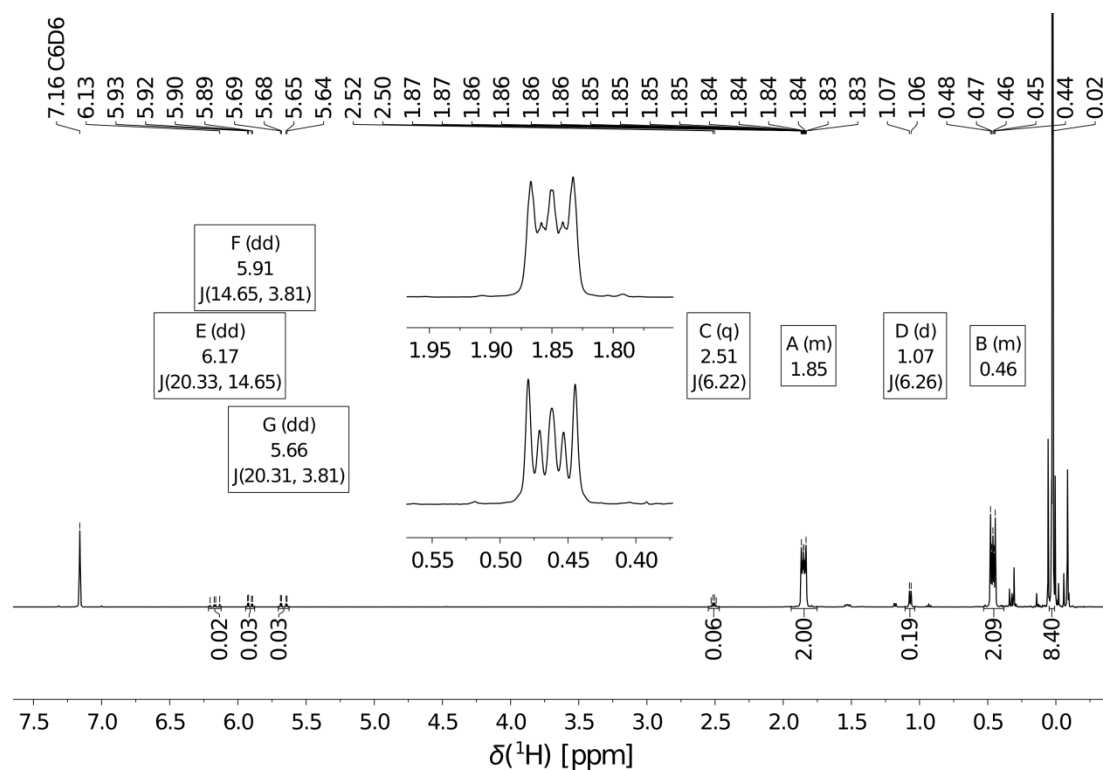

**Figure S27.**  $^1\text{H}$  NMR spectrum (500 MHz,  $\text{C}_6\text{D}_6$ ) of the hydroboration of trimethylvinylsilane ( $\text{TMS-CH=CH}_2$ ) with bis(*para*-chlorotetrafluorophenyl)hydridoborane (**6**) containing 2-(trimethylsilyl)-1-(bis(4-chloro-2,3,5,6-tetrafluorophenyl)boranyl)ethane as the main product.

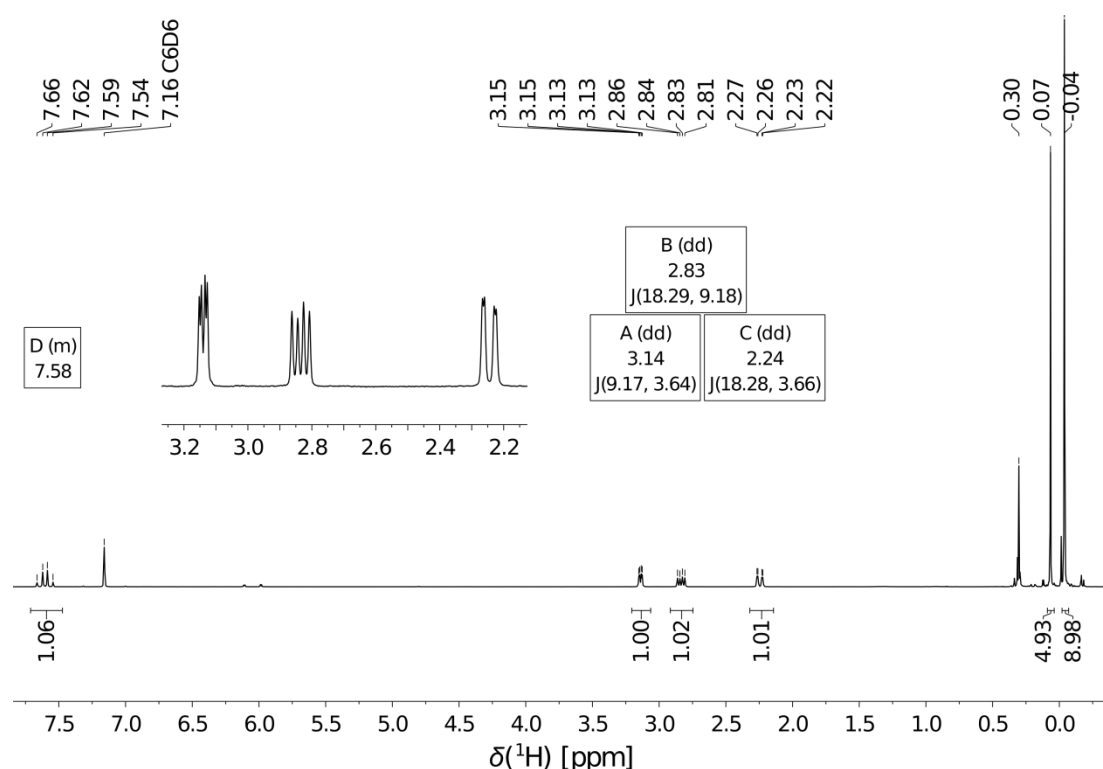

**Figure S28.**  $^1\text{H}$  NMR spectrum (500 MHz,  $\text{C}_6\text{D}_6$ ) of the hydroboration of trimethylsilylacetylene ( $\text{TMS-C}\equiv\text{CH}$ ) with two equivalents of bis(*para*-chlorotetrafluorophenyl)hydridoborane (**6**) containing 2-(trimethylsilyl)-1,1-bis(bis(4-chloro-2,3,5,6-tetrafluorophenyl)boranyl)ethane as the main product.

**Tris(*para*-chlorotetrafluorophenyl)borane (7)**

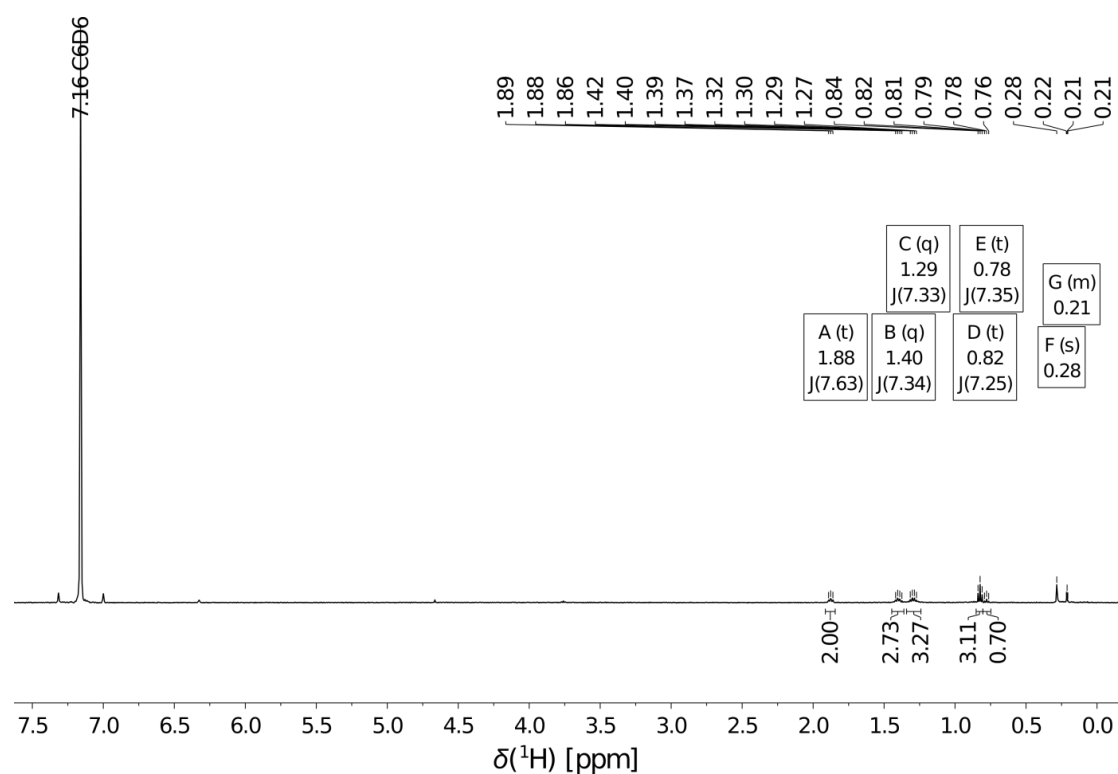

**Figure S29.** <sup>1</sup>H NMR spectrum (500 MHz, C<sub>6</sub>D<sub>6</sub>) of tris(*para*-chlorotetrafluorophenyl)borane (7).

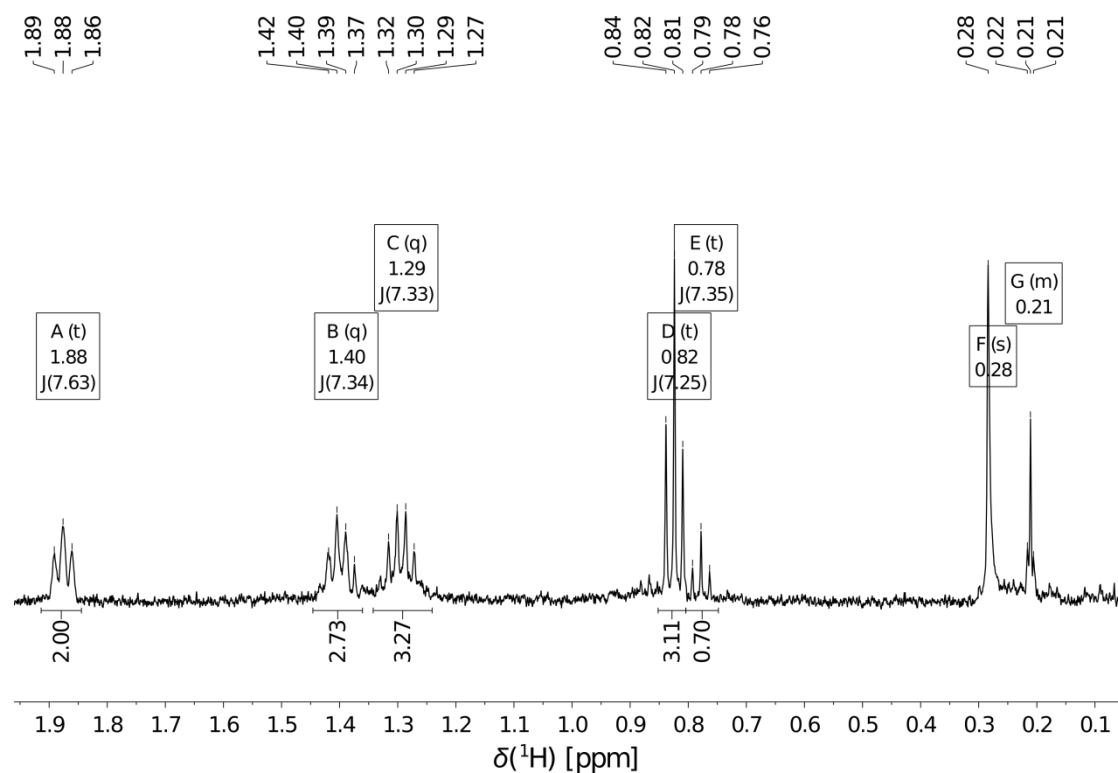

**Figure S30.** Excerpt of the <sup>1</sup>H NMR spectrum (500 MHz, C<sub>6</sub>D<sub>6</sub>) of tris(*para*-chlorotetrafluorophenyl)borane (7).



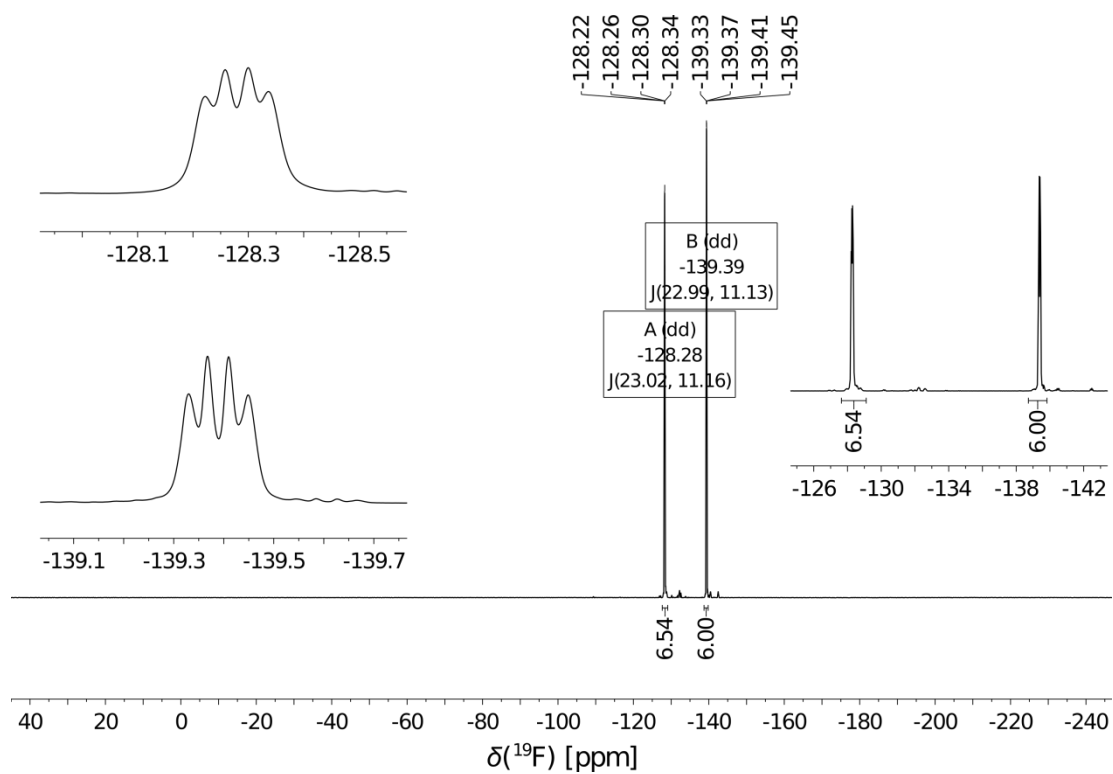

**Figure S31.**  $^{19}\text{F}$  NMR spectrum (282 MHz,  $\text{C}_6\text{D}_6$ ) of tris(*para*-chlorotetrafluorophenyl)borane (**7**).

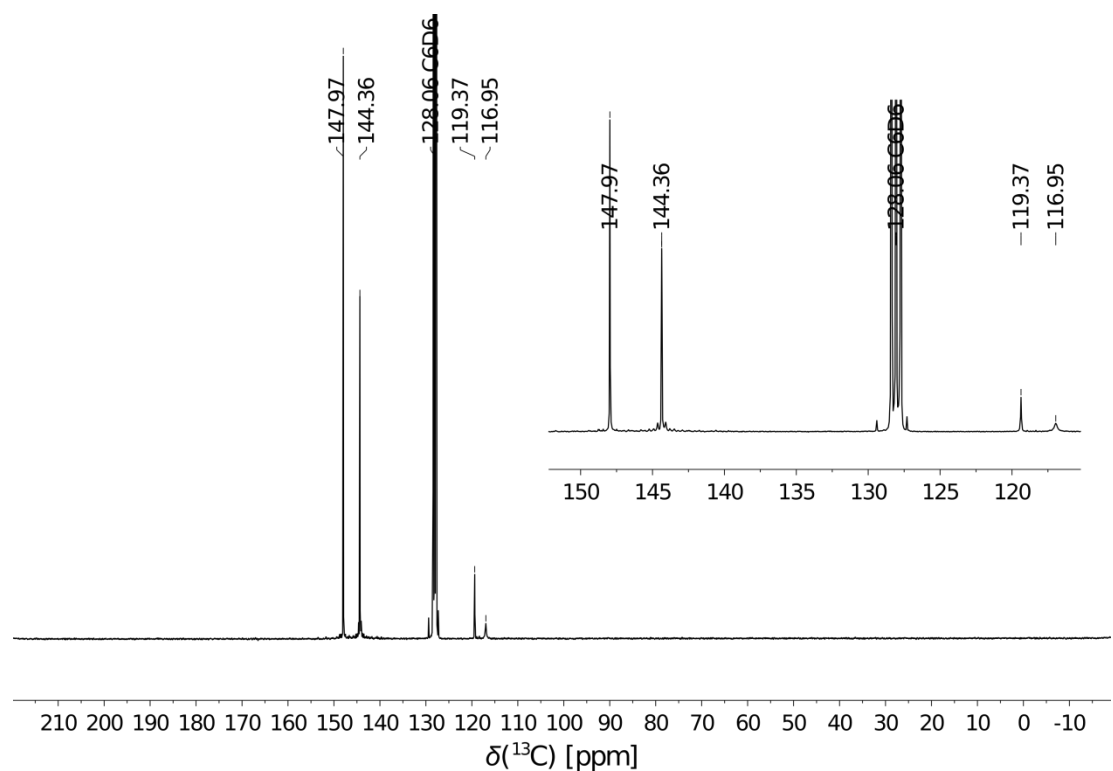

**Figure S32.**  $^{13}\text{C}\{^{19}\text{F}\}$  NMR spectrum (75 MHz,  $\text{C}_6\text{D}_6$ ) of tris(*para*-chlorotetrafluorophenyl)borane (**7**).

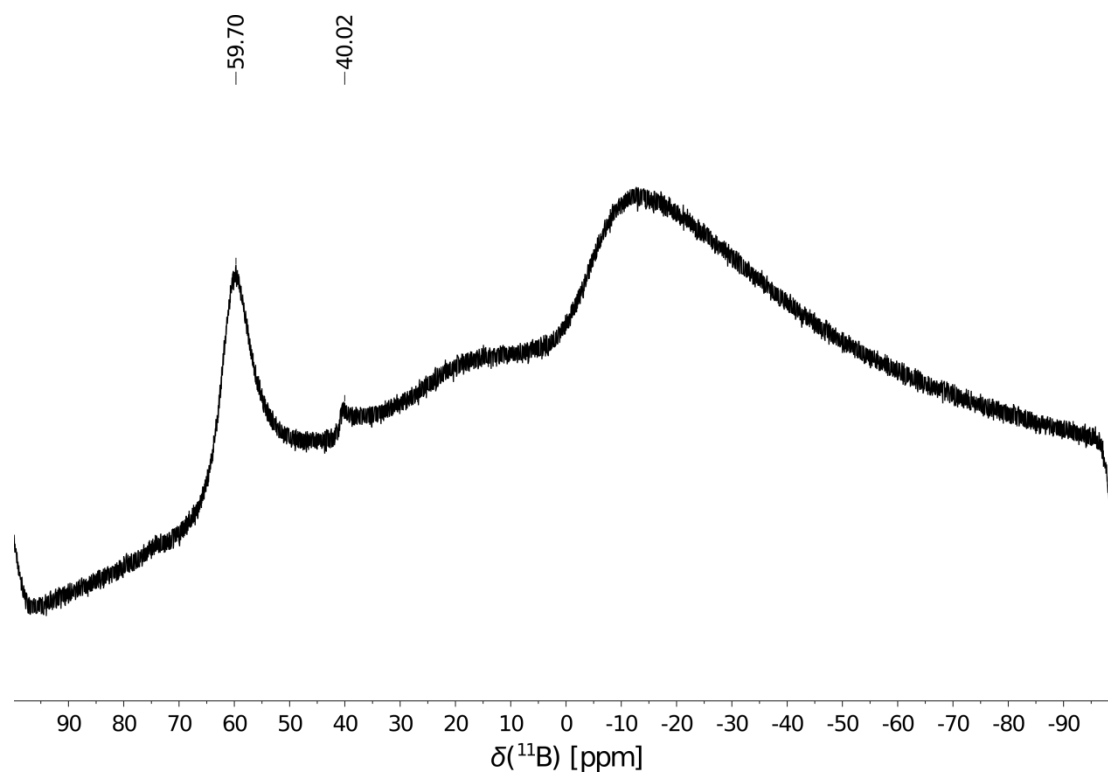

**Figure S33.**  $^{11}\text{B}$  NMR spectrum (160 MHz,  $\text{C}_6\text{D}_6$ ) of tris(*para*-chlorotetrafluorophenyl)borane (**7**).

**2,2,6,6-Tetramethylpiperidinium tris(*para*-chlorotetrafluorophenyl)hydrido-boranate ([7-H][H-TMP])**

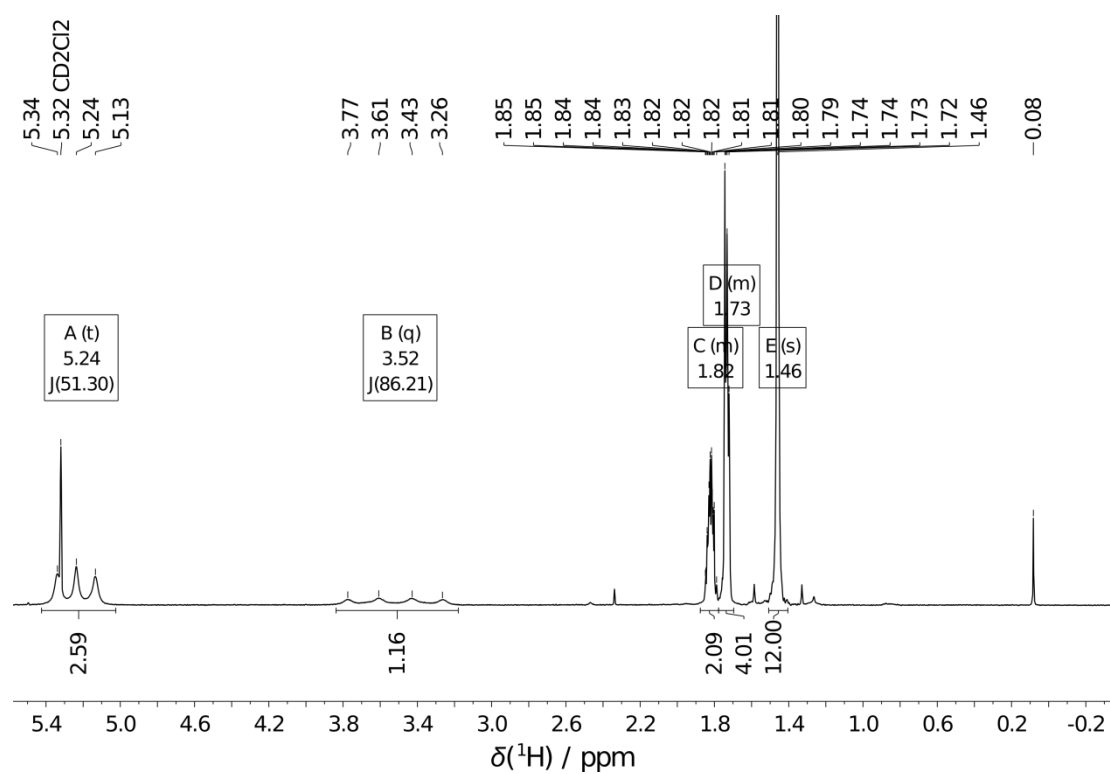

**Figure S34.**  $^1\text{H}$  NMR spectrum (500 MHz,  $\text{CD}_2\text{Cl}_2$ ) of [7-H][H-TMP].

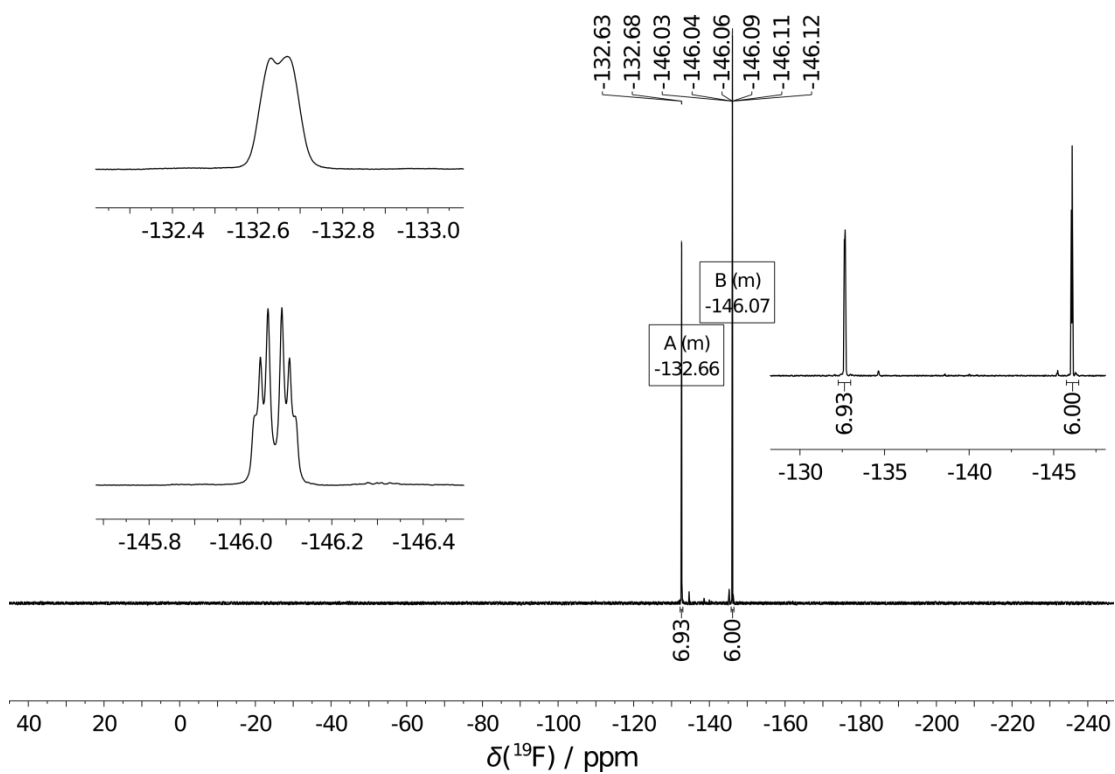

Figure S35.  $^{19}\text{F}$  NMR spectrum (471 MHz,  $\text{CD}_2\text{Cl}_2$ ) of [7-H][H-TMP].

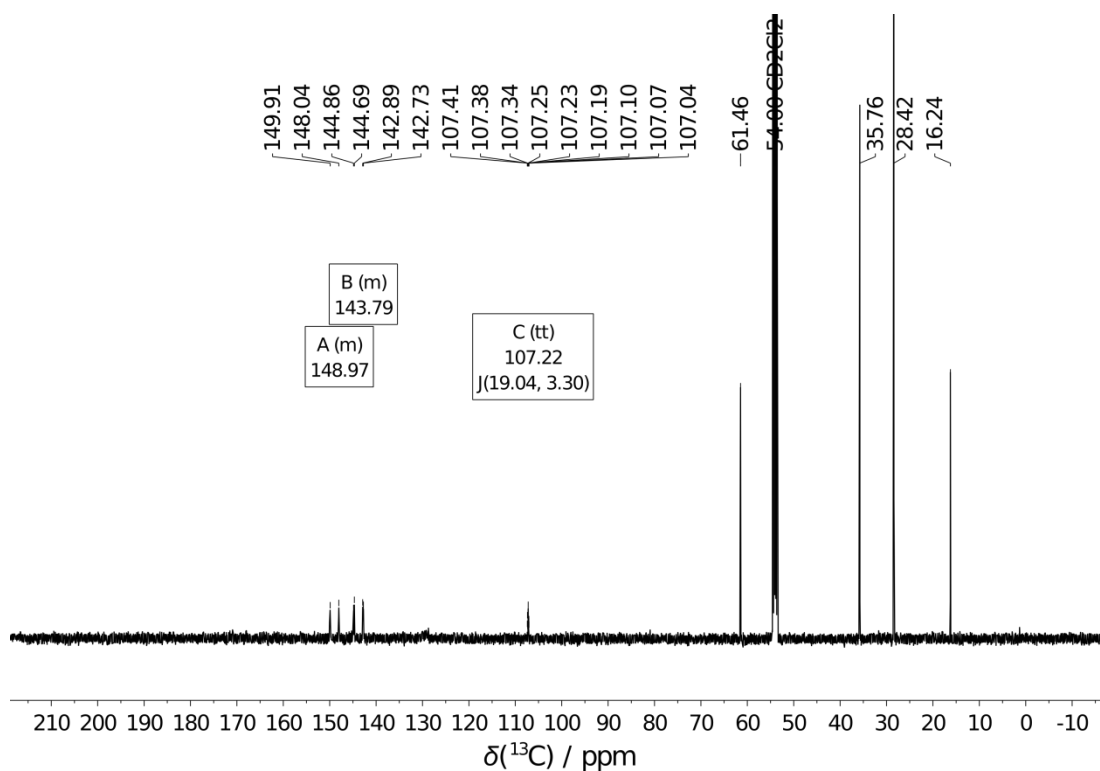

Figure S36. Full  $^{13}\text{C}\{^1\text{H}\}$  NMR spectrum (126 MHz,  $\text{CD}_2\text{Cl}_2$ ) of [7-H][H-TMP].

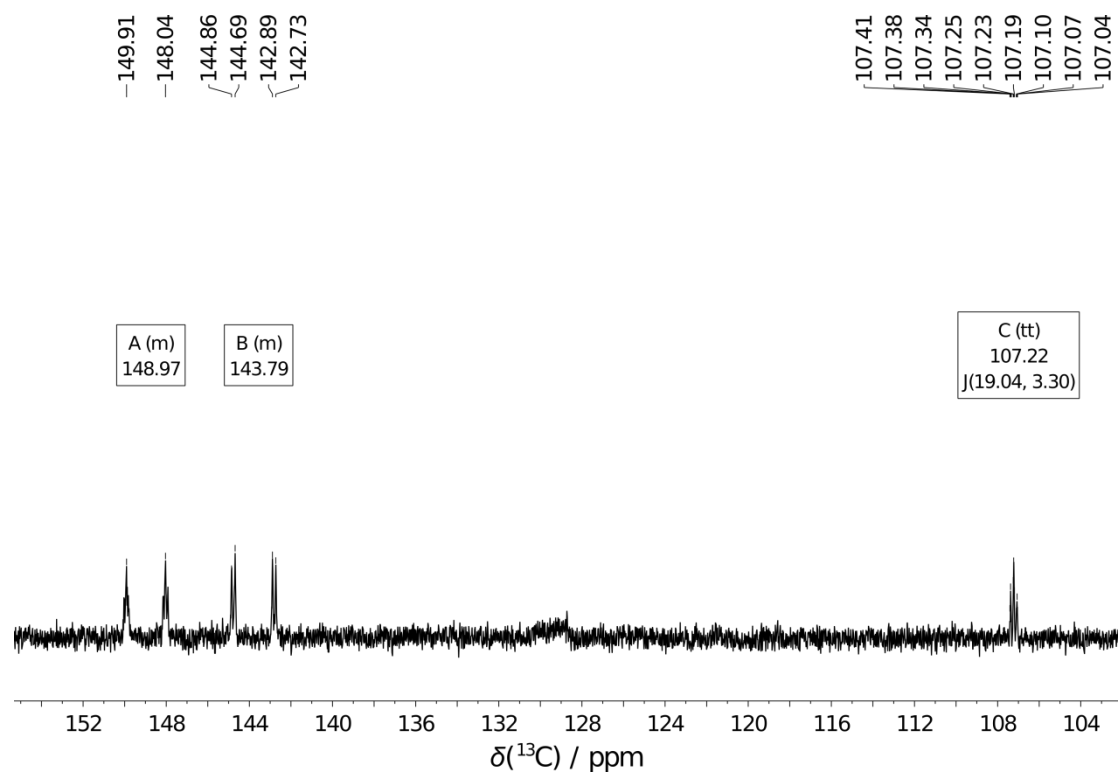

**Figure S37.** Excerpt of the  $^{13}\text{C}\{^1\text{H}\}$  NMR spectrum (126 MHz,  $\text{CD}_2\text{Cl}_2$ ) of [7-H][H-TMP].

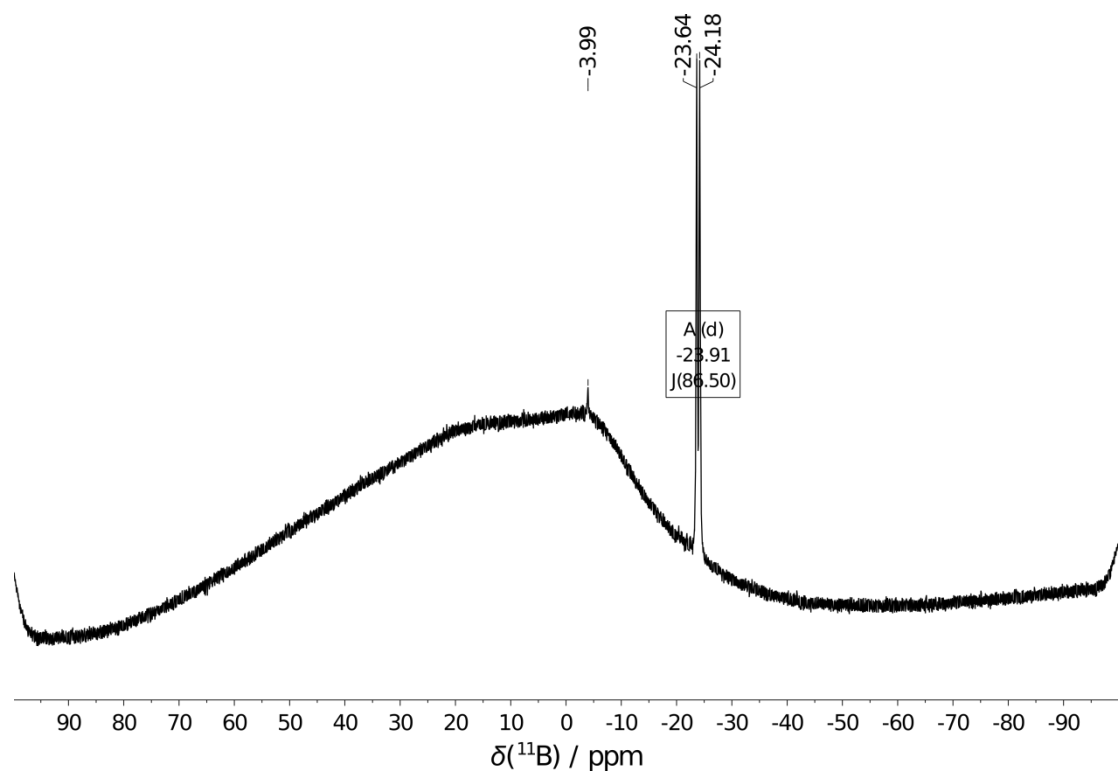

**Figure S38.**  $^{11}\text{B}$  NMR spectrum (160 MHz,  $\text{CD}_2\text{Cl}_2$ ) of [7-H][H-TMP].

### 1,2-Bis(bis(*para*-chlorotetrafluorophenyl)boryl)benzene (**8**)

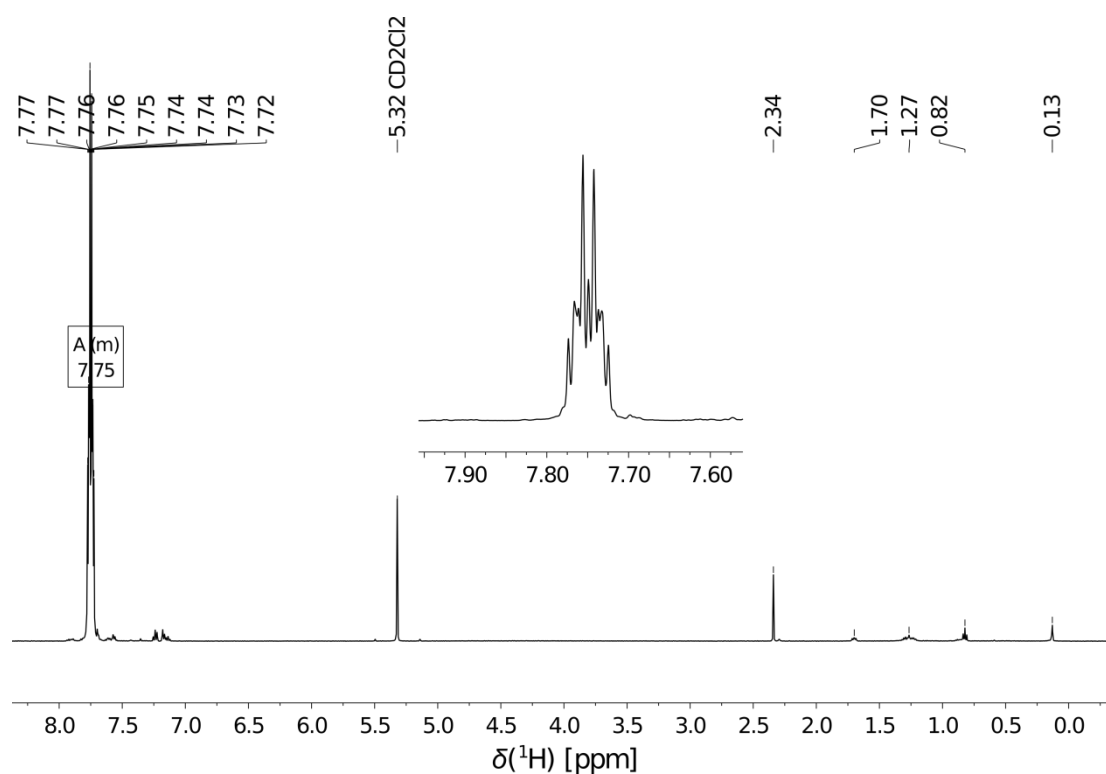

**Figure S39.** <sup>1</sup>H NMR spectrum (500 MHz, CD<sub>2</sub>Cl<sub>2</sub>) of **8** containing traces of toluene.

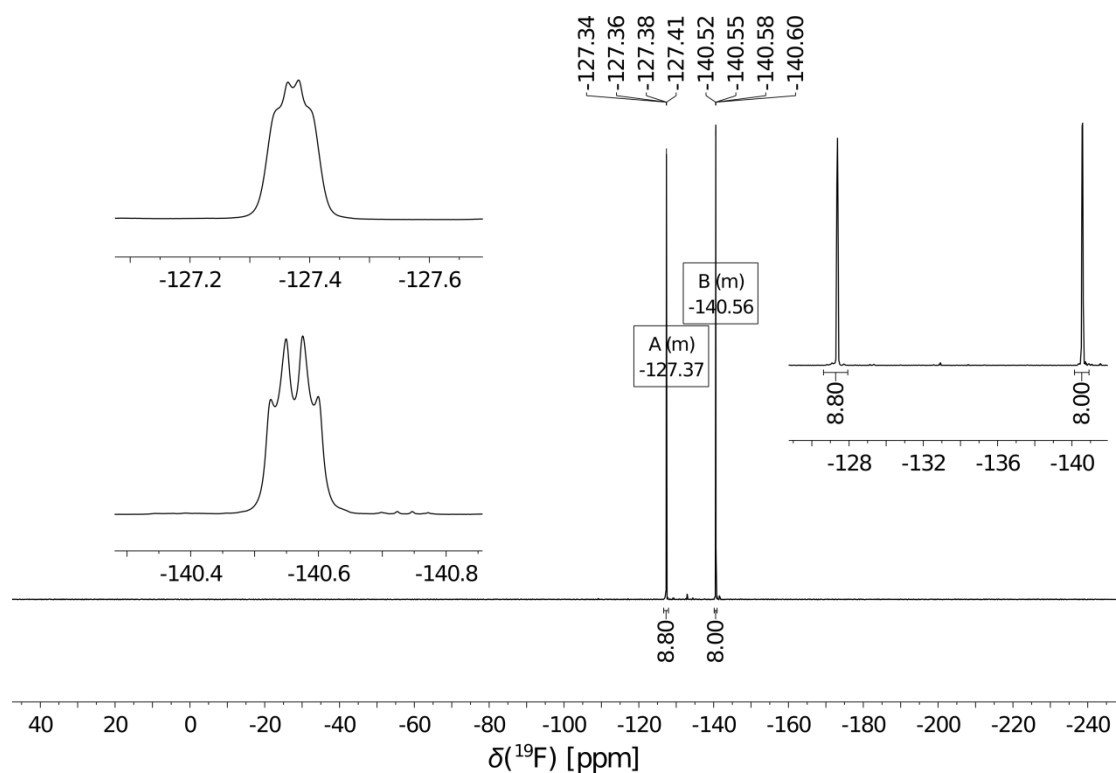

**Figure S40.** <sup>19</sup>F NMR spectrum (471 MHz, CD<sub>2</sub>Cl<sub>2</sub>) of **8**.

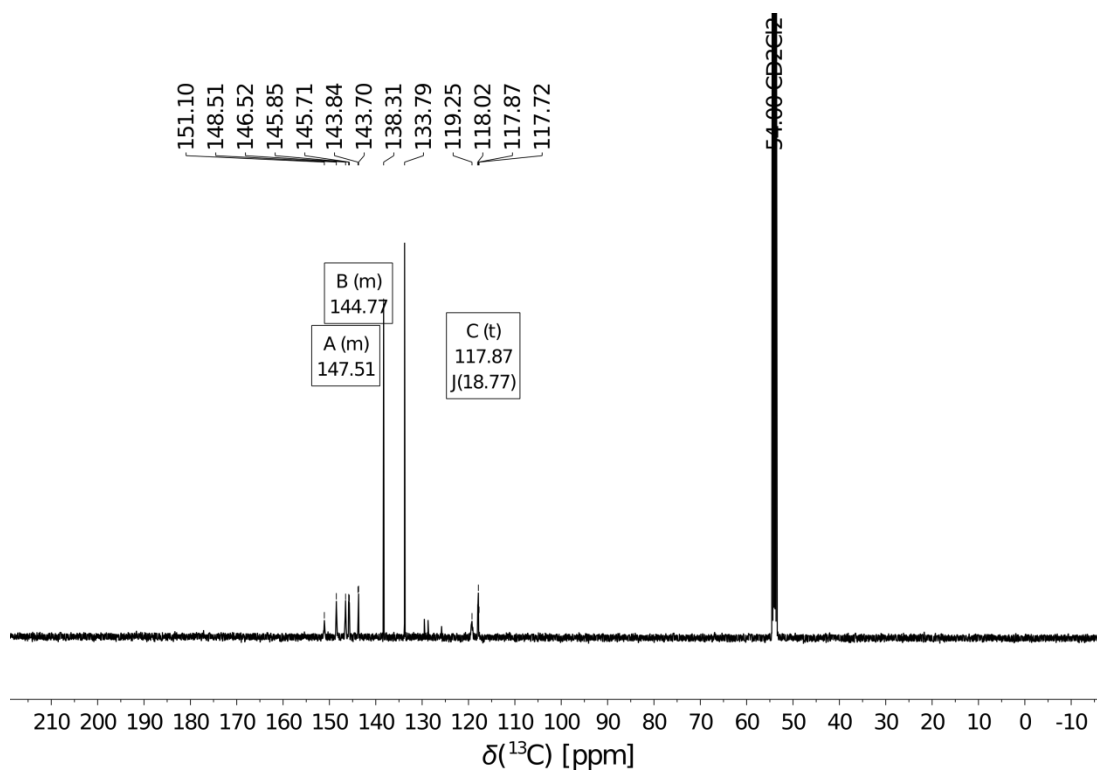

**Figure S41.** Full  $^{13}\text{C}\{^1\text{H}\}$  NMR spectrum (126 MHz,  $\text{CD}_2\text{Cl}_2$ ) of **8** containing traces of toluene.

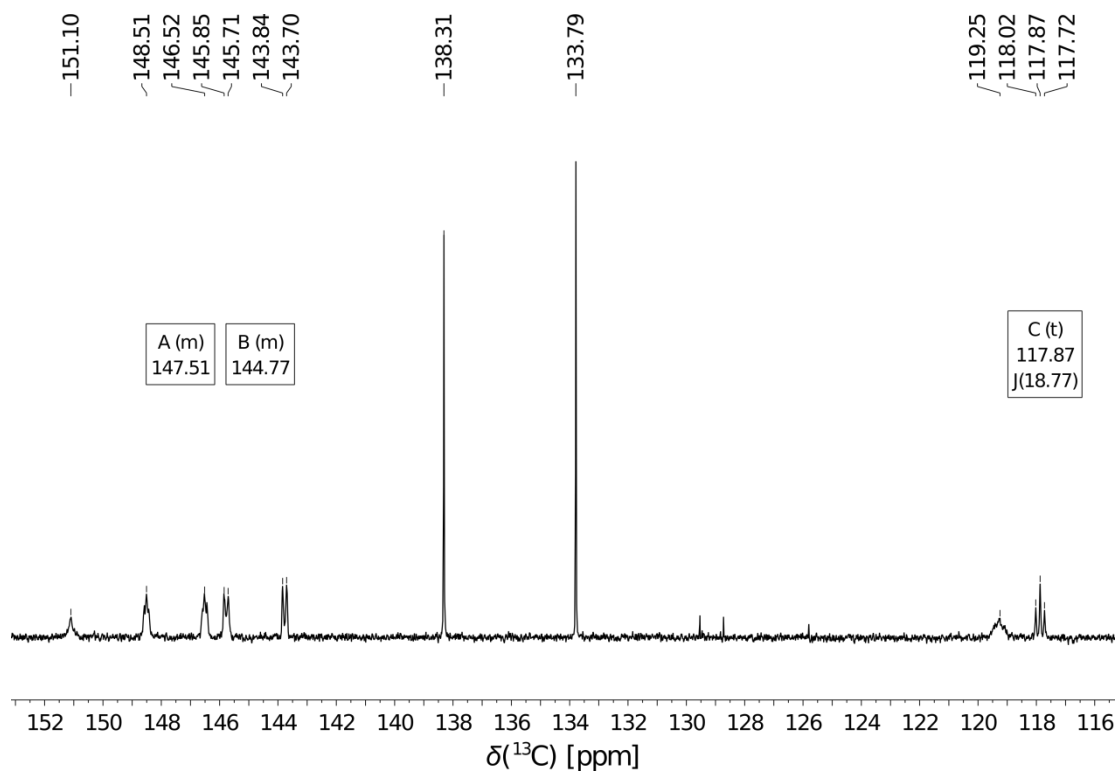

**Figure S42.** Excerpt of the  $^{13}\text{C}\{^1\text{H}\}$  NMR spectrum (126 MHz,  $\text{CD}_2\text{Cl}_2$ ) of **8** containing traces of toluene.

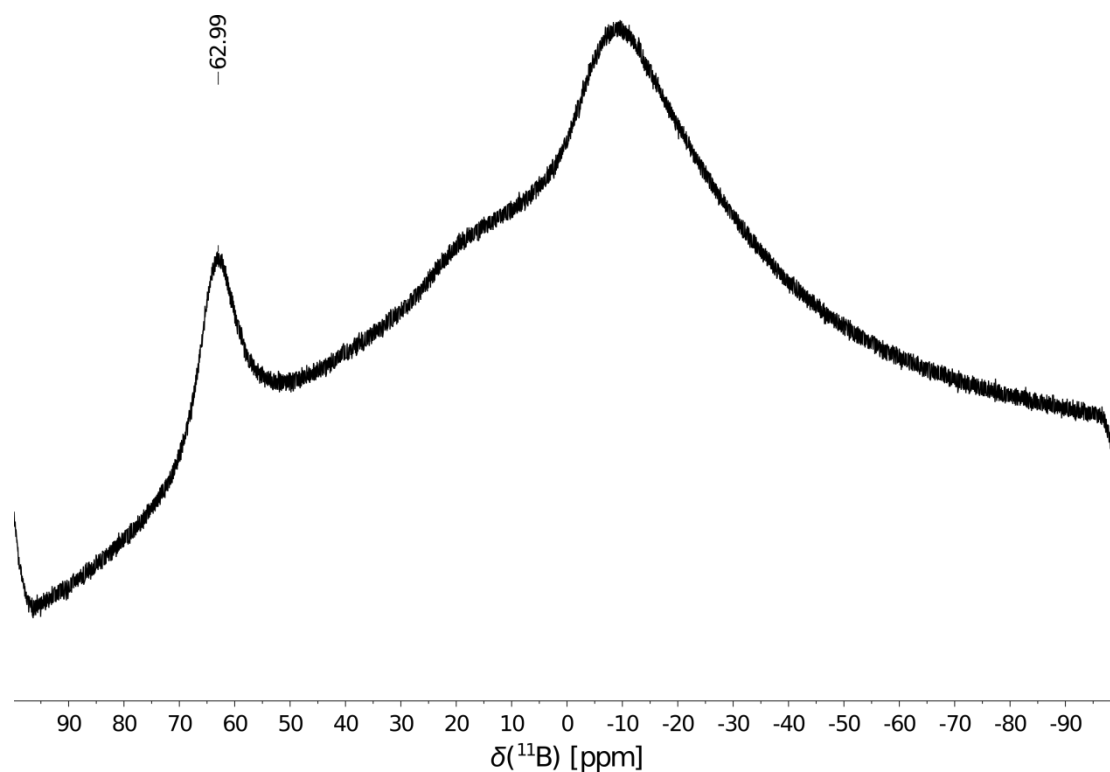

Figure S43.  $^{11}\text{B}$  NMR spectrum (160 MHz,  $\text{CD}_2\text{Cl}_2$ ) of **8**.

### 1,8-Bis(dichloroboryl)naphthalene

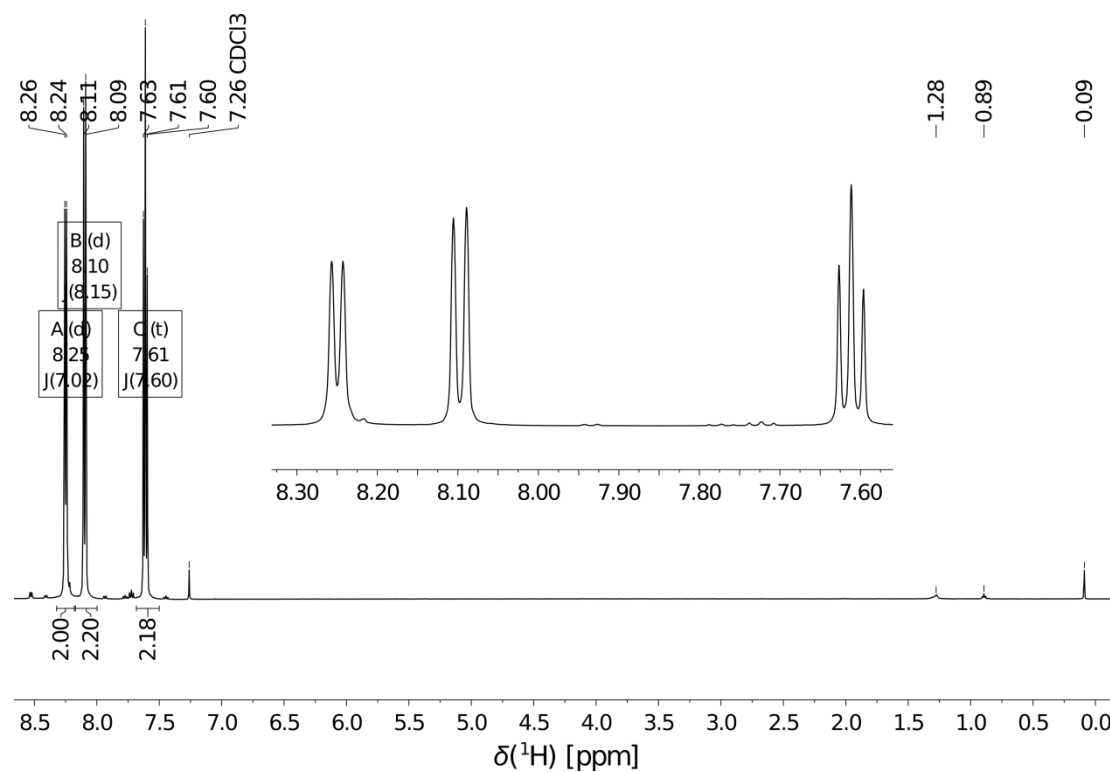

Figure S44.  $^1\text{H}$  NMR spectrum (500 MHz,  $\text{CDCl}_3$ ) of 1,8-bis(dichloroboryl)naphthalene.

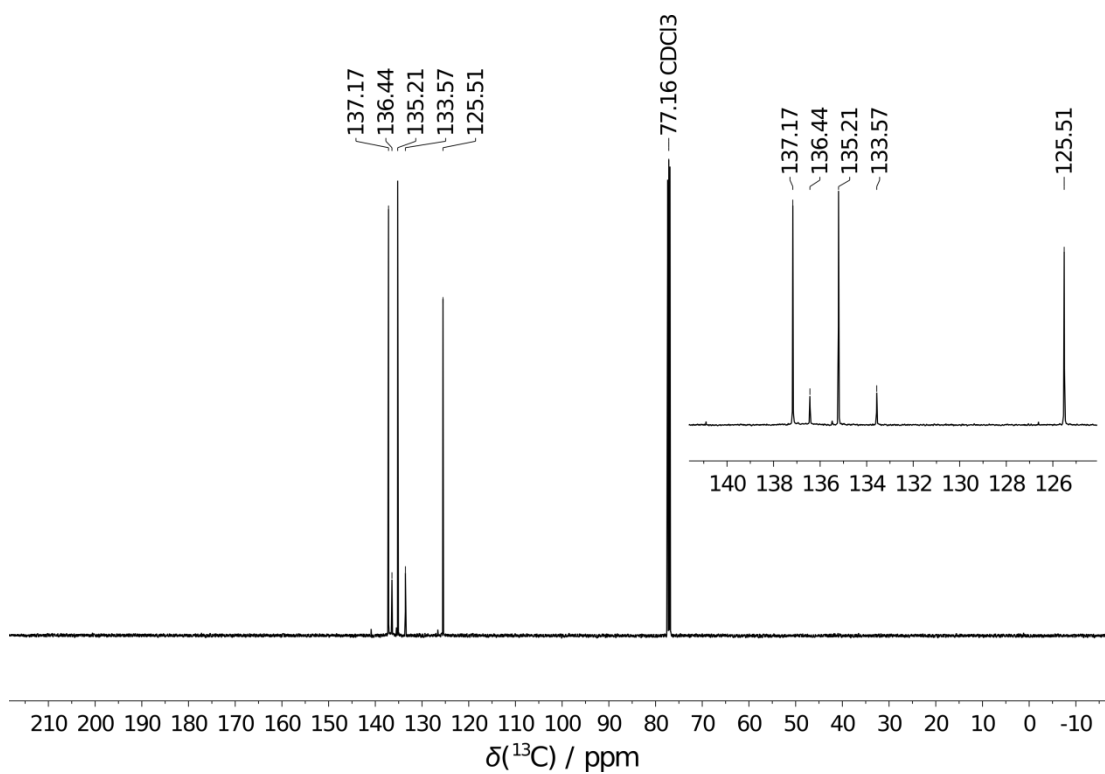

**Figure S45.**  $^{13}\text{C}\{^1\text{H}\}$  NMR spectrum (126 MHz, CDCl<sub>3</sub>) of 1,8-bis(dichloroboryl)naphthalene.

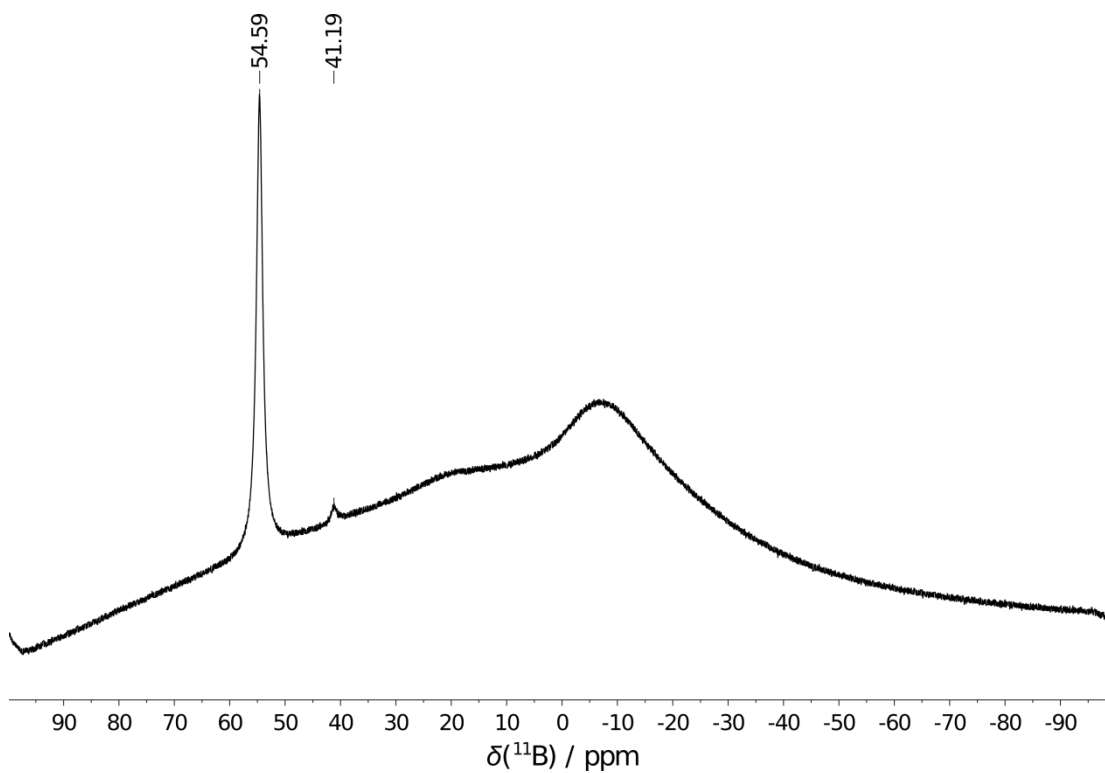

**Figure S46.**  $^{11}\text{B}$  NMR spectrum (160 MHz, CDCl<sub>3</sub>) of 1,8-bis(dichloroboryl)naphthalene.



# 1,2-Bis(bis(*para*-chlorotetrafluorophenyl)boryl)naphthalene (**9**)

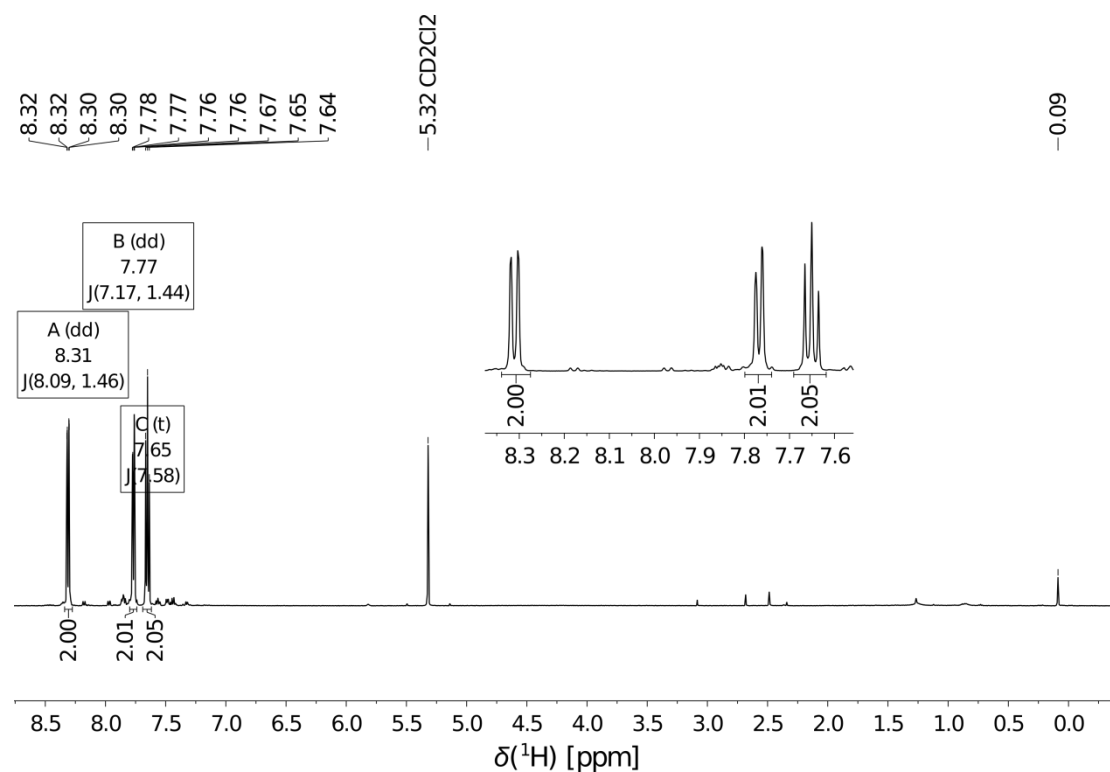

Figure S47. <sup>1</sup>H NMR spectrum (500 MHz, CD<sub>2</sub>Cl<sub>2</sub>) of **9**.

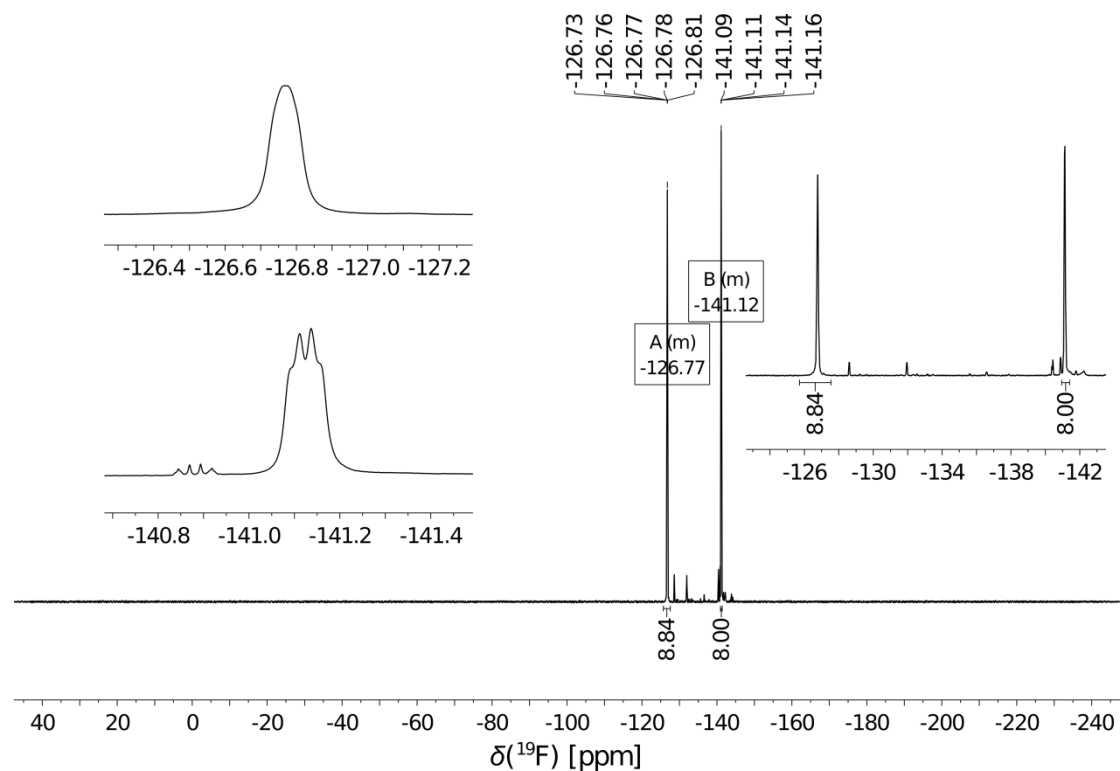

Figure S48. <sup>19</sup>F NMR spectrum (471 MHz, CD<sub>2</sub>Cl<sub>2</sub>) of **9**.

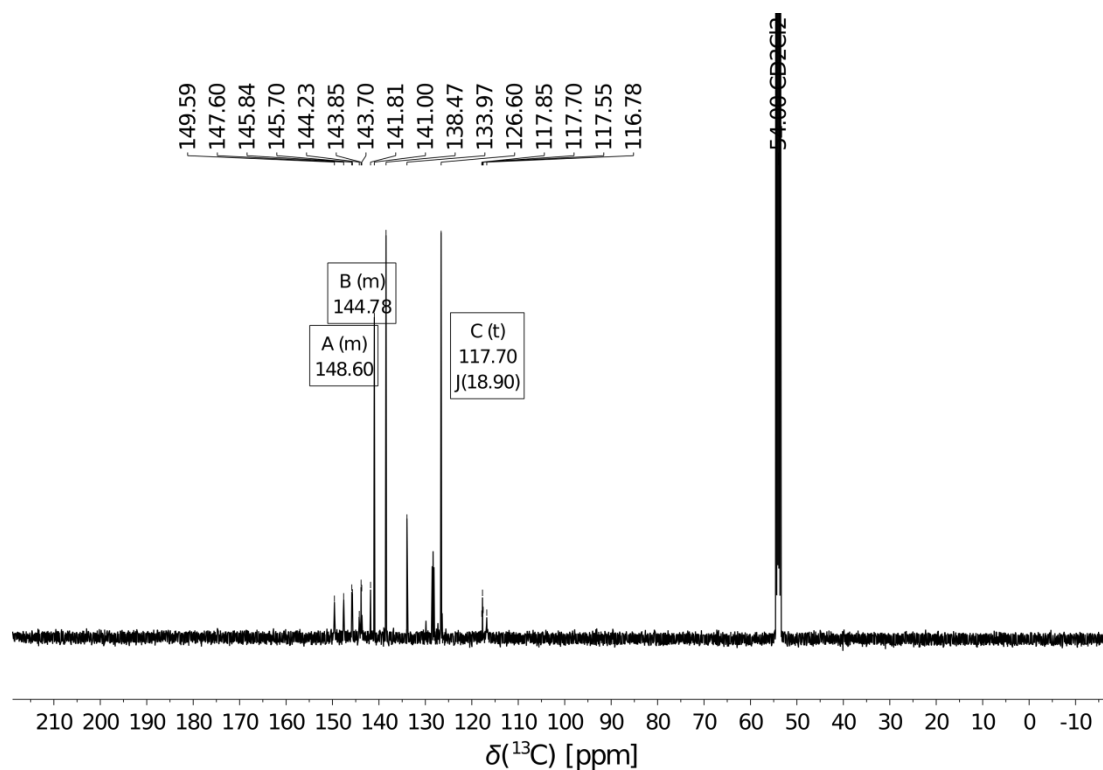

**Figure S49.** Full  $^{13}\text{C}\{^1\text{H}\}$  NMR spectrum (126 MHz,  $\text{CD}_2\text{Cl}_2$ ) of **9** containing traces of  $\text{C}_6\text{D}_6$ .

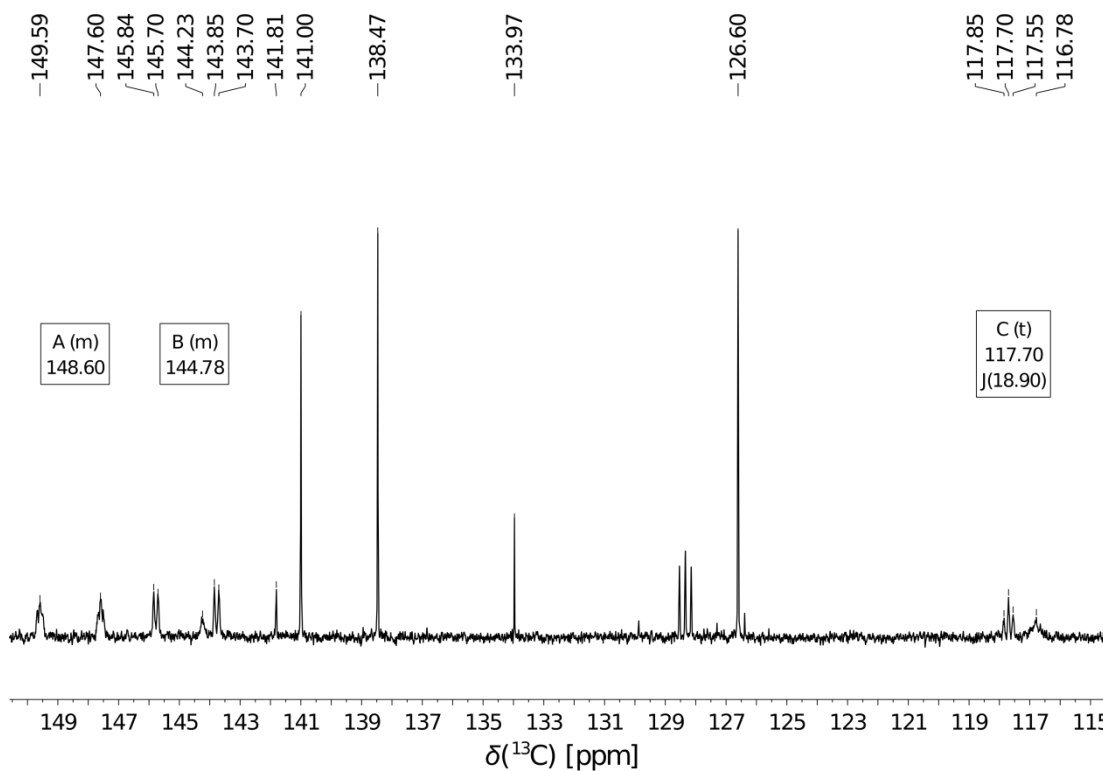

**Figure S50.** Excerpt of the  $^{13}\text{C}\{^1\text{H}\}$  NMR spectrum (126 MHz,  $\text{CD}_2\text{Cl}_2$ ) of **9** containing traces of  $\text{C}_6\text{D}_6$ .

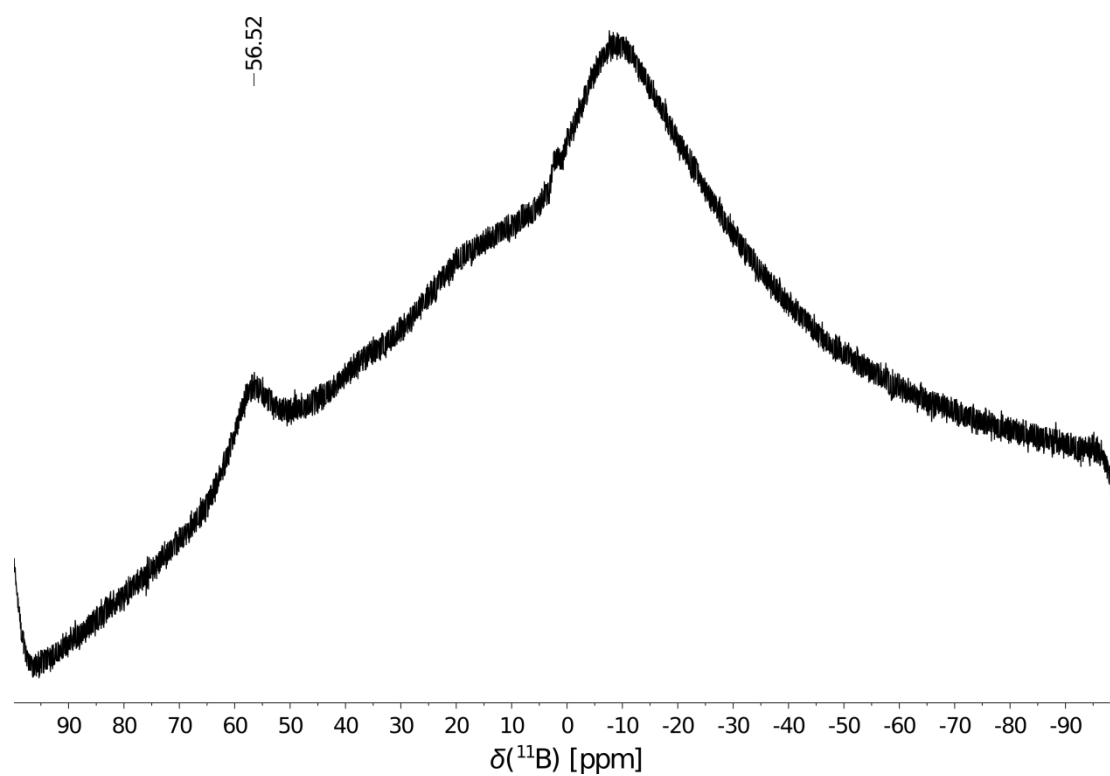

**Figure S51.**  $^{11}\text{B}$  NMR spectrum (160 MHz,  $\text{CD}_2\text{Cl}_2$ ) of **9**.

## UV/Vis and IR spectra of tris (*para*-chlorotetrafluorophenyl)borane (7)

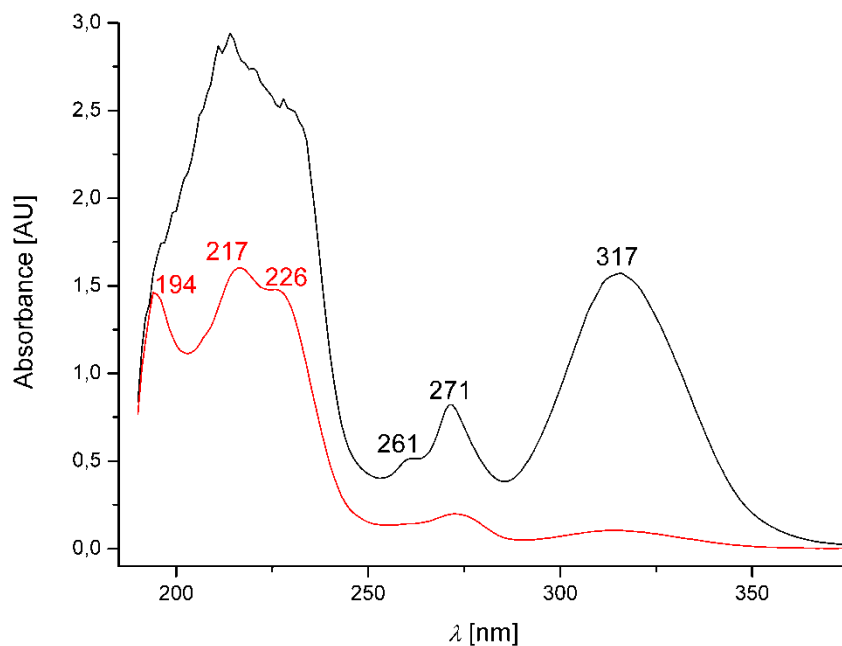

**Figure S52.** UV/Vis spectra of tris(*para*-chlorotetrafluorophenyl)borane (7) in *n*-hexane at two different concentrations (approx. range 10–200  $\mu\text{mol L}^{-1}$ ). Solvent background was subtracted before data processing. No significant absorption was found between 375 and 1100 nm. Recorded on a Agilent 8453 UV-vis spectrometer (Agilent Technologies, Germany), which was equipped with an eight-position cuvette holder and a diode array detector system.

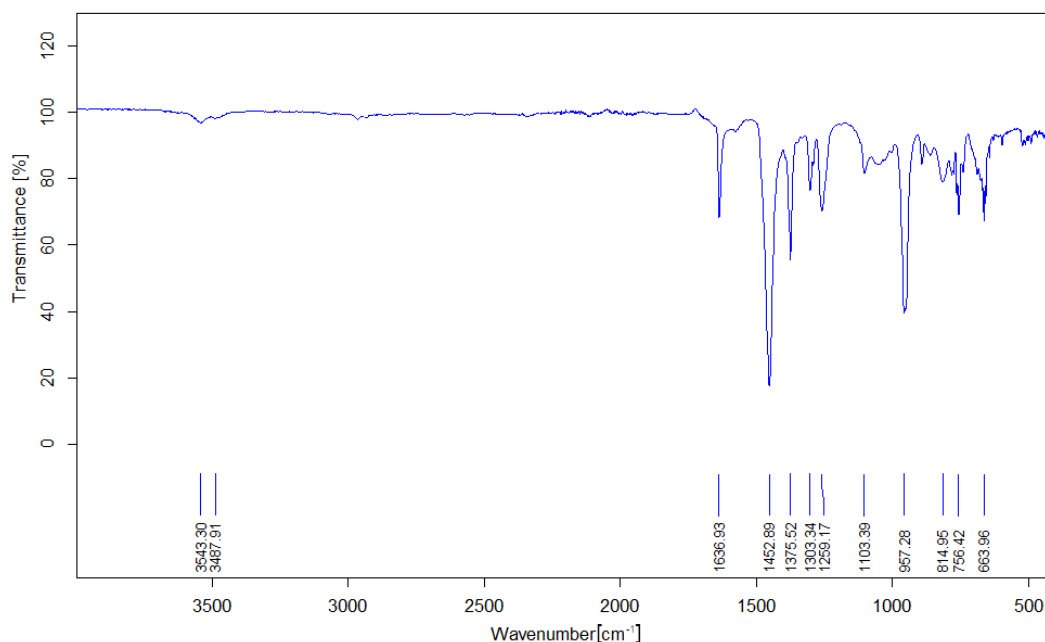

**Figure S53.** IR spectrum of 7 (solid state) from the evaporation of a solution in dichloromethane. Slight contamination is due to saturated hydrocarbons originating from the use of plastic syringes. Recorded on a Bruker Alpha Platinum ATR spectrometer (Bruker Corporation).

## Data of the Gutmann Beckett tests

**Table S1.** Calculated concentration ratios  $[\text{OPEt}_3]/[\text{R}_3\text{B}]$  and corresponding  $^{31}\text{P}$  NMR shifts for  $\text{CD}_2\text{Cl}_2$  as the solvent.

| $[\text{OPEt}_3]/[(p\text{-ClF}_4\text{C}_6)_3\text{B}]$ | $\delta(^{31}\text{P})$ [ppm] | $[\text{OPEt}_3]/[(\text{F}_5\text{C}_6)_3\text{B}]$ | $\delta(^{31}\text{P})$ [ppm] |
|----------------------------------------------------------|-------------------------------|------------------------------------------------------|-------------------------------|
| 0.110                                                    | 77.49                         | 0.103                                                | 76.96                         |
| 0.330                                                    | 77.50                         | 0.303                                                | 76.97                         |
| 0.667                                                    | 77.51                         | 0.625                                                | 76.98                         |
| 0.990                                                    | 77.52                         | 0.971                                                | 76.99                         |

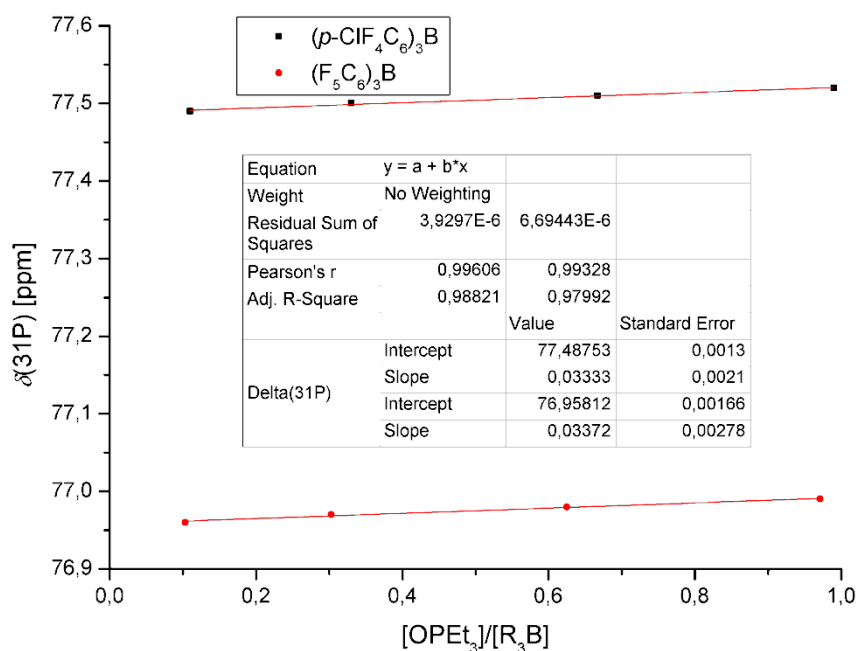

**Figure S54.** Graphical representation of the values presented in table S1 alongside the data of the derived linear fits (solvent:  $\text{CD}_2\text{Cl}_2$ ).

**Table S2.** Calculated concentration ratios  $[\text{OPEt}_3]/[\text{R}_3\text{B}]$  and corresponding  $^{31}\text{P}$  NMR shifts for  $\text{C}_6\text{D}_6$  as the solvent.

| $[\text{OPEt}_3]/[(p\text{-ClF}_4\text{C}_6)_3\text{B}]$ | $\delta(^{31}\text{P})$ [ppm] | $[\text{OPEt}_3]/[(\text{F}_5\text{C}_6)_3\text{B}]$ | $\delta(^{31}\text{P})$ [ppm] |
|----------------------------------------------------------|-------------------------------|------------------------------------------------------|-------------------------------|
| 0.120                                                    | 75.73                         | 0.0571                                               | 75.20                         |
| 0.252                                                    | 75.76                         | 0.256                                                | 75.25                         |
| 0.516                                                    | 75.80                         | 0.505                                                | 75.29                         |
| 0.800                                                    | 75.80                         | 0.826                                                | 75.32                         |

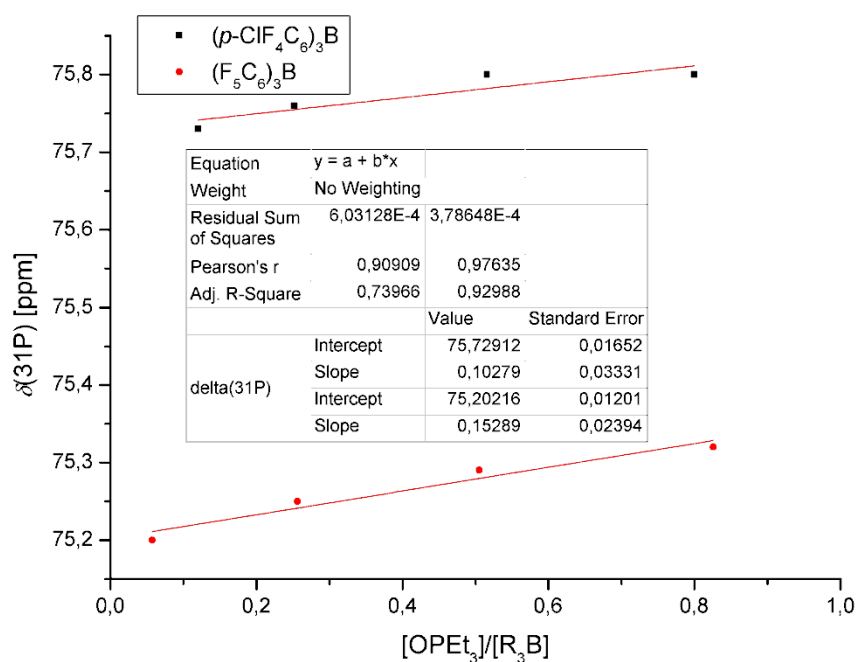

**Figure S55.** Graphical representation of the values presented in Table S2 alongside the data of the derived linear fits (solvent: C<sub>6</sub>D<sub>6</sub>).

## Crystallographic Details

Single crystals were examined on a Rigaku Supernova diffractometer. Using Olex2,<sup>[1]</sup> the structures were solved with the ShelXT<sup>[2]</sup> structure solution program using Intrinsic Phasing and refined with the ShelXL<sup>[3]</sup> refinement package using Least Squares minimisation if not otherwise stated. All hydrogen atoms were refined isotropically except the carbon bonded in [7-H][H-TMP]. In **1** the nitrogen atom doesn't lie at the crystallographic two-fold axis and is thus disordered in ratio 1:1. In **2** the chlorine and bromine atoms share nearly the same site, ratio 1:1. The entire molecule of **3** is disordered at a center of inversion with ratio 1:1. The crystal of **4** was twinned, the ratio of the two domains was 80:20. Component 2 rotated by  $-180.0^\circ$  around  $[-0.41 -0.00 0.91]$  (reciprocal) or  $[0.00 0.00 1.00]$  (direct). The structure of **7**·OPe<sub>3</sub> was refined with the olex2.refine refinement package using Levenberg-Marquardt minimization. NoSpherA2 was used, an implementation of Non-SPHERical Atom-form-factors in Olex2.<sup>[4]</sup> NoSpherA2 implementation of HAR makes use of tailor-made aspherical atomic form factors calculated on-the-fly from a Hirshfeld-partitioned electron density (ED) – not from spherical-atom form factors. The ED is calculated from a Gaussian basis set single determinant SCF wave-function - either Hartree-Fock or DFT using selected functionals – for a fragment of the crystal. This fragment can be embedded in an electrostatic crystal field by employing cluster charges. The following options were used: SOFTWARE: ORCA PARTITIONING: NoSpherA2 INT ACCURACY: Normal METHOD: M062X BASIS SET: def2-TZVPP CHARGE: 0 MULTIPLICITY: 1. The chlorine atom was refined with anharmonic thermal vibration. The two solvent toluene molecules in [7-H][H-TMP] are disordered with different ratios, suitable restraints were applied. Crystal was a 1:1 inversion twin. The structure could not be refined in the centrosymmetric space group  $P\bar{1}$  reasonably, the cations and the toluene molecules show heavy disorder in this space group, the  $R_1$  value increases to ca. 20%. A non-merohedral twinning could not be detected. Details of the X-ray investigation are given in Table S3–S6. CCDC 2149933–2149943 contain the supplementary crystallographic data for this paper. These data can be obtained free of charge from The Cambridge Crystallographic Data Centre via [www.ccdc.cam.ac.uk/conts/retrieving.html](http://www.ccdc.cam.ac.uk/conts/retrieving.html).

1. O. V. Dolomanov, L. J. Bourhis, R. J. Gildea, J. A. K. Howard, H. Puschmann, *J. Appl. Crystallogr.* **2009**, *42*, 339–341.
2. G. M. Sheldrick, *Acta Crystallogr.* **2015**, *A71*, 3–8.
3. G. M. Sheldrick, *Acta Crystallogr.* **2015**, *C71*, 3–8.
4. F. Kleemiss, O. V. Dolomanov, M. Bodensteiner, N. Peyerimhoff, L. Midgley, L. J. Bourhis, A. Genoni, L. A. Malaspina, D. Jayatilaka, J. L. Spencer, F. White, B. Grundkötter-Stock, S. Steinhauer, D. Lentz, H. Puschmann, S. Grabowsky, *Chem. Sci.*, **2021**, *12*, 1675–1692.

**Table S3.** Crystallographic data of compounds **1**, **2** and **3**.

| Compound                                                                                  | <b>1</b>                                         | <b>2</b>                           | <b>3</b>                          |
|-------------------------------------------------------------------------------------------|--------------------------------------------------|------------------------------------|-----------------------------------|
| <b>Empirical formula</b>                                                                  | C <sub>6</sub> H <sub>2</sub> ClF <sub>4</sub> N | C <sub>6</sub> F <sub>4</sub> ClBr | C <sub>6</sub> ClF <sub>4</sub> I |
| <b><i>M<sub>r</sub></i></b>                                                               | 199.54                                           | 263.42                             | 310.41                            |
| <b>Radiation Source</b>                                                                   | MoK $\alpha$                                     | MoK $\alpha$                       | MoK $\alpha$                      |
| <b><math>\lambda</math> (Å)</b>                                                           | 0.71073                                          | 0.71073                            | 0.71073                           |
| <b><i>T</i> / K</b>                                                                       | 100.0(1)                                         | 100.0(1)                           | 95.0(1)                           |
| <b><i>F</i>(000)</b>                                                                      | 392                                              | 248                                | 284                               |
| <b>Crystal system</b>                                                                     | monoclinic                                       | monoclinic                         | monoclinic                        |
| <b>Space group</b>                                                                        | <i>C2/c</i>                                      | <i>C2/m</i>                        | <i>P2<sub>1</sub>/c</i>           |
| <b><i>a</i> [Å]</b>                                                                       | 7.4856(2)                                        | 9.0190(5)                          | 5.85998(13)                       |
| <b><i>b</i> [Å]</b>                                                                       | 14.3043(2)                                       | 7.6651(3)                          | 6.03279(14)                       |
| <b><i>c</i> [Å]</b>                                                                       | 6.6735(2)                                        | 5.2231(2)                          | 11.1548(3)                        |
| <b><math>\alpha</math> [Å]</b>                                                            | 90                                               | 90                                 | 90                                |
| <b><math>\beta</math> [Å]</b>                                                             | 112.474(4)                                       | 97.920(5)                          | 94.708(2)                         |
| <b><math>\gamma</math> [Å]</b>                                                            | 90                                               | 90                                 | 90                                |
| <b><i>V</i> [Å<sup>3</sup>]</b>                                                           | 660.30(3)                                        | 357.64(3)                          | 393.015(16)                       |
| <b><i>Z</i></b>                                                                           | 4                                                | 2                                  | 2                                 |
| <b><math>\rho_{\text{calcd.}}</math> [g cm<sup>-3</sup>]</b>                              | 2.007                                            | 2.446                              | 2.623                             |
| <b><math>\mu</math> [mm<sup>-1</sup>]</b>                                                 | 0.590                                            | 6.125                              | 4.419                             |
| <b>2<math>\theta</math> range [°]</b>                                                     | 5.696 – 72.852                                   | 7.004 – 64.118                     | 6.976 – 73.78                     |
| <b>Index range <i>h</i></b>                                                               | -12 ≤ <i>h</i> ≤ 12                              | -13 ≤ <i>h</i> ≤ 12                | -9 ≤ <i>h</i> ≤ 9                 |
| <b>Index range <i>k</i></b>                                                               | -23 ≤ <i>k</i> ≤ 23                              | -11 ≤ <i>k</i> ≤ 11                | -10 ≤ <i>k</i> ≤ 9                |
| <b>Index range <i>l</i></b>                                                               | -11 ≤ <i>l</i> ≤ 11                              | -7 ≤ <i>l</i> ≤ 7                  | -18 ≤ <i>l</i> ≤ 18               |
| <b>Refl. collect.</b>                                                                     | 10105                                            | 11243                              | 12071                             |
| <b>Indep. refl.</b>                                                                       | 1574                                             | 649                                | 1904                              |
| <b><i>R</i><sub>int</sub></b>                                                             | 0.0241                                           | 0.0497                             | 0.0280                            |
| <b>Refl. with <i>I</i> &gt; 2<math>\sigma</math>(<i>I</i>)</b>                            | 1439                                             | 581                                | 1598                              |
| <b>Data/restraints/<br/>parameters</b>                                                    | 1574/0/65                                        | 649/0/33                           | 1904/0/110                        |
| <b><i>R</i><sub>1</sub>, <i>I</i> &gt; 2<math>\sigma</math>(<i>I</i>) / all data</b>      | 0.0247 / 0.0276                                  | 0.0320 / 0.0383                    | 0.0198 / 0.0264                   |
| <b><i>wR</i><sub>2</sub>, <i>I</i> &gt; 2<math>\sigma</math>(<i>I</i>) / all<br/>data</b> | 0.0727 / 0.0747                                  | 0.0750 / 0.0789                    | 0.0440 / 0.0470                   |
| <b>GoF</b>                                                                                | 1.067                                            | 1.109                              | 1.069                             |
| <b><math>\rho_{\text{max/min}}</math> [e Å<sup>-3</sup>]</b>                              | 0.60/-0.21                                       | 0.97/-1.00                         | 0.35/-0.34                        |
| <b>CCDC</b>                                                                               | 2149933                                          | 2149934                            | 2149935                           |



**Table S4.** Crystallographic data of compounds **4**, **5** and **7·OEt<sub>2</sub>**.

| Compound                                       | <b>4</b>                                                         | <b>5</b>                                        | <b>7·OEt<sub>2</sub></b>                                           |
|------------------------------------------------|------------------------------------------------------------------|-------------------------------------------------|--------------------------------------------------------------------|
| <b>Empirical formula</b>                       | C <sub>14</sub> H <sub>6</sub> Cl <sub>2</sub> F <sub>8</sub> Sn | BCl <sub>2</sub> Cl <sub>3</sub> F <sub>8</sub> | C <sub>22</sub> H <sub>10</sub> BCl <sub>3</sub> F <sub>12</sub> O |
| <b>M<sub>r</sub></b>                           | 515.78                                                           | 413.28                                          | 635.46                                                             |
| <b>Radiation Source</b>                        | MoKα                                                             | CuKα                                            | MoKα                                                               |
| <b>λ (Å)</b>                                   | 0.71073                                                          | 1.54184                                         | 0.71073                                                            |
| <b>T / K</b>                                   | 100.0(1)                                                         | 100.0(1)                                        | 100.0(1)                                                           |
| <b>F(000)</b>                                  | 492                                                              | 1600                                            | 2512                                                               |
| <b>Crystal system</b>                          | triclinic                                                        | monoclinic                                      | tetragonal                                                         |
| <b>Space group</b>                             | <i>P</i> $\bar{1}$                                               | <i>P</i> 2 <sub>1</sub> / <i>c</i>              | <i>P</i> 4 <sub>2</sub> 1 <i>c</i>                                 |
| <b>a [Å]</b>                                   | 8.0625(3)                                                        | 26.726(3)                                       | 16.90978(13)                                                       |
| <b>b [Å]</b>                                   | 8.4539(3)                                                        | 6.2568(6)                                       | 16.90978(13)                                                       |
| <b>c [Å]</b>                                   | 12.5784(4)                                                       | 16.8800(17)                                     | 16.8969(2)                                                         |
| <b>α [Å]</b>                                   | 77.556(3)                                                        | 90                                              | 90                                                                 |
| <b>β [Å]</b>                                   | 76.536(3)                                                        | 106.138(11)                                     | 90                                                                 |
| <b>γ [Å]</b>                                   | 87.824(3)                                                        | 90                                              | 90                                                                 |
| <b>V [Å<sup>3</sup>]</b>                       | 814.12(5)                                                        | 2711.4(5)                                       | 4831.52(10)                                                        |
| <b>Z</b>                                       | 2                                                                | 8                                               | 8                                                                  |
| <b>ρ<sub>calcd.</sub> [g cm<sup>-3</sup>]</b>  | 2.104                                                            | 2.025                                           | 1.747                                                              |
| <b>μ [mm<sup>-1</sup>]</b>                     | 1.976                                                            | 7.029                                           | 0.489                                                              |
| <b>2θ range [°]</b>                            | 5.368 – 60.052                                                   | 6.886 – 151.358                                 | 4.822 – 66.25                                                      |
| <b>Index range h</b>                           | -11 ≤ h ≤ 11                                                     | -33 ≤ h ≤ 33                                    | -26 ≤ h ≤ 26                                                       |
| <b>Index range k</b>                           | -11 ≤ k ≤ 11                                                     | -7 ≤ k ≤ 7                                      | -26 ≤ k ≤ 26                                                       |
| <b>Index range l</b>                           | -17 ≤ l ≤ 17                                                     | -20 ≤ l ≤ 20                                    | -25 ≤ l ≤ 25                                                       |
| <b>Refl. collect.</b>                          | 19022                                                            | 17368                                           | 229607                                                             |
| <b>Indep. refl.</b>                            | 4761                                                             | 6816                                            | 9187                                                               |
| <b>R<sub>int</sub></b>                         | 0.0409                                                           | 0.0443                                          | 0.0955                                                             |
| <b>Refl. with I &gt; 2σ(I)</b>                 | 4155                                                             | 5885                                            | 8075                                                               |
| <b>Data/restraints/ parameters</b>             | 4761/0/250                                                       | 6816/0/434                                      | 9187/0/392                                                         |
| <b>R<sub>1</sub>, I &gt; 2σ(I) / all data</b>  | 0.0273 / 0.0343                                                  | 0.0890 / 0.0998                                 | 0.0367 / 0.0458                                                    |
| <b>wR<sub>2</sub>, I &gt; 2σ(I) / all data</b> | 0.0549 / 0.0592                                                  | 0.2465 / 0.2582                                 | 0.0759 / 0.0794                                                    |
| <b>GoF</b>                                     | 1.067                                                            | 1.047                                           | 1.019                                                              |
| <b>ρ<sub>max/min</sub> [e Å<sup>-3</sup>]</b>  | 1.02/-0.46                                                       | 0.70/-0.81                                      | 0.76/-0.27                                                         |
| <b>Flack parameter</b>                         |                                                                  |                                                 | -0.026(15)                                                         |
| <b>CCDC</b>                                    | 2149936                                                          | 2149937                                         | 2149938                                                            |

**Table S5.** Crystallographic data of compounds **7**·OPe<sub>3</sub>, [7-H][H-TMP] and **8**.

| Compound                                                      | <b>7</b> ·OPe <sub>3</sub>                                          | [7-H][H-TMP]                                                       | <b>8</b>                                                                      |
|---------------------------------------------------------------|---------------------------------------------------------------------|--------------------------------------------------------------------|-------------------------------------------------------------------------------|
| <b>Empirical formula</b>                                      | C <sub>24</sub> H <sub>15</sub> BCl <sub>3</sub> F <sub>12</sub> OP | C <sub>34</sub> H <sub>29</sub> BCl <sub>3</sub> F <sub>12</sub> N | C <sub>30</sub> H <sub>4</sub> B <sub>2</sub> Cl <sub>4</sub> F <sub>16</sub> |
| <i>M<sub>r</sub></i>                                          | 695.522                                                             | 796.74                                                             | 831.75                                                                        |
| <b>Radiation Source</b>                                       | MoKα                                                                | CuKα                                                               | CuKα                                                                          |
| <i>λ</i> (Å)                                                  | 0.71073                                                             | 1.54184                                                            | 1.54184                                                                       |
| <i>T</i> / K                                                  | 100.0(1)                                                            | 100.0(1)                                                           | 100.0(1)                                                                      |
| <i>F</i> (000)                                                | 2080.1                                                              | 808                                                                | 812                                                                           |
| <b>Crystal system</b>                                         | trigonal                                                            | triclinic                                                          | triclinic                                                                     |
| <b>Space group</b>                                            | <i>R</i> $\bar{3}$                                                  | <i>P</i> 1                                                         | <i>P</i> $\bar{1}$                                                            |
| <i>a</i> [Å]                                                  | 13.13211(19)                                                        | 11.2083(3)                                                         | 10.6373(3)                                                                    |
| <i>b</i> [Å]                                                  | 13.13211(19)                                                        | 11.2423(3)                                                         | 12.0380(3)                                                                    |
| <i>c</i> [Å]                                                  | 26.3187(4)                                                          | 15.8165(3)                                                         | 13.5971(4)                                                                    |
| <i>α</i> [Å]                                                  | 90                                                                  | 92.226(2)                                                          | 106.375(2)                                                                    |
| <i>β</i> [Å]                                                  | 90                                                                  | 101.961(2)                                                         | 93.576(2)                                                                     |
| <i>γ</i> [Å]                                                  | 120                                                                 | 117.368(3)                                                         | 115.075(3)                                                                    |
| <i>V</i> [Å <sup>3</sup> ]                                    | 3930.65(10)                                                         | 1710.74(8)                                                         | 1479.57(8)                                                                    |
| <i>Z</i>                                                      | 6                                                                   | 2                                                                  | 2                                                                             |
| <i>ρ</i> <sub>calcd.</sub> [g cm <sup>-3</sup> ]              | 1.763                                                               | 1.547                                                              | 1.867                                                                         |
| <i>μ</i> [mm <sup>-1</sup> ]                                  | 0.517                                                               | 3.272                                                              | 4.827                                                                         |
| <b>2θ range</b> [°]                                           | 3.9 – 90.58                                                         | 5.782 – 152.782                                                    | 6.93 – 152.726                                                                |
| <b>Index range <i>h</i></b>                                   | –29 ≤ <i>h</i> ≤ 29                                                 | –13 ≤ <i>h</i> ≤ 14                                                | –12 ≤ <i>h</i> ≤ 13                                                           |
| <b>Index range <i>k</i></b>                                   | –29 ≤ <i>k</i> ≤ 28                                                 | –14 ≤ <i>k</i> ≤ 13                                                | –15 ≤ <i>k</i> ≤ 15                                                           |
| <b>Index range <i>l</i></b>                                   | –58 ≤ <i>l</i> ≤ 58                                                 | –19 ≤ <i>l</i> ≤ 19                                                | –16 ≤ <i>l</i> ≤ 17                                                           |
| <b>Refl. collect.</b>                                         | 124061                                                              | 37565                                                              | 25319                                                                         |
| <b>Indep. refl.</b>                                           | 7326                                                                | 12689                                                              | 6101                                                                          |
| <i>R</i> <sub>int</sub>                                       | 0.0470                                                              | 0.0392                                                             | 0.0229                                                                        |
| <b>Refl. with <i>I</i> &gt; 2σ(<i>I</i>)</b>                  | 6098                                                                | 11792                                                              | 5631                                                                          |
| <b>Data/restraints/ parameters</b>                            | 7326/6/192                                                          | 12689/548/1083                                                     | 6101/0/485                                                                    |
| <i>R</i> <sub>1</sub> , <i>I</i> > 2σ( <i>I</i> ) / all data  | 0.0232 / 0.0320                                                     | 0.0374 / 0.0416                                                    | 0.0270 / 0.0298                                                               |
| <i>wR</i> <sub>2</sub> , <i>I</i> > 2σ( <i>I</i> ) / all data | 0.0470 / 0.0497                                                     | 0.0938 / 0.0978                                                    | 0.0685 / 0.0704                                                               |
| <b>GoF</b>                                                    | 1.040                                                               | 1.033                                                              | 1.028                                                                         |
| <i>ρ</i> <sub>max/min</sub> [e Å <sup>-3</sup> ]              | 0.41/–0.29                                                          | 0.42/–0.29                                                         | 0.49/–0.31                                                                    |
| <b>Flack parameter</b>                                        |                                                                     | 0.5                                                                |                                                                               |
| <b>CCDC</b>                                                   | 2149939                                                             | 2149940                                                            | 21499341                                                                      |

**Table S6.** Crystallographic data of compounds 1,8-bis(dichloroboranyl)naphthalene and **9**.

| Compound                                                               | 1,8-bis(dichloroboranyl)naphthalene                           | <b>9</b>                                                                      |
|------------------------------------------------------------------------|---------------------------------------------------------------|-------------------------------------------------------------------------------|
| Empirical formula                                                      | C <sub>10</sub> H <sub>6</sub> B <sub>2</sub> Cl <sub>4</sub> | C <sub>34</sub> H <sub>6</sub> B <sub>2</sub> Cl <sub>4</sub> F <sub>16</sub> |
| <i>M<sub>r</sub></i>                                                   | 289.57                                                        | 881.81                                                                        |
| Radiation Source                                                       | MoK $\alpha$                                                  | CuK $\alpha$                                                                  |
| $\lambda$ (Å)                                                          | 0.71073                                                       | 1.54184                                                                       |
| <i>T</i> / K                                                           | 100.0(1)                                                      | 100.0(1)                                                                      |
| <i>F</i> (000)                                                         | 576                                                           | 864                                                                           |
| Crystal system                                                         | orthorhombic                                                  | triclinic                                                                     |
| Space group                                                            | <i>P</i> 2 <sub>1</sub> 2 <sub>1</sub> 2 <sub>1</sub>         | <i>P</i> $\bar{1}$                                                            |
| <i>a</i> [Å]                                                           | 7.0968(2)                                                     | 10.7395(5)                                                                    |
| <i>b</i> [Å]                                                           | 9.0337(2)                                                     | 12.2623(5)                                                                    |
| <i>c</i> [Å]                                                           | 18.3451(4)                                                    | 13.9981(5)                                                                    |
| $\alpha$ [Å]                                                           | 90                                                            | 76.888(3)                                                                     |
| $\beta$ [Å]                                                            | 90                                                            | 71.805(4)                                                                     |
| $\gamma$ [Å]                                                           | 90                                                            | 66.695(4)                                                                     |
| <i>V</i> [Å <sup>3</sup> ]                                             | 1176.11(5)                                                    | 1597.05(12)                                                                   |
| <i>Z</i>                                                               | 4                                                             | 2                                                                             |
| $\rho_{\text{calcd.}}$ [g cm <sup>-3</sup> ]                           | 1.635                                                         | 1.834                                                                         |
| $\mu$ [mm <sup>-1</sup> ]                                              | 0.967                                                         | 4.517                                                                         |
| 2 $\theta$ range [°]                                                   | 6.156 – 65.508                                                | 6.694 – 148.098                                                               |
| Index range <i>h</i>                                                   | –10 ≤ <i>h</i> ≤ 10                                           | –12 ≤ <i>h</i> ≤ 12                                                           |
| Index range <i>k</i>                                                   | –13 ≤ <i>k</i> ≤ 13                                           | –15 ≤ <i>k</i> ≤ 15                                                           |
| Index range <i>l</i>                                                   | –27 ≤ <i>l</i> ≤ 27                                           | –17 ≤ <i>l</i> ≤ 17                                                           |
| Refl. collect.                                                         | 29421                                                         | 20974                                                                         |
| Indep. refl.                                                           | 4105                                                          | 6973                                                                          |
| <i>R</i> <sub>int</sub>                                                | 0.0476                                                        | 0.0212                                                                        |
| Refl. with <i>I</i> > 2 $\sigma$ ( <i>I</i> )                          | 3741                                                          | 6303                                                                          |
| Data/restraints/ parameters                                            | 4105/0/145                                                    | 6973/0/530                                                                    |
| <i>R</i> <sub>1</sub> , <i>I</i> > 2 $\sigma$ ( <i>I</i> ) / all data  | 0.0310 / 0.0380                                               | 0.0316 / 0.0354                                                               |
| <i>wR</i> <sub>2</sub> , <i>I</i> > 2 $\sigma$ ( <i>I</i> ) / all data | 0.0650 / 0.0684                                               | 0.0872 / 0.0895                                                               |
| GoF                                                                    | 1.084                                                         | 1.060                                                                         |
| $\rho_{\text{max/min}}$ [e Å <sup>-3</sup> ]                           | 0.45/–0.32                                                    | 0.54/–0.36                                                                    |
| Flack parameter                                                        | 0.01(3)                                                       |                                                                               |
| CCDC                                                                   | 2149942                                                       | 2149943                                                                       |

## Quantum-chemical calculation of the hydride and fluoride ion affinities

The hydride and fluoride ion affinities (HIA and FIA) were determined in accordance with the method described by Krossing *et al.* with the trimethylsilyl compounds  $\text{Me}_3\text{SiY}$  ( $\text{Y} = \text{H}, \text{F}$ ) as a reference system (see equations 1 to 3).<sup>1</sup>

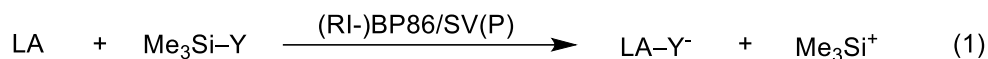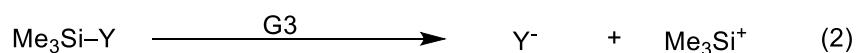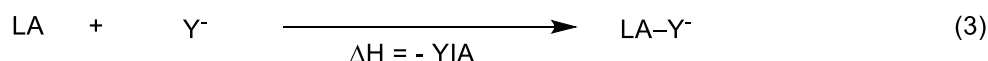

The values for the reaction enthalpy of equation 2 at the G3 level<sup>[2]</sup> of theory were taken from the publication by Krossing *et al.*<sup>[1]</sup> For the calculation of the reaction enthalpy of (1), all structures were optimized at the (RI-)BP86/SV(P) level<sup>[3-6]</sup> of theory using TURBO-MOLE 7.4.1<sup>[7, 8]</sup>. Vibrational frequencies were computed with the AOFORCE module. All structures constitute true minima and possess no imaginary frequencies. Thermal corrections to the enthalpy were obtained with the FreeH utility.

**Table S7.** Energetic data of the trimethylsilyl reference systems for the calculation of HIA and FIA values at the (RI-)BP86/SV(P) level of theory. The thermal energy correction was calculated at 298.15 K.

| compound                 | Energy [h] | Thermal correction [kJ mol <sup>-1</sup> ] | Enthalpy [kJ mol <sup>-1</sup> ] |
|--------------------------|------------|--------------------------------------------|----------------------------------|
| $\text{Me}_3\text{Si}^+$ | -408.80758 | 298.04                                     | -1073026.11                      |
| $\text{Me}_3\text{SiH}$  | -409.68911 | 322.21                                     | -1075316.40                      |
| $\text{Me}_3\text{SiF}$  | -508.92748 | 310.86                                     | -1335878.05                      |

**Table S8.** Energetic data of the Lewis acids BCF, **7**, **8** and **9** for the calculation of HIA and FIA values at the (RI-)BP86/SV(P) level of theory. The thermal energy correction was calculated at 298.15 K.

| compound                                                                                                                          | Energy [h]  | Thermal correction [kJ mol <sup>-1</sup> ] | Enthalpy [kJ mol <sup>-1</sup> ] |
|-----------------------------------------------------------------------------------------------------------------------------------|-------------|--------------------------------------------|----------------------------------|
| B(C <sub>6</sub> F <sub>5</sub> ) <sub>3</sub>                                                                                    | -2206.75257 | 471.79                                     | -5793356.29                      |
| [B(C <sub>6</sub> F <sub>5</sub> ) <sub>3</sub> H] <sup>-</sup>                                                                   | -2207.45160 | 492.16                                     | -5795171.21                      |
| [B(C <sub>6</sub> F <sub>5</sub> ) <sub>3</sub> F] <sup>-</sup>                                                                   | -2306.67691 | 477.45                                     | -6055701.96                      |
| B( <i>p</i> -ClC <sub>6</sub> F <sub>4</sub> ) <sub>3</sub> ( <b>7</b> )                                                          | -3287.79129 | 463.9                                      | -8631630.96                      |
| [B( <i>p</i> -ClC <sub>6</sub> F <sub>4</sub> ) <sub>3</sub> H] <sup>-</sup>                                                      | -3288.49297 | 485.39                                     | -8633451.70                      |
| [B( <i>p</i> -ClC <sub>6</sub> F <sub>4</sub> ) <sub>3</sub> F] <sup>-</sup>                                                      | -3387.71814 | 470.45                                     | -8893982.30                      |
| H <sub>4</sub> C <sub>6</sub> (1,2-(B( <i>p</i> -ClC <sub>6</sub> F <sub>4</sub> ) <sub>2</sub> )) <sub>2</sub> ( <b>8</b> )      | -4631.17063 | 845.84                                     | -12158290.97                     |
| [H <sub>4</sub> C <sub>6</sub> (1,2-(B( <i>p</i> -ClC <sub>6</sub> F <sub>4</sub> ) <sub>2</sub> )) <sub>2</sub> H] <sup>-</sup>  | -4631.88155 | 865.97                                     | -12160137.36                     |
| [H <sub>4</sub> C <sub>6</sub> (1,2-(B( <i>p</i> -ClC <sub>6</sub> F <sub>4</sub> ) <sub>2</sub> )) <sub>2</sub> F] <sup>-</sup>  | -4731.11609 | 852.50                                     | -12420691.10                     |
| H <sub>6</sub> C <sub>10</sub> (1,8-(B( <i>p</i> -ClC <sub>6</sub> F <sub>4</sub> ) <sub>2</sub> )) <sub>2</sub> ( <b>9</b> )     | -4784.70072 | 971.65                                     | -12561258.38                     |
| [H <sub>6</sub> C <sub>10</sub> (1,8-(B( <i>p</i> -ClC <sub>6</sub> F <sub>4</sub> ) <sub>2</sub> )) <sub>2</sub> H] <sup>-</sup> | -4785.41903 | 990.40                                     | -12563125.53                     |
| [H <sub>6</sub> C <sub>10</sub> (1,8-(B( <i>p</i> -ClC <sub>6</sub> F <sub>4</sub> ) <sub>2</sub> )) <sub>2</sub> F] <sup>-</sup> | -4884.64785 | 977.67                                     | -12823663.50                     |

### Me<sub>3</sub>Si<sup>+</sup>

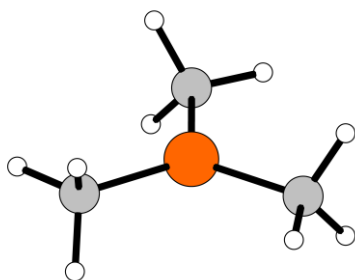

\$coord

|             |             |             |    |
|-------------|-------------|-------------|----|
| -0.01598879 | 0.35642374  | 3.47211775  | c  |
| -0.00006054 | -0.00320928 | 0.00033046  | si |
| -3.01425465 | -0.24200945 | -1.74340125 | c  |
| 3.02998111  | -0.11852705 | -1.72851689 | c  |
| -1.94711356 | 0.41558220  | 4.29039308  | h  |
| 1.06152160  | -1.23001159 | 4.35604169  | h  |
| 1.01968252  | 2.11578011  | 4.01121693  | h  |
| 3.10402863  | 1.45531797  | -3.13517903 | h  |
| 4.70608313  | 0.00683900  | -0.47255206 | h  |
| 3.14031226  | -1.89715374 | -2.86022998 | h  |
| -2.75789636 | -0.47161165 | -3.81303555 | h  |
| -4.14195626 | -1.86472402 | -0.99943856 | h  |
| -4.18433909 | 1.47730377  | -1.37774658 | h  |

\$vibrational spectrum

| #     | mode | symmetry | wave number | IR intensity | selection |
|-------|------|----------|-------------|--------------|-----------|
| rules |      |          |             |              |           |
| #     |      |          | cm**(-1)    | km/mol       | IR        |
| RAMAN |      |          |             |              |           |
| 1     |      |          | 0.00        | 0.00000      | - -       |
| 2     |      |          | 0.00        | 0.00000      | - -       |
| 3     |      |          | 0.00        | 0.00000      | - -       |
| 4     |      |          | 0.00        | 0.00000      | - -       |
| 5     |      |          | 0.00        | 0.00000      | - -       |
| 6     |      |          | 0.00        | 0.00000      | - -       |
| 7     |      | a        | 34.92       | 0.00390      | YES YES   |
| 8     |      | a        | 38.77       | 0.00748      | YES YES   |
| 9     |      | a        | 69.65       | 2.68803      | YES YES   |
| 10    |      | a        | 210.84      | 2.11984      | YES YES   |
| 11    |      | a        | 211.26      | 2.12402      | YES YES   |
| 12    |      | a        | 216.51      | 1.29151      | YES YES   |
| 13    |      | a        | 590.98      | 0.00071      | YES YES   |
| 14    |      | a        | 621.97      | 0.00139      | YES YES   |
| 15    |      | a        | 622.40      | 0.00029      | YES YES   |
| 16    |      | a        | 696.12      | 0.00122      | YES YES   |
| 17    |      | a        | 741.26      | 8.27319      | YES YES   |
| 18    |      | a        | 741.53      | 8.39950      | YES YES   |
| 19    |      | a        | 817.30      | 83.84071     | YES YES   |
| 20    |      | a        | 882.25      | 132.97233    | YES YES   |
| 21    |      | a        | 882.41      | 132.68856    | YES YES   |
| 22    |      | a        | 1240.76     | 77.09208     | YES YES   |
| 23    |      | a        | 1240.83     | 76.99746     | YES YES   |
| 24    |      | a        | 1246.99     | 0.01968      | YES YES   |
| 25    |      | a        | 1360.39     | 10.84691     | YES YES   |
| 26    |      | a        | 1360.86     | 11.45068     | YES YES   |
| 27    |      | a        | 1362.38     | 0.49814      | YES YES   |
| 28    |      | a        | 1362.55     | 1.02709      | YES YES   |
| 29    |      | a        | 1369.00     | 40.08693     | YES YES   |
| 30    |      | a        | 1369.97     | 7.23469      | YES YES   |
| 31    |      | a        | 2924.84     | 45.99198     | YES YES   |
| 32    |      | a        | 2925.03     | 46.02473     | YES YES   |
| 33    |      | a        | 2930.03     | 0.03931      | YES YES   |
| 34    |      | a        | 2999.70     | 43.42089     | YES YES   |
| 35    |      | a        | 3000.03     | 0.32329      | YES YES   |
| 36    |      | a        | 3000.13     | 0.78238      | YES YES   |
| 37    |      | a        | 3066.49     | 14.30970     | YES YES   |
| 38    |      | a        | 3066.79     | 10.63487     | YES YES   |
| 39    |      | a        | 3067.60     | 3.85126      | YES YES   |

# Me<sub>3</sub>SiH

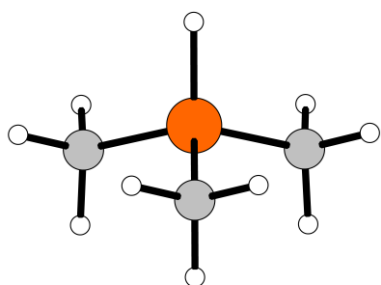

\$coord

|             |             |             |    |
|-------------|-------------|-------------|----|
| -0.43289284 | 0.74985251  | -0.30652084 | si |
| -0.46743284 | 0.81055102  | 3.28366083  | c  |
| 2.94053539  | 0.81006155  | -1.53518914 | c  |
| -2.17231799 | -2.14127259 | -1.53607812 | c  |
| -1.78303406 | 3.08765329  | -1.26117247 | h  |
| -2.43591477 | 0.82449498  | 4.02525615  | h  |
| 0.50577022  | -0.87463312 | 4.08512752  | h  |
| 0.50321412  | 2.52303943  | 4.02576026  | h  |
| 2.98516853  | 0.82289804  | -3.63838703 | h  |
| 3.96278191  | 2.52311690  | -0.86725028 | h  |
| 4.02052483  | -0.87458096 | -0.88319450 | h  |
| -2.20912585 | -2.16872827 | -3.63902630 | h  |
| -1.25175857 | -3.91969306 | -0.88840338 | h  |
| -4.16551808 | -2.17275972 | -0.86458270 | h  |

\$vibrational spectrum

| #     | mode | symmetry | wave number | IR intensity | selection |
|-------|------|----------|-------------|--------------|-----------|
| rules |      |          | cm** (-1)   | km/mol       | IR        |
| #     |      |          |             |              |           |
| RAMAN |      |          |             |              |           |
| 1     |      |          | -0.00       | 0.00000      | - -       |
| 2     |      |          | -0.00       | 0.00000      | - -       |
| 3     |      |          | 0.00        | 0.00000      | - -       |
| 4     |      |          | 0.00        | 0.00000      | - -       |
| 5     |      |          | 0.00        | 0.00000      | - -       |
| 6     |      |          | 0.00        | 0.00000      | - -       |
| 7     |      | a        | 150.25      | 0.00011      | YES YES   |
| 8     |      | a        | 163.99      | 0.00005      | YES YES   |
| 9     |      | a        | 165.62      | 0.00011      | YES YES   |
| 10    |      | a        | 197.14      | 0.56696      | YES YES   |
| 11    |      | a        | 198.37      | 0.57505      | YES YES   |
| 12    |      | a        | 231.57      | 0.85546      | YES YES   |
| 13    |      | a        | 595.00      | 1.45625      | YES YES   |
| 14    |      | a        | 602.53      | 7.03374      | YES YES   |
| 15    |      | a        | 603.54      | 7.07047      | YES YES   |
| 16    |      | a        | 667.22      | 0.00080      | YES YES   |
| 17    |      | a        | 684.26      | 11.45414     | YES YES   |
| 18    |      | a        | 684.68      | 11.67875     | YES YES   |
| 19    |      | a        | 833.20      | 17.40009     | YES YES   |
| 20    |      | a        | 833.63      | 16.61847     | YES YES   |
| 21    |      | a        | 856.68      | 70.29361     | YES YES   |
| 22    |      | a        | 889.56      | 162.87427    | YES YES   |

|    |   |         |           |     |     |
|----|---|---------|-----------|-----|-----|
| 23 | a | 889.83  | 162.25261 | YES | YES |
| 24 | a | 1239.30 | 29.86095  | YES | YES |
| 25 | a | 1239.92 | 29.82629  | YES | YES |
| 26 | a | 1250.95 | 5.44550   | YES | YES |
| 27 | a | 1395.49 | 0.00118   | YES | YES |
| 28 | a | 1399.59 | 0.30250   | YES | YES |
| 29 | a | 1399.86 | 0.28297   | YES | YES |
| 30 | a | 1409.12 | 4.94364   | YES | YES |
| 31 | a | 1409.62 | 4.96243   | YES | YES |
| 32 | a | 1416.45 | 13.82765  | YES | YES |
| 33 | a | 2134.73 | 162.41460 | YES | YES |
| 34 | a | 2937.47 | 8.30321   | YES | YES |
| 35 | a | 2937.75 | 8.13007   | YES | YES |
| 36 | a | 2938.64 | 2.89349   | YES | YES |
| 37 | a | 3027.26 | 0.80470   | YES | YES |
| 38 | a | 3027.33 | 0.54760   | YES | YES |
| 39 | a | 3028.67 | 22.12874  | YES | YES |
| 40 | a | 3031.62 | 2.84826   | YES | YES |
| 41 | a | 3031.97 | 11.97371  | YES | YES |
| 42 | a | 3032.86 | 9.76990   | YES | YES |



# Me<sub>3</sub>SiF

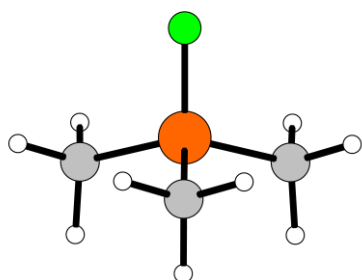

## \$coord

|             |             |             |    |
|-------------|-------------|-------------|----|
| -0.38785791 | 0.67107402  | -0.27321083 | si |
| -0.45819380 | 0.79561098  | 3.28746785  | c  |
| 2.94466435  | 0.79678252  | -1.52955236 | c  |
| -2.16143525 | -2.15298323 | -1.53044534 | c  |
| -1.86910470 | 3.22673216  | -1.31068490 | f  |
| -2.43411055 | 0.82698995  | 4.00721024  | h  |
| 0.50216578  | -0.87854569 | 4.12668136  | h  |
| 0.51162995  | 2.51741171  | 4.00766275  | h  |
| 2.96693772  | 0.81486711  | -3.63263799 | h  |
| 3.94525425  | 2.52297114  | -0.86414260 | h  |
| 4.05745956  | -0.87281493 | -0.89347374 | h  |
| -2.18975096 | -2.15793568 | -3.63330675 | h  |
| -1.27172656 | -3.95253890 | -0.89793029 | h  |
| -4.15593189 | -2.15762116 | -0.86363740 | h  |

## \$vibrational spectrum

| # mode | symmetry | wave number | IR intensity | selection |
|--------|----------|-------------|--------------|-----------|
| rules  |          | cm**(-1)    | km/mol       | IR        |
| #      |          |             |              |           |
| RAMAN  |          |             |              |           |
| 1      |          | -0.00       | 0.00000      | - -       |
| 2      |          | 0.00        | 0.00000      | - -       |
| 3      |          | 0.00        | 0.00000      | - -       |
| 4      |          | 0.00        | 0.00000      | - -       |
| 5      |          | 0.00        | 0.00000      | - -       |
| 6      |          | 0.00        | 0.00000      | - -       |
| 7      | a        | 131.33      | 0.00018      | YES YES   |
| 8      | a        | 151.66      | 0.00585      | YES YES   |
| 9      | a        | 153.77      | 0.00588      | YES YES   |
| 10     | a        | 184.22      | 0.13284      | YES YES   |
| 11     | a        | 185.57      | 0.10982      | YES YES   |
| 12     | a        | 225.30      | 0.09574      | YES YES   |
| 13     | a        | 259.34      | 12.17224     | YES YES   |
| 14     | a        | 263.20      | 12.08916     | YES YES   |
| 15     | a        | 585.80      | 0.02291      | YES YES   |
| 16     | a        | 664.84      | 0.00422      | YES YES   |
| 17     | a        | 672.51      | 3.43153      | YES YES   |
| 18     | a        | 673.46      | 3.50531      | YES YES   |
| 19     | a        | 751.14      | 29.98934     | YES YES   |
| 20     | a        | 751.92      | 29.30489     | YES YES   |
| 21     | a        | 769.96      | 3.56902      | YES YES   |
| 22     | a        | 850.81      | 137.46093    | YES YES   |
| 23     | a        | 851.37      | 136.74569    | YES YES   |

|    |   |         |           |     |     |
|----|---|---------|-----------|-----|-----|
| 24 | a | 908.76  | 169.08206 | YES | YES |
| 25 | a | 1246.37 | 45.44224  | YES | YES |
| 26 | a | 1247.12 | 45.18588  | YES | YES |
| 27 | a | 1255.05 | 15.54954  | YES | YES |
| 28 | a | 1390.48 | 0.00230   | YES | YES |
| 29 | a | 1397.21 | 0.07948   | YES | YES |
| 30 | a | 1397.62 | 0.07283   | YES | YES |
| 31 | a | 1404.07 | 4.82472   | YES | YES |
| 32 | a | 1404.61 | 4.82130   | YES | YES |
| 33 | a | 1415.34 | 15.93749  | YES | YES |
| 34 | a | 2940.21 | 3.46406   | YES | YES |
| 35 | a | 2940.63 | 3.48339   | YES | YES |
| 36 | a | 2942.69 | 1.33022   | YES | YES |
| 37 | a | 3029.54 | 1.06073   | YES | YES |
| 38 | a | 3030.09 | 0.80230   | YES | YES |
| 39 | a | 3032.25 | 16.44630  | YES | YES |
| 40 | a | 3036.44 | 1.39755   | YES | YES |
| 41 | a | 3036.93 | 8.78219   | YES | YES |
| 42 | a | 3037.81 | 7.36781   | YES | YES |

# B(C<sub>6</sub>F<sub>5</sub>)<sub>3</sub>

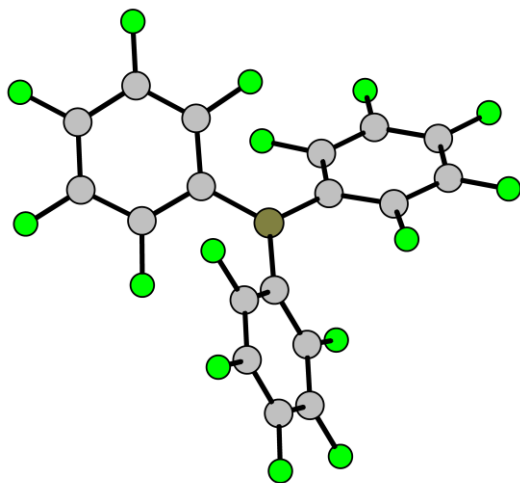

\$coord

|             |             |             |   |
|-------------|-------------|-------------|---|
| 0.00231502  | -0.00180129 | 0.11931496  | b |
| 0.00541573  | -0.00526280 | 3.08599747  | c |
| 2.55266219  | -0.07626625 | -1.41627937 | c |
| -2.55099332 | 0.08057864  | -1.41228774 | c |
| -1.91142163 | 1.19356354  | 4.51844142  | c |
| -1.91565978 | 1.24806273  | 7.16876445  | c |
| -0.00864904 | -0.04640205 | 8.49312533  | c |
| 1.94643079  | -1.25790699 | 7.16021250  | c |
| 1.90281889  | -1.24399824 | 4.50995181  | c |
| 2.79032688  | -1.53011224 | -3.64341254 | c |
| 5.01188463  | -1.60017968 | -5.08793171 | c |
| 7.06551111  | -0.07361335 | -4.36947866 | c |
| 6.92723387  | 1.38873928  | -2.15261106 | c |
| 4.68419248  | 1.37994424  | -0.73901978 | c |
| -2.80283336 | 1.57680561  | -3.60891252 | c |
| -5.02074770 | 1.64559565  | -5.05913667 | c |
| -7.07369713 | 0.11435621  | -4.34840226 | c |
| -6.91645527 | -1.39922483 | -2.16737827 | c |
| -4.67575164 | -1.39143894 | -0.74998472 | c |
| -3.78352361 | 2.45122332  | 3.36222428  | f |
| -3.74319273 | 2.43845850  | 8.43730061  | f |
| -0.01281387 | -0.06189161 | 11.00783488 | f |
| 3.76784256  | -2.46616239 | 8.42060435  | f |
| 3.77336699  | -2.49497790 | 3.34407783  | f |
| 0.87613523  | -3.00962197 | -4.41438496 | f |
| 5.16555323  | -3.02963897 | -7.16258135 | f |
| 9.16948919  | -0.06710285 | -5.74915431 | f |
| 8.89244362  | 2.81820427  | -1.46957864 | f |
| 4.61527560  | 2.85767872  | 1.32344947  | f |
| -0.89488455 | 3.07533428  | -4.35925863 | f |
| -5.18597281 | 3.10834165  | -7.10970606 | f |
| -9.18141469 | 0.12136418  | -5.72274337 | f |
| -8.87620260 | -2.84333181 | -1.49959276 | f |
| -4.59468430 | -2.89931667 | 1.29053602  | f |

\$vibrational spectrum

| #     | mode | symmetry | wave number | IR intensity | selection |     |
|-------|------|----------|-------------|--------------|-----------|-----|
| rules |      |          | cm**(-1)    | km/mol       | IR        |     |
| #     |      |          |             |              |           |     |
| RAMAN |      |          |             |              |           |     |
| 1     |      |          | -0.00       | 0.00000      | -         | -   |
| 2     |      |          | 0.00        | 0.00000      | -         | -   |
| 3     |      |          | 0.00        | 0.00000      | -         | -   |
| 4     |      |          | 0.00        | 0.00000      | -         | -   |
| 5     |      |          | 0.00        | 0.00000      | -         | -   |
| 6     |      |          | 0.00        | 0.00000      | -         | -   |
| 7     |      | a        | 19.81       | 0.43543      | YES       | YES |
| 8     |      | a        | 23.08       | 0.49879      | YES       | YES |
| 9     |      | a        | 32.88       | 0.00450      | YES       | YES |
| 10    |      | a        | 34.67       | 0.02070      | YES       | YES |
| 11    |      | a        | 36.97       | 0.00373      | YES       | YES |
| 12    |      | a        | 38.67       | 0.00060      | YES       | YES |
| 13    |      | a        | 99.93       | 0.14526      | YES       | YES |
| 14    |      | a        | 105.13      | 0.12266      | YES       | YES |
| 15    |      | a        | 108.01      | 0.03380      | YES       | YES |
| 16    |      | a        | 126.39      | 0.37123      | YES       | YES |
| 17    |      | a        | 126.91      | 0.41644      | YES       | YES |
| 18    |      | a        | 127.87      | 0.05944      | YES       | YES |
| 19    |      | a        | 138.77      | 0.02632      | YES       | YES |
| 20    |      | a        | 144.98      | 0.00688      | YES       | YES |
| 21    |      | a        | 150.67      | 0.06515      | YES       | YES |
| 22    |      | a        | 154.83      | 0.00153      | YES       | YES |
| 23    |      | a        | 155.88      | 0.20548      | YES       | YES |
| 24    |      | a        | 158.43      | 0.16762      | YES       | YES |
| 25    |      | a        | 221.65      | 3.44190      | YES       | YES |
| 26    |      | a        | 227.79      | 3.79144      | YES       | YES |
| 27    |      | a        | 232.29      | 3.67940      | YES       | YES |
| 28    |      | a        | 263.85      | 0.09973      | YES       | YES |
| 29    |      | a        | 264.17      | 0.15157      | YES       | YES |
| 30    |      | a        | 264.30      | 0.24567      | YES       | YES |
| 31    |      | a        | 269.68      | 0.12280      | YES       | YES |
| 32    |      | a        | 270.21      | 0.06737      | YES       | YES |
| 33    |      | a        | 273.30      | 0.12200      | YES       | YES |
| 34    |      | a        | 306.86      | 0.11939      | YES       | YES |
| 35    |      | a        | 307.28      | 1.01961      | YES       | YES |
| 36    |      | a        | 310.56      | 0.57883      | YES       | YES |
| 37    |      | a        | 339.87      | 2.67515      | YES       | YES |
| 38    |      | a        | 341.01      | 2.55821      | YES       | YES |
| 39    |      | a        | 347.24      | 0.12492      | YES       | YES |
| 40    |      | a        | 350.18      | 0.11865      | YES       | YES |
| 41    |      | a        | 377.47      | 6.02926      | YES       | YES |
| 42    |      | a        | 382.92      | 6.58010      | YES       | YES |
| 43    |      | a        | 391.75      | 1.20881      | YES       | YES |
| 44    |      | a        | 394.31      | 1.04611      | YES       | YES |
| 45    |      | a        | 394.95      | 0.64130      | YES       | YES |
| 46    |      | a        | 429.85      | 0.48669      | YES       | YES |
| 47    |      | a        | 430.87      | 0.25152      | YES       | YES |
| 48    |      | a        | 431.21      | 0.30182      | YES       | YES |
| 49    |      | a        | 458.58      | 4.77439      | YES       | YES |
| 50    |      | a        | 460.14      | 4.07864      | YES       | YES |
| 51    |      | a        | 483.88      | 0.00422      | YES       | YES |
| 52    |      | a        | 509.87      | 0.39310      | YES       | YES |
| 53    |      | a        | 520.45      | 0.56085      | YES       | YES |

|     |   |         |           |     |     |
|-----|---|---------|-----------|-----|-----|
| 54  | a | 531.13  | 0.48382   | YES | YES |
| 55  | a | 539.31  | 2.06038   | YES | YES |
| 56  | a | 563.84  | 3.16444   | YES | YES |
| 57  | a | 564.28  | 2.61247   | YES | YES |
| 58  | a | 566.92  | 0.02328   | YES | YES |
| 59  | a | 617.99  | 29.48504  | YES | YES |
| 60  | a | 620.03  | 28.68733  | YES | YES |
| 61  | a | 634.31  | 1.49556   | YES | YES |
| 62  | a | 635.28  | 2.32619   | YES | YES |
| 63  | a | 637.20  | 0.01725   | YES | YES |
| 64  | a | 662.95  | 20.51843  | YES | YES |
| 65  | a | 668.87  | 23.99648  | YES | YES |
| 66  | a | 678.13  | 7.83049   | YES | YES |
| 67  | a | 768.87  | 23.30457  | YES | YES |
| 68  | a | 771.65  | 22.05836  | YES | YES |
| 69  | a | 774.53  | 4.10823   | YES | YES |
| 70  | a | 852.05  | 0.11936   | YES | YES |
| 71  | a | 984.09  | 129.92797 | YES | YES |
| 72  | a | 984.70  | 57.31547  | YES | YES |
| 73  | a | 985.27  | 109.69115 | YES | YES |
| 74  | a | 1021.48 | 129.75029 | YES | YES |
| 75  | a | 1022.64 | 98.76312  | YES | YES |
| 76  | a | 1117.54 | 0.76600   | YES | YES |
| 77  | a | 1154.57 | 7.29301   | YES | YES |
| 78  | a | 1156.41 | 19.42212  | YES | YES |
| 79  | a | 1159.05 | 24.87645  | YES | YES |
| 80  | a | 1175.32 | 191.66038 | YES | YES |
| 81  | a | 1184.51 | 236.46695 | YES | YES |
| 82  | a | 1305.68 | 0.17552   | YES | YES |
| 83  | a | 1316.79 | 149.15878 | YES | YES |
| 84  | a | 1320.63 | 200.27599 | YES | YES |
| 85  | a | 1345.85 | 0.11818   | YES | YES |
| 86  | a | 1349.20 | 9.11800   | YES | YES |
| 87  | a | 1350.00 | 6.31452   | YES | YES |
| 88  | a | 1377.86 | 322.69083 | YES | YES |
| 89  | a | 1381.11 | 238.18609 | YES | YES |
| 90  | a | 1397.24 | 2.55371   | YES | YES |
| 91  | a | 1471.70 | 460.22521 | YES | YES |
| 92  | a | 1480.74 | 524.71900 | YES | YES |
| 93  | a | 1482.76 | 686.45408 | YES | YES |
| 94  | a | 1521.11 | 231.20988 | YES | YES |
| 95  | a | 1521.61 | 291.31071 | YES | YES |
| 96  | a | 1523.81 | 4.72503   | YES | YES |
| 97  | a | 1609.02 | 20.60939  | YES | YES |
| 98  | a | 1611.43 | 11.83677  | YES | YES |
| 99  | a | 1611.75 | 5.30532   | YES | YES |
| 100 | a | 1630.83 | 202.49489 | YES | YES |
| 101 | a | 1631.82 | 175.40840 | YES | YES |
| 102 | a | 1633.24 | 21.86498  | YES | YES |

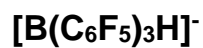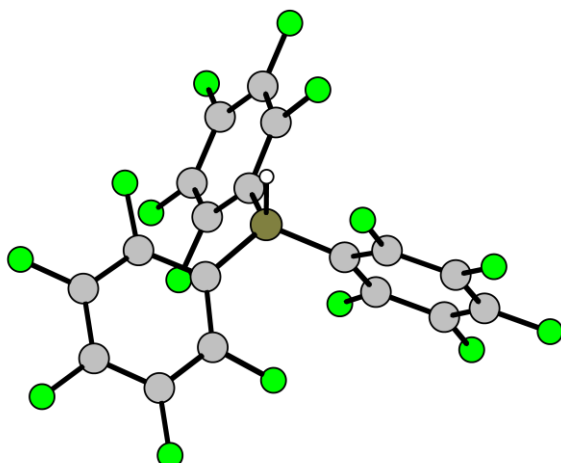

\$coord

|             |             |             |   |
|-------------|-------------|-------------|---|
| -0.51640772 | 1.14134035  | -0.45554441 | b |
| -0.61728508 | 1.15946140  | 2.65158449  | c |
| 2.37006925  | 1.22456423  | -1.59484775 | c |
| -2.32303170 | -1.08758453 | -1.64374317 | c |
| -2.71114665 | 2.22861850  | 3.89449987  | c |
| -2.93540830 | 2.38739759  | 6.53841076  | c |
| -0.98787620 | 1.43060765  | 8.06286625  | c |
| 1.13735536  | 0.33469373  | 6.91706948  | c |
| 1.26937809  | 0.21358224  | 4.26392720  | c |
| 3.46572908  | -0.53137044 | -3.25845799 | c |
| 5.88883463  | -0.24469213 | -4.32161941 | c |
| 7.34870222  | 1.87245525  | -3.68857799 | c |
| 6.35329307  | 3.67396991  | -2.01439344 | c |
| 3.92133678  | 3.30849664  | -1.01705085 | c |
| -3.80517655 | -0.62298420 | -3.80124535 | c |
| -5.47338899 | -2.40585268 | -4.85226577 | c |
| -5.70015320 | -4.79453286 | -3.72500803 | c |
| -4.24380038 | -5.36296752 | -1.58344665 | c |
| -2.59450044 | -3.51934815 | -0.61156874 | c |
| -4.66288543 | 3.17848672  | 2.55022362  | f |
| -4.98448051 | 3.44354932  | 7.62678257  | f |
| -1.15909874 | 1.56011413  | 10.60033696 | f |
| 3.00858817  | -0.59861569 | 8.37474769  | f |
| 3.36047285  | -0.89527558 | 3.30517405  | f |
| 2.21111739  | -2.64910685 | -3.95199515 | f |
| 6.82929311  | -1.98558717 | -5.92738233 | f |
| 9.67318659  | 2.18125326  | -4.68137169 | f |
| 7.74171617  | 5.71772261  | -1.39104753 | f |
| 3.07520175  | 5.11974358  | 0.57318263  | f |
| -3.67699244 | 1.62098190  | -5.00844470 | f |
| -6.85659546 | -1.85245220 | -6.92009523 | f |
| -7.29396948 | -6.52773029 | -4.69299458 | f |
| -4.43739144 | -7.66417907 | -0.50629313 | f |
| -1.20627497 | -4.22356036 | 1.41415467  | f |
| -1.46841084 | 3.16880070  | -1.12556635 | h |

\$vibrational spectrum

| # mode | symmetry | wave number | IR intensity | selection |
|--------|----------|-------------|--------------|-----------|
| rules  |          | cm**(-1)    | km/mol       | IR        |
| #      |          |             |              |           |
| RAMAN  |          |             |              |           |
| 1      |          | -0.00       | 0.00000      | - -       |
| 2      |          | -0.00       | 0.00000      | - -       |
| 3      |          | 0.00        | 0.00000      | - -       |
| 4      |          | 0.00        | 0.00000      | - -       |
| 5      |          | 0.00        | 0.00000      | - -       |
| 6      |          | 0.00        | 0.00000      | - -       |
| 7      | a        | 8.09        | 0.01106      | YES YES   |
| 8      | a        | 16.68       | 0.00514      | YES YES   |
| 9      | a        | 21.29       | 0.01246      | YES YES   |
| 10     | a        | 29.26       | 0.02286      | YES YES   |
| 11     | a        | 33.50       | 0.02049      | YES YES   |
| 12     | a        | 40.83       | 0.09646      | YES YES   |
| 13     | a        | 95.92       | 0.14742      | YES YES   |
| 14     | a        | 100.09      | 0.19719      | YES YES   |
| 15     | a        | 107.44      | 0.11855      | YES YES   |
| 16     | a        | 123.48      | 0.00373      | YES YES   |
| 17     | a        | 124.88      | 0.00738      | YES YES   |
| 18     | a        | 126.25      | 0.00093      | YES YES   |
| 19     | a        | 135.66      | 0.01596      | YES YES   |
| 20     | a        | 141.57      | 0.07225      | YES YES   |
| 21     | a        | 144.33      | 0.03697      | YES YES   |
| 22     | a        | 157.85      | 0.01588      | YES YES   |
| 23     | a        | 161.62      | 0.05387      | YES YES   |
| 24     | a        | 162.62      | 0.02991      | YES YES   |
| 25     | a        | 218.97      | 1.31169      | YES YES   |
| 26     | a        | 222.04      | 1.26525      | YES YES   |
| 27     | a        | 227.45      | 1.83289      | YES YES   |
| 28     | a        | 260.74      | 0.03969      | YES YES   |
| 29     | a        | 263.26      | 0.03433      | YES YES   |
| 30     | a        | 264.08      | 0.03670      | YES YES   |
| 31     | a        | 269.16      | 0.04979      | YES YES   |
| 32     | a        | 271.10      | 0.04602      | YES YES   |
| 33     | a        | 272.78      | 0.03470      | YES YES   |
| 34     | a        | 303.72      | 0.49433      | YES YES   |
| 35     | a        | 306.04      | 0.72401      | YES YES   |
| 36     | a        | 307.05      | 0.35399      | YES YES   |
| 37     | a        | 336.11      | 1.55889      | YES YES   |
| 38     | a        | 338.17      | 1.00342      | YES YES   |
| 39     | a        | 338.32      | 1.46476      | YES YES   |
| 40     | a        | 349.25      | 0.07508      | YES YES   |
| 41     | a        | 362.71      | 0.60589      | YES YES   |
| 42     | a        | 374.71      | 0.15396      | YES YES   |
| 43     | a        | 386.63      | 0.06671      | YES YES   |
| 44     | a        | 388.45      | 0.04985      | YES YES   |
| 45     | a        | 390.17      | 0.16986      | YES YES   |
| 46     | a        | 432.55      | 0.00596      | YES YES   |
| 47     | a        | 432.90      | 0.06762      | YES YES   |
| 48     | a        | 433.30      | 0.15275      | YES YES   |
| 49     | a        | 453.80      | 1.70173      | YES YES   |
| 50     | a        | 454.89      | 1.97709      | YES YES   |
| 51     | a        | 470.59      | 0.01651      | YES YES   |
| 52     | a        | 494.13      | 0.03100      | YES YES   |

|     |   |         |           |     |     |
|-----|---|---------|-----------|-----|-----|
| 53  | a | 502.80  | 0.01324   | YES | YES |
| 54  | a | 511.91  | 0.07734   | YES | YES |
| 55  | a | 527.43  | 0.53041   | YES | YES |
| 56  | a | 558.59  | 5.13858   | YES | YES |
| 57  | a | 559.34  | 4.81285   | YES | YES |
| 58  | a | 562.92  | 0.07214   | YES | YES |
| 59  | a | 585.22  | 10.07920  | YES | YES |
| 60  | a | 590.87  | 13.35415  | YES | YES |
| 61  | a | 626.62  | 0.09565   | YES | YES |
| 62  | a | 628.18  | 0.57441   | YES | YES |
| 63  | a | 632.22  | 0.09510   | YES | YES |
| 64  | a | 654.84  | 31.81158  | YES | YES |
| 65  | a | 662.26  | 4.86458   | YES | YES |
| 66  | a | 680.54  | 31.17133  | YES | YES |
| 67  | a | 744.42  | 12.19290  | YES | YES |
| 68  | a | 753.40  | 14.47375  | YES | YES |
| 69  | a | 769.59  | 1.26126   | YES | YES |
| 70  | a | 827.37  | 1.83420   | YES | YES |
| 71  | a | 894.04  | 73.20260  | YES | YES |
| 72  | a | 902.29  | 75.59096  | YES | YES |
| 73  | a | 964.53  | 109.29939 | YES | YES |
| 74  | a | 971.47  | 188.46427 | YES | YES |
| 75  | a | 976.64  | 253.74077 | YES | YES |
| 76  | a | 1028.07 | 18.38777  | YES | YES |
| 77  | a | 1046.62 | 32.37182  | YES | YES |
| 78  | a | 1080.46 | 11.79194  | YES | YES |
| 79  | a | 1096.36 | 215.82812 | YES | YES |
| 80  | a | 1102.41 | 239.75345 | YES | YES |
| 81  | a | 1126.32 | 3.75638   | YES | YES |
| 82  | a | 1128.56 | 0.97336   | YES | YES |
| 83  | a | 1130.21 | 5.17888   | YES | YES |
| 84  | a | 1261.45 | 26.43230  | YES | YES |
| 85  | a | 1262.72 | 15.51136  | YES | YES |
| 86  | a | 1264.11 | 31.39452  | YES | YES |
| 87  | a | 1349.24 | 7.51389   | YES | YES |
| 88  | a | 1350.72 | 12.66727  | YES | YES |
| 89  | a | 1351.37 | 4.36198   | YES | YES |
| 90  | a | 1372.95 | 12.56955  | YES | YES |
| 91  | a | 1376.23 | 5.29092   | YES | YES |
| 92  | a | 1379.59 | 2.05402   | YES | YES |
| 93  | a | 1460.55 | 347.75580 | YES | YES |
| 94  | a | 1463.59 | 279.30832 | YES | YES |
| 95  | a | 1466.12 | 498.34580 | YES | YES |
| 96  | a | 1502.39 | 240.93092 | YES | YES |
| 97  | a | 1504.91 | 295.11533 | YES | YES |
| 98  | a | 1508.32 | 28.99978  | YES | YES |
| 99  | a | 1613.62 | 6.61667   | YES | YES |
| 100 | a | 1615.85 | 2.36564   | YES | YES |
| 101 | a | 1616.23 | 6.38167   | YES | YES |
| 102 | a | 1619.26 | 29.14311  | YES | YES |
| 103 | a | 1621.75 | 26.94898  | YES | YES |
| 104 | a | 1623.98 | 8.66739   | YES | YES |
| 105 | a | 2399.37 | 74.56385  | YES | YES |



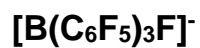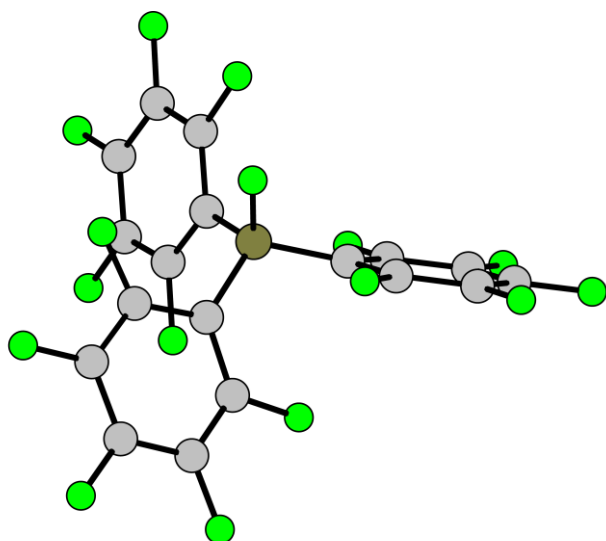

\$coord

|             |             |             |   |
|-------------|-------------|-------------|---|
| -0.52842030 | 1.30122129  | -0.49136425 | b |
| -0.61028658 | 1.17826889  | 2.66095963  | c |
| 2.41015344  | 1.23920495  | -1.61691985 | c |
| -2.35735506 | -0.96678029 | -1.68400847 | c |
| -2.83270607 | 1.93955629  | 3.90427083  | c |
| -3.07474269 | 2.06030512  | 6.54962095  | c |
| -1.02129791 | 1.35494060  | 8.07120941  | c |
| 1.22470278  | 0.54461435  | 6.92081153  | c |
| 1.37081482  | 0.45205394  | 4.26732821  | c |
| 3.44504181  | -0.55102094 | -3.27507378 | c |
| 5.88230907  | -0.34347380 | -4.32818616 | c |
| 7.39561494  | 1.73723648  | -3.70130968 | c |
| 6.45518877  | 3.57024089  | -2.02987835 | c |
| 4.01451988  | 3.27759431  | -1.02953353 | c |
| -3.82506899 | -0.57171241 | -3.86624927 | c |
| -5.49822839 | -2.38972718 | -4.85362807 | c |
| -5.72257186 | -4.74534813 | -3.66222167 | c |
| -4.25952562 | -5.25098501 | -1.51028165 | c |
| -2.61686486 | -3.37373608 | -0.59420161 | c |
| -4.90295887 | 2.59172584  | 2.56941133  | f |
| -5.24982043 | 2.81892624  | 7.63880170  | f |
| -1.20518388 | 1.45191977  | 10.60763826 | f |
| 3.20331597  | -0.14778950 | 8.36822450  | f |
| 3.58401595  | -0.40989179 | 3.32528284  | f |
| 2.12866031  | -2.62691714 | -3.97682576 | f |
| 6.77476946  | -2.11027218 | -5.93184353 | f |
| 9.72675806  | 1.97902658  | -4.69133588 | f |
| 7.90817369  | 5.56516851  | -1.40154271 | f |
| 3.25295335  | 5.08356986  | 0.60046916  | f |
| -3.68596799 | 1.60171389  | -5.18387165 | f |
| -6.87238723 | -1.89970465 | -6.94241665 | f |
| -7.31410258 | -6.50567446 | -4.58050647 | f |
| -4.44034301 | -7.52078470 | -0.36745005 | f |
| -1.21846271 | -4.03101329 | 1.44381634  | f |
| -1.54069726 | 3.69754374  | -1.20919568 | f |

\$vibrational spectrum

| #     | mode | symmetry | wave number | IR intensity | selection |
|-------|------|----------|-------------|--------------|-----------|
| rules |      |          |             |              |           |
| #     |      |          | cm**(-1)    | km/mol       | IR        |
| RAMAN |      |          |             |              |           |
| 1     |      |          | -0.00       | 0.00000      | - -       |
| 2     |      |          | -0.00       | 0.00000      | - -       |
| 3     |      |          | 0.00        | 0.00000      | - -       |
| 4     |      |          | 0.00        | 0.00000      | - -       |
| 5     |      |          | 0.00        | 0.00000      | - -       |
| 6     |      |          | 0.00        | 0.00000      | - -       |
| 7     |      | a        | 2.66        | 0.01207      | YES YES   |
| 8     |      | a        | 20.44       | 0.01154      | YES YES   |
| 9     |      | a        | 25.86       | 0.00625      | YES YES   |
| 10    |      | a        | 30.79       | 0.02175      | YES YES   |
| 11    |      | a        | 34.38       | 0.02510      | YES YES   |
| 12    |      | a        | 39.23       | 0.08212      | YES YES   |
| 13    |      | a        | 95.82       | 0.42328      | YES YES   |
| 14    |      | a        | 101.00      | 0.12780      | YES YES   |
| 15    |      | a        | 105.43      | 0.21410      | YES YES   |
| 16    |      | a        | 122.24      | 0.00158      | YES YES   |
| 17    |      | a        | 124.18      | 0.01349      | YES YES   |
| 18    |      | a        | 127.76      | 0.00623      | YES YES   |
| 19    |      | a        | 135.40      | 0.07885      | YES YES   |
| 20    |      | a        | 142.15      | 0.17843      | YES YES   |
| 21    |      | a        | 147.64      | 0.19343      | YES YES   |
| 22    |      | a        | 157.38      | 0.01751      | YES YES   |
| 23    |      | a        | 159.87      | 0.15833      | YES YES   |
| 24    |      | a        | 162.29      | 0.07494      | YES YES   |
| 25    |      | a        | 205.02      | 2.84452      | YES YES   |
| 26    |      | a        | 218.54      | 1.96041      | YES YES   |
| 27    |      | a        | 223.79      | 2.09217      | YES YES   |
| 28    |      | a        | 245.53      | 0.71470      | YES YES   |
| 29    |      | a        | 248.04      | 0.74060      | YES YES   |
| 30    |      | a        | 260.39      | 0.07378      | YES YES   |
| 31    |      | a        | 261.94      | 0.06459      | YES YES   |
| 32    |      | a        | 264.18      | 0.05087      | YES YES   |
| 33    |      | a        | 271.17      | 0.09904      | YES YES   |
| 34    |      | a        | 271.99      | 0.11558      | YES YES   |
| 35    |      | a        | 272.28      | 0.03879      | YES YES   |
| 36    |      | a        | 306.96      | 0.54619      | YES YES   |
| 37    |      | a        | 307.71      | 0.27432      | YES YES   |
| 38    |      | a        | 309.30      | 0.21158      | YES YES   |
| 39    |      | a        | 311.99      | 0.91269      | YES YES   |
| 40    |      | a        | 342.20      | 3.69458      | YES YES   |
| 41    |      | a        | 344.12      | 2.15040      | YES YES   |
| 42    |      | a        | 346.59      | 0.10971      | YES YES   |
| 43    |      | a        | 380.25      | 1.15561      | YES YES   |
| 44    |      | a        | 386.44      | 0.11351      | YES YES   |
| 45    |      | a        | 386.94      | 0.05115      | YES YES   |
| 46    |      | a        | 389.36      | 0.09350      | YES YES   |
| 47    |      | a        | 392.24      | 1.57243      | YES YES   |
| 48    |      | a        | 429.26      | 0.29102      | YES YES   |
| 49    |      | a        | 433.34      | 0.09539      | YES YES   |
| 50    |      | a        | 433.58      | 0.20530      | YES YES   |
| 51    |      | a        | 434.63      | 0.18012      | YES YES   |
| 52    |      | a        | 465.08      | 2.14947      | YES YES   |

|     |   |         |           |     |     |
|-----|---|---------|-----------|-----|-----|
| 53  | a | 465.87  | 1.74679   | YES | YES |
| 54  | a | 481.98  | 0.02117   | YES | YES |
| 55  | a | 499.44  | 0.08862   | YES | YES |
| 56  | a | 503.80  | 0.02143   | YES | YES |
| 57  | a | 513.88  | 0.02608   | YES | YES |
| 58  | a | 561.22  | 4.74219   | YES | YES |
| 59  | a | 561.78  | 3.49480   | YES | YES |
| 60  | a | 563.44  | 0.11261   | YES | YES |
| 61  | a | 598.19  | 35.17487  | YES | YES |
| 62  | a | 609.21  | 37.71911  | YES | YES |
| 63  | a | 630.20  | 0.31636   | YES | YES |
| 64  | a | 631.25  | 0.06738   | YES | YES |
| 65  | a | 633.85  | 0.01338   | YES | YES |
| 66  | a | 641.05  | 2.47794   | YES | YES |
| 67  | a | 688.73  | 65.92389  | YES | YES |
| 68  | a | 703.41  | 79.99524  | YES | YES |
| 69  | a | 745.91  | 3.41737   | YES | YES |
| 70  | a | 754.70  | 33.66348  | YES | YES |
| 71  | a | 758.85  | 35.53605  | YES | YES |
| 72  | a | 807.79  | 4.97571   | YES | YES |
| 73  | a | 911.76  | 10.29684  | YES | YES |
| 74  | a | 925.09  | 12.24811  | YES | YES |
| 75  | a | 968.76  | 316.88879 | YES | YES |
| 76  | a | 974.95  | 88.01769  | YES | YES |
| 77  | a | 980.32  | 146.54154 | YES | YES |
| 78  | a | 1009.26 | 1.16919   | YES | YES |
| 79  | a | 1084.40 | 51.81680  | YES | YES |
| 80  | a | 1088.62 | 281.22419 | YES | YES |
| 81  | a | 1091.88 | 360.90557 | YES | YES |
| 82  | a | 1128.11 | 0.77865   | YES | YES |
| 83  | a | 1131.01 | 0.97943   | YES | YES |
| 84  | a | 1131.74 | 1.48555   | YES | YES |
| 85  | a | 1263.12 | 54.66614  | YES | YES |
| 86  | a | 1264.12 | 63.11077  | YES | YES |
| 87  | a | 1265.24 | 8.66653   | YES | YES |
| 88  | a | 1348.51 | 7.96405   | YES | YES |
| 89  | a | 1349.72 | 5.09193   | YES | YES |
| 90  | a | 1350.32 | 5.70157   | YES | YES |
| 91  | a | 1370.36 | 25.06454  | YES | YES |
| 92  | a | 1373.39 | 18.69906  | YES | YES |
| 93  | a | 1381.53 | 0.55668   | YES | YES |
| 94  | a | 1458.95 | 318.65713 | YES | YES |
| 95  | a | 1463.51 | 486.92679 | YES | YES |
| 96  | a | 1465.58 | 553.54742 | YES | YES |
| 97  | a | 1506.14 | 185.96609 | YES | YES |
| 98  | a | 1507.38 | 237.30169 | YES | YES |
| 99  | a | 1510.35 | 13.50381  | YES | YES |
| 100 | a | 1615.50 | 13.53291  | YES | YES |
| 101 | a | 1616.41 | 6.61420   | YES | YES |
| 102 | a | 1618.83 | 2.24477   | YES | YES |
| 103 | a | 1622.18 | 53.96660  | YES | YES |
| 104 | a | 1623.49 | 51.86137  | YES | YES |
| 105 | a | 1625.25 | 9.16425   | YES | YES |

**B(*p*-ClC<sub>6</sub>F<sub>4</sub>)<sub>3</sub> (7)**

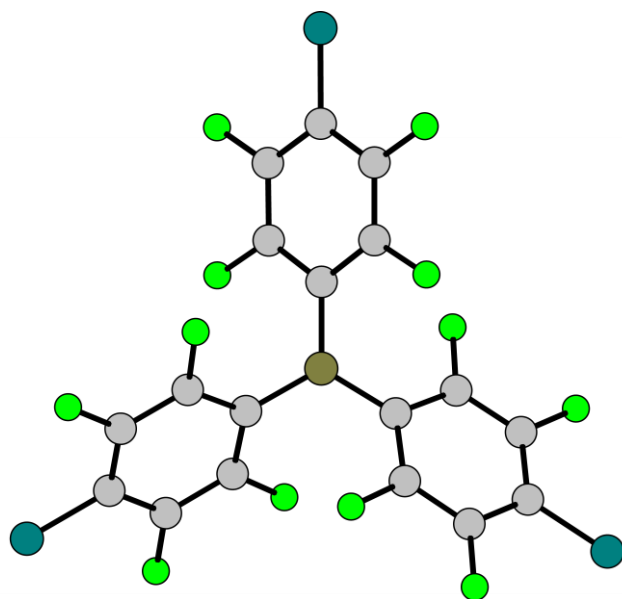

\$coord

|             |             |             |    |
|-------------|-------------|-------------|----|
| 0.04086065  | -0.05282568 | 0.06472121  | b  |
| -0.00692943 | 0.17995335  | 3.02713537  | c  |
| 2.61184096  | -0.25476585 | -1.41384133 | c  |
| -2.51873237 | -0.04551379 | -1.45791542 | c  |
| -1.72712037 | 1.79676356  | 4.27451961  | c  |
| -1.80476708 | 2.05509541  | 6.91208282  | c  |
| 1.64402209  | -1.20411831 | 4.60361915  | c  |
| 1.58798241  | -1.03068802 | 7.24875962  | c  |
| -0.14223220 | 0.62179119  | 8.41927484  | c  |
| 4.79141567  | 1.11232110  | -0.69559837 | c  |
| 7.04943680  | 1.05129949  | -2.08594481 | c  |
| 2.85498037  | -1.75743658 | -3.60956325 | c  |
| 5.09329027  | -1.89618422 | -5.02189216 | c  |
| 7.21108703  | -0.47004723 | -4.26551546 | c  |
| -2.80001343 | 1.33120774  | -3.72578457 | c  |
| -5.05442560 | 1.36220812  | -5.11966112 | c  |
| -4.65843028 | -1.42109451 | -0.65323825 | c  |
| -6.92881479 | -1.47461286 | -2.02406004 | c  |
| -7.13850602 | -0.06354666 | -4.27282786 | c  |
| -0.22056508 | 0.88775790  | 11.66633764 | cl |
| 9.97283153  | -0.58246450 | -5.99050780 | cl |
| -9.92008861 | -0.08232265 | -5.97188978 | cl |
| -3.33632062 | 3.22709069  | 2.92978554  | f  |
| -3.44417508 | 3.64827104  | 7.97585363  | f  |
| 3.16146393  | -2.42323230 | 8.64215381  | f  |
| 3.31794003  | -2.81912215 | 3.58779376  | f  |
| 4.74160013  | 2.61515760  | 1.34811757  | f  |
| 9.02647537  | 2.43155725  | -1.34924002 | f  |
| 5.20542097  | -3.36501546 | -7.06756919 | f  |
| 0.90688832  | -3.17725010 | -4.40437583 | f  |
| -0.87698475 | 2.73982279  | -4.60516622 | f  |
| -5.21428980 | 2.73211258  | -7.23067119 | f  |
| -8.87180973 | -2.85602875 | -1.20104555 | f  |
| -4.55333129 | -2.81614018 | 1.46615363  | f  |

\$vibrational spectrum

| # mode | symmetry | wave number | IR intensity | selection |
|--------|----------|-------------|--------------|-----------|
| rules  |          | cm**(-1)    | km/mol       | IR        |
| #      |          |             |              |           |
| RAMAN  |          |             |              |           |
| 1      |          | -0.00       | 0.00000      | - -       |
| 2      |          | -0.00       | 0.00000      | - -       |
| 3      |          | -0.00       | 0.00000      | - -       |
| 4      |          | 0.00        | 0.00000      | - -       |
| 5      |          | 0.00        | 0.00000      | - -       |
| 6      |          | 0.00        | 0.00000      | - -       |
| 7      | a        | 15.38       | 0.51359      | YES YES   |
| 8      | a        | 18.82       | 0.53414      | YES YES   |
| 9      | a        | 26.17       | 0.01735      | YES YES   |
| 10     | a        | 27.45       | 0.00262      | YES YES   |
| 11     | a        | 28.49       | 0.01003      | YES YES   |
| 12     | a        | 32.91       | 0.00491      | YES YES   |
| 13     | a        | 88.38       | 0.08826      | YES YES   |
| 14     | a        | 89.26       | 0.08049      | YES YES   |
| 15     | a        | 91.11       | 0.04500      | YES YES   |
| 16     | a        | 122.66      | 0.30868      | YES YES   |
| 17     | a        | 123.23      | 0.41006      | YES YES   |
| 18     | a        | 124.28      | 0.06864      | YES YES   |
| 19     | a        | 129.99      | 0.12723      | YES YES   |
| 20     | a        | 131.18      | 0.22486      | YES YES   |
| 21     | a        | 132.11      | 0.33402      | YES YES   |
| 22     | a        | 143.19      | 0.08763      | YES YES   |
| 23     | a        | 144.54      | 0.12210      | YES YES   |
| 24     | a        | 144.80      | 0.03242      | YES YES   |
| 25     | a        | 193.93      | 0.10405      | YES YES   |
| 26     | a        | 195.22      | 0.09751      | YES YES   |
| 27     | a        | 195.75      | 0.09915      | YES YES   |
| 28     | a        | 214.69      | 2.30904      | YES YES   |
| 29     | a        | 218.48      | 2.97257      | YES YES   |
| 30     | a        | 220.13      | 2.93094      | YES YES   |
| 31     | a        | 274.90      | 0.31146      | YES YES   |
| 32     | a        | 276.79      | 0.41757      | YES YES   |
| 33     | a        | 279.64      | 0.04500      | YES YES   |
| 34     | a        | 299.91      | 0.23390      | YES YES   |
| 35     | a        | 302.21      | 0.27157      | YES YES   |
| 36     | a        | 303.37      | 0.22782      | YES YES   |
| 37     | a        | 319.90      | 0.39005      | YES YES   |
| 38     | a        | 321.79      | 0.32704      | YES YES   |
| 39     | a        | 323.22      | 0.13808      | YES YES   |
| 40     | a        | 333.61      | 0.31100      | YES YES   |
| 41     | a        | 358.93      | 11.01052     | YES YES   |
| 42     | a        | 362.10      | 11.36445     | YES YES   |
| 43     | a        | 399.97      | 2.14971      | YES YES   |
| 44     | a        | 401.08      | 2.24665      | YES YES   |
| 45     | a        | 401.89      | 0.33424      | YES YES   |
| 46     | a        | 427.08      | 2.58191      | YES YES   |
| 47     | a        | 427.37      | 2.30116      | YES YES   |
| 48     | a        | 427.82      | 0.96089      | YES YES   |
| 49     | a        | 434.40      | 3.48964      | YES YES   |
| 50     | a        | 434.72      | 3.29088      | YES YES   |
| 51     | a        | 471.25      | 0.00275      | YES YES   |
| 52     | a        | 504.29      | 1.00291      | YES YES   |

|     |   |         |           |     |     |
|-----|---|---------|-----------|-----|-----|
| 53  | a | 504.33  | 0.99896   | YES | YES |
| 54  | a | 504.57  | 0.01673   | YES | YES |
| 55  | a | 515.96  | 0.15089   | YES | YES |
| 56  | a | 576.89  | 2.32979   | YES | YES |
| 57  | a | 578.31  | 2.26481   | YES | YES |
| 58  | a | 588.09  | 1.91247   | YES | YES |
| 59  | a | 623.65  | 32.69245  | YES | YES |
| 60  | a | 624.95  | 35.37291  | YES | YES |
| 61  | a | 641.47  | 1.96608   | YES | YES |
| 62  | a | 641.99  | 2.01255   | YES | YES |
| 63  | a | 643.97  | 0.09482   | YES | YES |
| 64  | a | 665.20  | 19.16353  | YES | YES |
| 65  | a | 668.20  | 18.41578  | YES | YES |
| 66  | a | 673.91  | 7.59983   | YES | YES |
| 67  | a | 750.27  | 38.18802  | YES | YES |
| 68  | a | 751.69  | 38.23409  | YES | YES |
| 69  | a | 759.43  | 5.21196   | YES | YES |
| 70  | a | 808.33  | 0.08469   | YES | YES |
| 71  | a | 879.89  | 59.35730  | YES | YES |
| 72  | a | 881.07  | 64.31863  | YES | YES |
| 73  | a | 962.66  | 0.03704   | YES | YES |
| 74  | a | 970.42  | 157.61535 | YES | YES |
| 75  | a | 974.30  | 111.97010 | YES | YES |
| 76  | a | 976.11  | 126.79542 | YES | YES |
| 77  | a | 1101.77 | 79.65974  | YES | YES |
| 78  | a | 1107.22 | 92.84431  | YES | YES |
| 79  | a | 1152.81 | 2.25534   | YES | YES |
| 80  | a | 1156.08 | 0.54855   | YES | YES |
| 81  | a | 1157.65 | 0.15156   | YES | YES |
| 82  | a | 1265.86 | 0.25778   | YES | YES |
| 83  | a | 1291.62 | 149.57963 | YES | YES |
| 84  | a | 1295.41 | 167.12279 | YES | YES |
| 85  | a | 1341.52 | 0.87535   | YES | YES |
| 86  | a | 1343.81 | 2.26560   | YES | YES |
| 87  | a | 1344.79 | 1.32777   | YES | YES |
| 88  | a | 1378.05 | 356.16353 | YES | YES |
| 89  | a | 1379.33 | 341.32410 | YES | YES |
| 90  | a | 1394.37 | 0.27828   | YES | YES |
| 91  | a | 1445.59 | 144.51615 | YES | YES |
| 92  | a | 1446.87 | 132.60972 | YES | YES |
| 93  | a | 1448.24 | 44.95439  | YES | YES |
| 94  | a | 1468.36 | 545.96070 | YES | YES |
| 95  | a | 1474.63 | 485.10590 | YES | YES |
| 96  | a | 1476.27 | 540.72702 | YES | YES |
| 97  | a | 1582.93 | 32.68167  | YES | YES |
| 98  | a | 1585.04 | 4.43294   | YES | YES |
| 99  | a | 1585.37 | 5.71762   | YES | YES |
| 100 | a | 1618.50 | 183.07226 | YES | YES |
| 101 | a | 1618.94 | 196.95235 | YES | YES |
| 102 | a | 1619.72 | 13.90899  | YES | YES |

**[B(*p*-ClC<sub>6</sub>F<sub>4</sub>)<sub>3</sub>H]<sup>-</sup>**

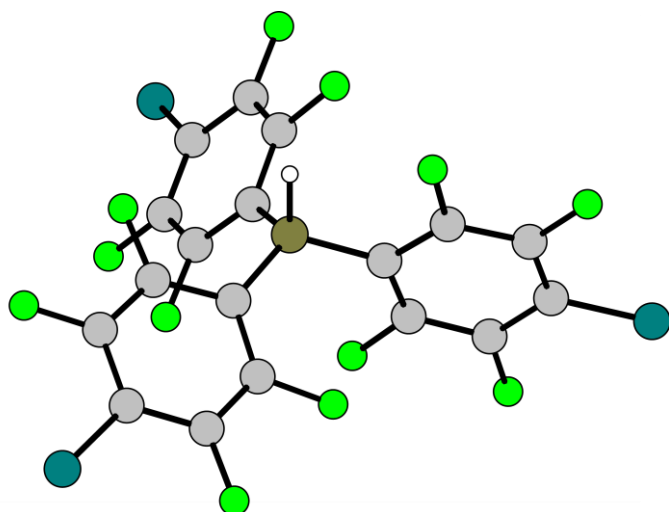

\$coord

|              |             |             |    |
|--------------|-------------|-------------|----|
| 0.59252608   | -1.31425870 | 0.17781101  | b  |
| -2.19275975  | -1.38702151 | -1.21255845 | c  |
| 0.25225596   | -0.08978584 | 3.01148914  | c  |
| 2.84517279   | -0.08512011 | -1.56191110 | c  |
| -2.98415322  | 0.11929469  | -3.25095574 | c  |
| -5.37880715  | -0.08221732 | -4.38991799 | c  |
| -7.13791125  | -1.83454149 | -3.45049878 | c  |
| -6.44431656  | -3.36185568 | -1.39037204 | c  |
| -4.02320687  | -3.10413511 | -0.32945548 | c  |
| 3.35650514   | -1.15943323 | -3.94381616 | c  |
| 5.29883698   | -0.35374995 | -5.55905817 | c  |
| 6.87924739   | 1.64508965  | -4.80357648 | c  |
| 6.46026556   | 2.77081135  | -2.43833360 | c  |
| 4.48455900   | 1.89227978  | -0.88620617 | c  |
| -0.89248880  | 2.26921424  | 3.43045423  | c  |
| -1.32773780  | 3.29500883  | 5.83943036  | c  |
| -0.61048626  | 1.90865974  | 7.99079340  | c  |
| 0.54110651   | -0.46132910 | 7.66603661  | c  |
| 0.95556917   | -1.40075382 | 5.21122570  | c  |
| -1.42940338  | 1.88260769  | -4.24859792 | f  |
| -5.98869644  | 1.40764963  | -6.35764167 | f  |
| -10.12103213 | -2.11253264 | -4.81233425 | cl |
| -8.08805373  | -5.05523104 | -0.44336830 | f  |
| -3.49392170  | -4.63358221 | 1.64453379  | f  |
| 1.91700038   | -3.09296997 | -4.79308407 | f  |
| 5.64628154   | -1.47838060 | -7.81292108 | f  |
| 9.30793668   | 2.69596019  | -6.76000518 | cl |
| 7.93633926   | 4.68844301  | -1.65616642 | f  |
| 4.24893133   | 3.09312151  | 1.35938988  | f  |
| -1.60636177  | 3.70110541  | 1.43978945  | f  |
| -2.41582437  | 5.57841929  | 6.09452018  | f  |
| -1.13119039  | 3.11695225  | 11.00728611 | cl |
| 1.24231213   | -1.82761013 | 9.69321986  | f  |
| 2.09119733   | -3.67901266 | 5.07027398  | f  |
| 1.21030832   | -3.55109615 | 0.46452537  | h  |

\$vibrational spectrum

| # mode | symmetry | wave number | IR intensity | selection |
|--------|----------|-------------|--------------|-----------|
| rules  |          |             |              |           |
| #      |          | cm**(-1)    | km/mol       | IR        |
| RAMAN  |          |             |              |           |
| 1      |          | -0.00       | 0.00000      | - -       |
| 2      |          | -0.00       | 0.00000      | - -       |
| 3      |          | 0.00        | 0.00000      | - -       |
| 4      |          | 0.00        | 0.00000      | - -       |
| 5      |          | 0.00        | 0.00000      | - -       |
| 6      |          | 0.00        | 0.00000      | - -       |
| 7      | a        | 11.97       | 0.00656      | YES YES   |
| 8      | a        | 20.70       | 0.04637      | YES YES   |
| 9      | a        | 23.62       | 0.02727      | YES YES   |
| 10     | a        | 26.52       | 0.01346      | YES YES   |
| 11     | a        | 33.80       | 0.05255      | YES YES   |
| 12     | a        | 34.64       | 0.10990      | YES YES   |
| 13     | a        | 83.47       | 0.13406      | YES YES   |
| 14     | a        | 89.13       | 0.04109      | YES YES   |
| 15     | a        | 93.99       | 0.05755      | YES YES   |
| 16     | a        | 121.39      | 0.01425      | YES YES   |
| 17     | a        | 122.70      | 0.00573      | YES YES   |
| 18     | a        | 126.55      | 0.00957      | YES YES   |
| 19     | a        | 128.62      | 0.01991      | YES YES   |
| 20     | a        | 133.49      | 0.09335      | YES YES   |
| 21     | a        | 137.52      | 0.08808      | YES YES   |
| 22     | a        | 140.27      | 0.05055      | YES YES   |
| 23     | a        | 144.94      | 0.07788      | YES YES   |
| 24     | a        | 149.41      | 0.07812      | YES YES   |
| 25     | a        | 191.56      | 0.00758      | YES YES   |
| 26     | a        | 192.23      | 0.04920      | YES YES   |
| 27     | a        | 192.35      | 0.00631      | YES YES   |
| 28     | a        | 210.01      | 1.00110      | YES YES   |
| 29     | a        | 214.07      | 0.67681      | YES YES   |
| 30     | a        | 222.35      | 1.01922      | YES YES   |
| 31     | a        | 275.68      | 0.00812      | YES YES   |
| 32     | a        | 276.97      | 0.02334      | YES YES   |
| 33     | a        | 279.01      | 0.03682      | YES YES   |
| 34     | a        | 301.21      | 0.31012      | YES YES   |
| 35     | a        | 302.83      | 0.29368      | YES YES   |
| 36     | a        | 305.31      | 0.11067      | YES YES   |
| 37     | a        | 318.69      | 0.28335      | YES YES   |
| 38     | a        | 322.18      | 0.73586      | YES YES   |
| 39     | a        | 322.48      | 0.52540      | YES YES   |
| 40     | a        | 328.31      | 0.90798      | YES YES   |
| 41     | a        | 340.31      | 1.39296      | YES YES   |
| 42     | a        | 357.13      | 1.01574      | YES YES   |
| 43     | a        | 395.19      | 0.27254      | YES YES   |
| 44     | a        | 398.17      | 0.22863      | YES YES   |
| 45     | a        | 399.41      | 0.06911      | YES YES   |
| 46     | a        | 423.72      | 5.09976      | YES YES   |
| 47     | a        | 426.01      | 2.78632      | YES YES   |
| 48     | a        | 430.22      | 0.00552      | YES YES   |
| 49     | a        | 432.40      | 0.19214      | YES YES   |
| 50     | a        | 433.80      | 0.36575      | YES YES   |
| 51     | a        | 452.09      | 0.01327      | YES YES   |
| 52     | a        | 498.80      | 2.63490      | YES YES   |



|     |   |         |           |     |     |
|-----|---|---------|-----------|-----|-----|
| 53  | a | 499.99  | 2.49861   | YES | YES |
| 54  | a | 501.22  | 2.12529   | YES | YES |
| 55  | a | 520.57  | 0.39659   | YES | YES |
| 56  | a | 555.94  | 0.09027   | YES | YES |
| 57  | a | 561.49  | 0.34634   | YES | YES |
| 58  | a | 563.72  | 0.97316   | YES | YES |
| 59  | a | 594.85  | 16.37641  | YES | YES |
| 60  | a | 597.49  | 15.92244  | YES | YES |
| 61  | a | 632.67  | 0.63094   | YES | YES |
| 62  | a | 635.52  | 0.49987   | YES | YES |
| 63  | a | 640.75  | 0.69682   | YES | YES |
| 64  | a | 650.04  | 27.19471  | YES | YES |
| 65  | a | 663.53  | 2.89754   | YES | YES |
| 66  | a | 691.12  | 30.21287  | YES | YES |
| 67  | a | 726.97  | 28.09819  | YES | YES |
| 68  | a | 737.85  | 24.71658  | YES | YES |
| 69  | a | 752.42  | 3.53437   | YES | YES |
| 70  | a | 795.57  | 4.68217   | YES | YES |
| 71  | a | 831.53  | 93.64571  | YES | YES |
| 72  | a | 841.14  | 128.88291 | YES | YES |
| 73  | a | 930.12  | 13.74674  | YES | YES |
| 74  | a | 937.28  | 26.54087  | YES | YES |
| 75  | a | 941.81  | 89.12743  | YES | YES |
| 76  | a | 962.92  | 224.08934 | YES | YES |
| 77  | a | 972.25  | 104.94357 | YES | YES |
| 78  | a | 979.08  | 42.10444  | YES | YES |
| 79  | a | 1046.86 | 36.28984  | YES | YES |
| 80  | a | 1073.20 | 61.18475  | YES | YES |
| 81  | a | 1126.37 | 1.09316   | YES | YES |
| 82  | a | 1130.71 | 0.27005   | YES | YES |
| 83  | a | 1133.59 | 1.73701   | YES | YES |
| 84  | a | 1230.43 | 18.97051  | YES | YES |
| 85  | a | 1231.87 | 58.72219  | YES | YES |
| 86  | a | 1237.90 | 73.99867  | YES | YES |
| 87  | a | 1347.45 | 7.88003   | YES | YES |
| 88  | a | 1349.51 | 0.54384   | YES | YES |
| 89  | a | 1350.78 | 2.10664   | YES | YES |
| 90  | a | 1370.95 | 7.08984   | YES | YES |
| 91  | a | 1374.77 | 0.90945   | YES | YES |
| 92  | a | 1379.22 | 3.72511   | YES | YES |
| 93  | a | 1443.36 | 96.99818  | YES | YES |
| 94  | a | 1444.25 | 103.72095 | YES | YES |
| 95  | a | 1445.58 | 30.58044  | YES | YES |
| 96  | a | 1453.11 | 255.75860 | YES | YES |
| 97  | a | 1460.00 | 310.27099 | YES | YES |
| 98  | a | 1462.78 | 627.74490 | YES | YES |
| 99  | a | 1589.62 | 8.99721   | YES | YES |
| 100 | a | 1592.53 | 11.55273  | YES | YES |
| 101 | a | 1593.42 | 2.04943   | YES | YES |
| 102 | a | 1601.64 | 2.37615   | YES | YES |
| 103 | a | 1603.54 | 2.29928   | YES | YES |
| 104 | a | 1606.18 | 2.38379   | YES | YES |
| 105 | a | 2404.03 | 79.00934  | YES | YES |

**[B(*p*-ClC<sub>6</sub>F<sub>4</sub>)<sub>3</sub>F]<sup>-</sup>**

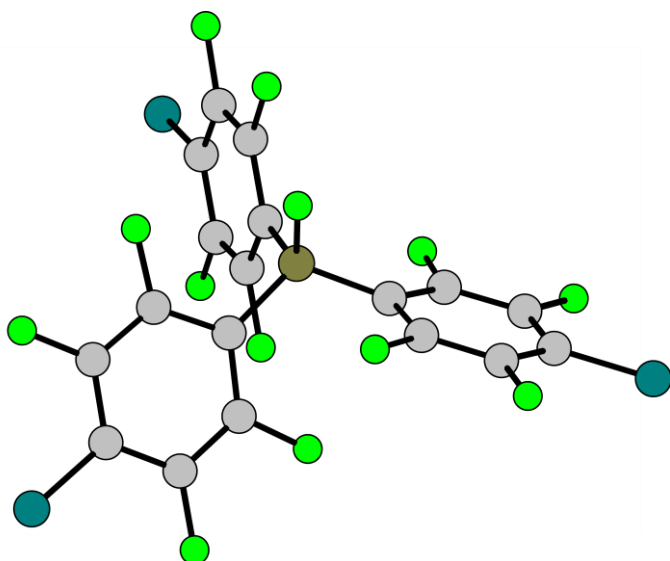

\$coord

|              |             |             |    |
|--------------|-------------|-------------|----|
| 0.64509261   | -1.46107967 | 0.14061481  | b  |
| -2.21438911  | -1.44857080 | -1.20505232 | c  |
| 0.29219025   | -0.18975906 | 2.99679844  | c  |
| 2.85621987   | -0.06059981 | -1.60651100 | c  |
| -3.02732427  | 0.06451590  | -3.22527303 | c  |
| -5.44381156  | -0.11715620 | -4.32018582 | c  |
| -7.19692479  | -1.85714453 | -3.34789465 | c  |
| -6.48295727  | -3.38147890 | -1.29415375 | c  |
| -4.04385568  | -3.13416279 | -0.26714266 | c  |
| 3.28585392   | -0.98066422 | -4.06424716 | c  |
| 5.24764855   | -0.14014371 | -5.63941909 | c  |
| 6.91661607   | 1.73026772  | -4.75730331 | c  |
| 6.56975247   | 2.70145991  | -2.31383432 | c  |
| 4.57208308   | 1.79392984  | -0.80468648 | c  |
| -0.84269599  | 2.19033308  | 3.31160508  | c  |
| -1.32481175  | 3.31295528  | 5.66673204  | c  |
| -0.65615246  | 2.00873560  | 7.88317701  | c  |
| 0.49476715   | -0.37206269 | 7.66536050  | c  |
| 0.95750634   | -1.41519171 | 5.25824707  | c  |
| -1.48170044  | 1.81521592  | -4.25915466 | f  |
| -6.07390548  | 1.36840121  | -6.28401034 | f  |
| -10.20125366 | -2.12080424 | -4.66217511 | cl |
| -8.12780842  | -5.04940453 | -0.30787100 | f  |
| -3.52062514  | -4.62254423 | 1.73403607  | f  |
| 1.75455186   | -2.76875958 | -5.04663492 | f  |
| 5.52976184   | -1.11059353 | -7.97098310 | f  |
| 9.37281504   | 2.81184799  | -6.65898732 | cl |
| 8.14786310   | 4.47506709  | -1.40553506 | f  |
| 4.42034990   | 2.82679467  | 1.52791808  | f  |
| -1.49755841  | 3.56163532  | 1.25427041  | f  |
| -2.40916462  | 5.60779386  | 5.80784223  | f  |
| -1.22911521  | 3.33241179  | 10.84012909 | cl |
| 1.16426547   | -1.66048043 | 9.75246946  | f  |
| 2.11081655   | -3.68279324 | 5.26045044  | f  |
| 1.43590021   | -4.02797131 | 0.34140437  | f  |

\$vibrational spectrum

| # mode rules | symmetry | wave number<br>cm**(-1) | IR intensity<br>km/mol | selection<br>IR |     |
|--------------|----------|-------------------------|------------------------|-----------------|-----|
| RAMAN        |          |                         |                        |                 |     |
| 1            |          | -0.00                   | 0.00000                | -               | -   |
| 2            |          | -0.00                   | 0.00000                | -               | -   |
| 3            |          | -0.00                   | 0.00000                | -               | -   |
| 4            |          | -0.00                   | 0.00000                | -               | -   |
| 5            |          | 0.00                    | 0.00000                | -               | -   |
| 6            |          | 0.00                    | 0.00000                | -               | -   |
| 7            | a        | 13.32                   | 0.01339                | YES             | YES |
| 8            | a        | 21.78                   | 0.05538                | YES             | YES |
| 9            | a        | 24.29                   | 0.02022                | YES             | YES |
| 10           | a        | 29.00                   | 0.00268                | YES             | YES |
| 11           | a        | 33.72                   | 0.13952                | YES             | YES |
| 12           | a        | 35.20                   | 0.03799                | YES             | YES |
| 13           | a        | 83.29                   | 0.14011                | YES             | YES |
| 14           | a        | 91.23                   | 0.11413                | YES             | YES |
| 15           | a        | 94.97                   | 0.05805                | YES             | YES |
| 16           | a        | 118.07                  | 0.08738                | YES             | YES |
| 17           | a        | 122.61                  | 0.00493                | YES             | YES |
| 18           | a        | 124.48                  | 0.09252                | YES             | YES |
| 19           | a        | 126.68                  | 0.06781                | YES             | YES |
| 20           | a        | 134.59                  | 0.06432                | YES             | YES |
| 21           | a        | 136.19                  | 0.30088                | YES             | YES |
| 22           | a        | 140.82                  | 0.11681                | YES             | YES |
| 23           | a        | 144.63                  | 0.05520                | YES             | YES |
| 24           | a        | 150.68                  | 0.05594                | YES             | YES |
| 25           | a        | 190.52                  | 0.34888                | YES             | YES |
| 26           | a        | 191.77                  | 0.02074                | YES             | YES |
| 27           | a        | 192.87                  | 0.06376                | YES             | YES |
| 28           | a        | 198.79                  | 2.20283                | YES             | YES |
| 29           | a        | 210.99                  | 1.17772                | YES             | YES |
| 30           | a        | 219.36                  | 1.37229                | YES             | YES |
| 31           | a        | 233.60                  | 0.54513                | YES             | YES |
| 32           | a        | 241.77                  | 1.07820                | YES             | YES |
| 33           | a        | 275.48                  | 0.06831                | YES             | YES |
| 34           | a        | 278.31                  | 0.02148                | YES             | YES |
| 35           | a        | 279.80                  | 0.05982                | YES             | YES |
| 36           | a        | 301.70                  | 0.24638                | YES             | YES |
| 37           | a        | 305.41                  | 0.10133                | YES             | YES |
| 38           | a        | 305.69                  | 0.41652                | YES             | YES |
| 39           | a        | 308.01                  | 0.18383                | YES             | YES |
| 40           | a        | 322.84                  | 0.57931                | YES             | YES |
| 41           | a        | 323.68                  | 0.30826                | YES             | YES |
| 42           | a        | 325.37                  | 1.22004                | YES             | YES |
| 43           | a        | 350.31                  | 3.29055                | YES             | YES |
| 44           | a        | 379.31                  | 3.29069                | YES             | YES |
| 45           | a        | 394.90                  | 0.08647                | YES             | YES |
| 46           | a        | 397.21                  | 0.16277                | YES             | YES |
| 47           | a        | 397.88                  | 0.27956                | YES             | YES |
| 48           | a        | 414.56                  | 0.91266                | YES             | YES |
| 49           | a        | 431.70                  | 0.26475                | YES             | YES |
| 50           | a        | 432.32                  | 0.86244                | YES             | YES |
| 51           | a        | 433.23                  | 0.08811                | YES             | YES |
| 52           | a        | 440.87                  | 6.22700                | YES             | YES |

|     |   |         |           |     |     |
|-----|---|---------|-----------|-----|-----|
| 53  | a | 443.16  | 4.54565   | YES | YES |
| 54  | a | 469.16  | 0.10226   | YES | YES |
| 55  | a | 499.99  | 3.09502   | YES | YES |
| 56  | a | 500.25  | 2.56077   | YES | YES |
| 57  | a | 500.84  | 0.64011   | YES | YES |
| 58  | a | 558.03  | 0.82982   | YES | YES |
| 59  | a | 561.33  | 0.96211   | YES | YES |
| 60  | a | 565.20  | 1.26226   | YES | YES |
| 61  | a | 603.19  | 28.69118  | YES | YES |
| 62  | a | 616.02  | 42.58203  | YES | YES |
| 63  | a | 636.67  | 0.03161   | YES | YES |
| 64  | a | 636.95  | 0.60451   | YES | YES |
| 65  | a | 640.78  | 0.43485   | YES | YES |
| 66  | a | 650.39  | 6.82235   | YES | YES |
| 67  | a | 682.78  | 59.30212  | YES | YES |
| 68  | a | 704.52  | 79.52184  | YES | YES |
| 69  | a | 729.44  | 3.51529   | YES | YES |
| 70  | a | 736.30  | 67.56076  | YES | YES |
| 71  | a | 741.64  | 57.77124  | YES | YES |
| 72  | a | 777.98  | 9.60269   | YES | YES |
| 73  | a | 846.25  | 6.65427   | YES | YES |
| 74  | a | 854.69  | 20.12134  | YES | YES |
| 75  | a | 924.07  | 0.92617   | YES | YES |
| 76  | a | 948.37  | 240.23395 | YES | YES |
| 77  | a | 955.17  | 263.00446 | YES | YES |
| 78  | a | 962.51  | 93.02573  | YES | YES |
| 79  | a | 973.65  | 47.67277  | YES | YES |
| 80  | a | 990.90  | 94.83802  | YES | YES |
| 81  | a | 1025.36 | 50.03410  | YES | YES |
| 82  | a | 1127.61 | 1.37654   | YES | YES |
| 83  | a | 1132.32 | 0.26341   | YES | YES |
| 84  | a | 1135.16 | 0.54567   | YES | YES |
| 85  | a | 1231.67 | 78.52038  | YES | YES |
| 86  | a | 1233.75 | 81.16452  | YES | YES |
| 87  | a | 1237.83 | 88.86699  | YES | YES |
| 88  | a | 1345.85 | 2.58241   | YES | YES |
| 89  | a | 1348.76 | 0.89359   | YES | YES |
| 90  | a | 1349.66 | 0.95817   | YES | YES |
| 91  | a | 1366.66 | 17.56666  | YES | YES |
| 92  | a | 1371.97 | 12.39297  | YES | YES |
| 93  | a | 1379.72 | 0.07004   | YES | YES |
| 94  | a | 1444.04 | 122.00066 | YES | YES |
| 95  | a | 1445.64 | 100.39101 | YES | YES |
| 96  | a | 1446.63 | 38.45417  | YES | YES |
| 97  | a | 1451.83 | 159.98053 | YES | YES |
| 98  | a | 1459.22 | 414.44567 | YES | YES |
| 99  | a | 1463.38 | 742.07655 | YES | YES |
| 100 | a | 1591.26 | 2.88887   | YES | YES |
| 101 | a | 1593.68 | 8.15233   | YES | YES |
| 102 | a | 1595.93 | 3.30142   | YES | YES |
| 103 | a | 1604.16 | 14.79356  | YES | YES |
| 104 | a | 1606.12 | 21.78944  | YES | YES |
| 105 | a | 1608.11 | 4.68839   | YES | YES |

# H<sub>4</sub>C<sub>6</sub>(1,2-(B(*p*-ClC<sub>6</sub>F<sub>4</sub>)<sub>2</sub>))<sub>2</sub> (8)

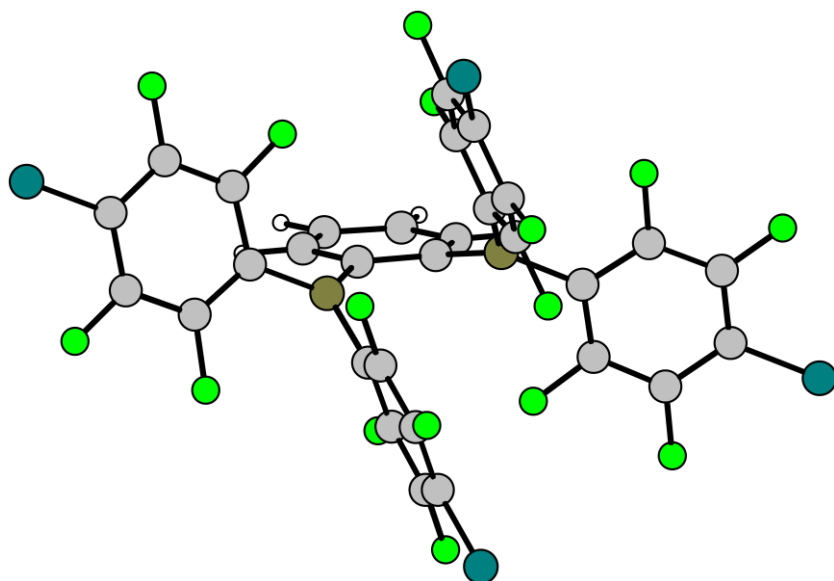

\$coord

|              |             |             |    |
|--------------|-------------|-------------|----|
| 1.29075708   | 3.34578577  | 0.42497227  | c  |
| -1.29334701  | 3.34531401  | -0.42647773 | c  |
| -2.52611307  | 5.69524481  | -0.77113454 | c  |
| -1.27122909  | 8.00491139  | -0.38279093 | c  |
| 1.26807703   | 8.00550098  | 0.37636740  | c  |
| 2.52308945   | 5.69641424  | 0.76737862  | c  |
| -4.50700630  | 5.72376399  | -1.41994391 | h  |
| -2.27939618  | 9.80319556  | -0.68569934 | h  |
| 2.27601359   | 9.80422835  | 0.67736593  | h  |
| 4.50377559   | 5.72582630  | 1.41677255  | h  |
| -2.72508871  | 0.94008383  | -1.37765866 | b  |
| 2.72236714   | 0.94194367  | 1.37834519  | b  |
| -1.29646237  | -1.10407858 | -3.02037184 | c  |
| -5.67207622  | 0.64078995  | -0.99458138 | c  |
| 1.29451605   | -1.10708777 | 3.01522385  | c  |
| 5.67054058   | 0.64614948  | 0.99983928  | c  |
| 0.31424891   | -0.41314444 | -5.03231760 | c  |
| 1.53266436   | -2.20508102 | -6.56660668 | c  |
| 1.16473439   | -4.79981524 | -6.10204665 | c  |
| -0.44169437  | -5.56219917 | -4.11848211 | c  |
| -1.65151064  | -3.71916880 | -2.65242811 | c  |
| -7.27007978  | -0.11914566 | -2.99216731 | c  |
| -9.89489993  | -0.38253764 | -2.71762799 | c  |
| -11.01681121 | 0.07495875  | -0.34686878 | c  |
| -9.48620189  | 0.81856928  | 1.70014013  | c  |
| -6.87256928  | 1.10837473  | 1.34017235  | c  |
| -14.23596749 | -0.26973099 | 0.04513059  | c1 |
| -0.31878806  | -0.42050699 | 5.02667162  | c  |
| -1.53148178  | -2.21573543 | 6.56164881  | c  |
| -1.15792751  | -4.80943647 | 6.09585027  | c  |
| 0.44968383   | -5.56739486 | 4.11151762  | c  |
| 1.65508551   | -3.72116080 | 2.64582725  | c  |
| -2.64923916  | -7.04420452 | 7.94508773  | c1 |

|              |             |             |    |
|--------------|-------------|-------------|----|
| 7.26732955   | -0.10729975 | 3.00051954  | c  |
| 9.89221631   | -0.37200082 | 2.72802164  | c  |
| 11.01518614  | 0.07836673  | 0.35640017  | c  |
| 9.48560256   | 0.81598002  | -1.69354815 | c  |
| 6.87185364   | 1.10727815  | -1.33561265 | c  |
| 14.23453620  | -0.26789864 | -0.03315538 | cl |
| 2.66205919   | -7.03048042 | -7.95140538 | cl |
| 0.64015116   | 2.03100589  | -5.61545865 | f  |
| 3.00471542   | -1.44834130 | -8.46857313 | f  |
| -0.80584511  | -8.00988611 | -3.63561269 | f  |
| -3.15960699  | -4.53029531 | -0.76609816 | f  |
| -6.30394930  | -0.54554148 | -5.30273423 | f  |
| -11.31121399 | -1.05539199 | -4.69264325 | f  |
| -10.50459736 | 1.23304258  | 3.96952726  | f  |
| -5.49802948  | 1.78684884  | 3.36228437  | f  |
| -0.64792833  | 2.02262147  | 5.61228839  | f  |
| -3.00367420  | -1.46300981 | 8.46507618  | f  |
| 0.81905480   | -8.01404102 | 3.62748868  | f  |
| 3.16483269   | -4.52809108 | 0.75911195  | f  |
| 6.29907766   | -0.52734776 | 5.31142974  | f  |
| 11.30748317  | -1.03988508 | 4.70546964  | f  |
| 10.50513870  | 1.22389481  | -3.96359056 | f  |
| 5.49794409   | 1.77984540  | -3.36029323 | f  |

\$vibrational spectrum

| #     | mode | symmetry | wave number | IR intensity | selection |     |
|-------|------|----------|-------------|--------------|-----------|-----|
| rules |      |          | cm**(-1)    | km/mol       | IR        |     |
| RAMAN |      |          |             |              |           |     |
| 1     |      |          | -0.00       | 0.00000      | -         | -   |
| 2     |      |          | -0.00       | 0.00000      | -         | -   |
| 3     |      |          | -0.00       | 0.00000      | -         | -   |
| 4     |      |          | 0.00        | 0.00000      | -         | -   |
| 5     |      |          | 0.00        | 0.00000      | -         | -   |
| 6     |      |          | 0.00        | 0.00000      | -         | -   |
| 7     |      | a        | 9.60        | 0.13215      | YES       | YES |
| 8     |      | a        | 9.81        | 0.01780      | YES       | YES |
| 9     |      | a        | 16.90       | 0.01577      | YES       | YES |
| 10    |      | a        | 20.91       | 0.22719      | YES       | YES |
| 11    |      | a        | 21.71       | 0.01613      | YES       | YES |
| 12    |      | a        | 27.17       | 0.30237      | YES       | YES |
| 13    |      | a        | 28.70       | 0.00032      | YES       | YES |
| 14    |      | a        | 35.79       | 0.11929      | YES       | YES |
| 15    |      | a        | 38.52       | 0.02206      | YES       | YES |
| 16    |      | a        | 44.17       | 0.05475      | YES       | YES |
| 17    |      | a        | 50.98       | 0.44291      | YES       | YES |
| 18    |      | a        | 51.58       | 0.12086      | YES       | YES |
| 19    |      | a        | 75.10       | 0.11966      | YES       | YES |
| 20    |      | a        | 89.49       | 0.08422      | YES       | YES |
| 21    |      | a        | 93.00       | 0.06738      | YES       | YES |
| 22    |      | a        | 95.58       | 0.40042      | YES       | YES |
| 23    |      | a        | 104.47      | 0.38920      | YES       | YES |
| 24    |      | a        | 121.74      | 0.25434      | YES       | YES |
| 25    |      | a        | 123.14      | 0.15259      | YES       | YES |
| 26    |      | a        | 124.27      | 0.02333      | YES       | YES |
| 27    |      | a        | 126.78      | 0.26055      | YES       | YES |

|    |   |        |          |     |     |
|----|---|--------|----------|-----|-----|
| 28 | a | 130.18 | 0.23126  | YES | YES |
| 29 | a | 130.30 | 0.52426  | YES | YES |
| 30 | a | 131.86 | 0.09136  | YES | YES |
| 31 | a | 132.29 | 0.00063  | YES | YES |
| 32 | a | 140.11 | 0.10420  | YES | YES |
| 33 | a | 143.59 | 0.30733  | YES | YES |
| 34 | a | 146.26 | 0.00629  | YES | YES |
| 35 | a | 149.02 | 0.12014  | YES | YES |
| 36 | a | 193.84 | 0.19117  | YES | YES |
| 37 | a | 194.68 | 0.01870  | YES | YES |
| 38 | a | 195.05 | 0.07310  | YES | YES |
| 39 | a | 195.09 | 0.06215  | YES | YES |
| 40 | a | 205.54 | 2.27636  | YES | YES |
| 41 | a | 209.90 | 1.83141  | YES | YES |
| 42 | a | 216.51 | 1.45209  | YES | YES |
| 43 | a | 217.03 | 1.62445  | YES | YES |
| 44 | a | 225.20 | 3.11497  | YES | YES |
| 45 | a | 235.70 | 0.06151  | YES | YES |
| 46 | a | 271.07 | 1.20211  | YES | YES |
| 47 | a | 275.74 | 0.02881  | YES | YES |
| 48 | a | 277.79 | 0.12513  | YES | YES |
| 49 | a | 279.12 | 0.04339  | YES | YES |
| 50 | a | 298.11 | 2.37973  | YES | YES |
| 51 | a | 299.78 | 0.11226  | YES | YES |
| 52 | a | 300.09 | 0.10446  | YES | YES |
| 53 | a | 301.82 | 0.07081  | YES | YES |
| 54 | a | 303.17 | 0.77076  | YES | YES |
| 55 | a | 318.98 | 0.17325  | YES | YES |
| 56 | a | 319.23 | 0.06925  | YES | YES |
| 57 | a | 320.73 | 0.02935  | YES | YES |
| 58 | a | 324.60 | 0.15350  | YES | YES |
| 59 | a | 341.05 | 1.62888  | YES | YES |
| 60 | a | 343.88 | 2.68709  | YES | YES |
| 61 | a | 362.10 | 4.36439  | YES | YES |
| 62 | a | 372.47 | 1.87517  | YES | YES |
| 63 | a | 400.43 | 1.25436  | YES | YES |
| 64 | a | 400.82 | 8.29341  | YES | YES |
| 65 | a | 401.75 | 0.57165  | YES | YES |
| 66 | a | 402.22 | 2.45771  | YES | YES |
| 67 | a | 404.75 | 12.15358 | YES | YES |
| 68 | a | 416.19 | 3.34641  | YES | YES |
| 69 | a | 428.74 | 0.09979  | YES | YES |
| 70 | a | 428.99 | 0.96365  | YES | YES |
| 71 | a | 430.42 | 1.26601  | YES | YES |
| 72 | a | 430.76 | 0.59393  | YES | YES |
| 73 | a | 454.53 | 3.52428  | YES | YES |
| 74 | a | 456.71 | 1.26843  | YES | YES |
| 75 | a | 458.45 | 3.42140  | YES | YES |
| 76 | a | 483.24 | 0.86284  | YES | YES |
| 77 | a | 504.93 | 0.33526  | YES | YES |
| 78 | a | 504.98 | 0.44921  | YES | YES |
| 79 | a | 505.39 | 1.21428  | YES | YES |
| 80 | a | 505.48 | 0.38540  | YES | YES |
| 81 | a | 545.72 | 8.80022  | YES | YES |
| 82 | a | 545.90 | 0.96467  | YES | YES |
| 83 | a | 569.65 | 12.14554 | YES | YES |
| 84 | a | 578.80 | 0.02253  | YES | YES |

|     |   |         |           |     |     |
|-----|---|---------|-----------|-----|-----|
| 85  | a | 592.10  | 2.30615   | YES | YES |
| 86  | a | 595.18  | 4.29768   | YES | YES |
| 87  | a | 602.52  | 23.46245  | YES | YES |
| 88  | a | 606.58  | 1.40027   | YES | YES |
| 89  | a | 639.23  | 3.86408   | YES | YES |
| 90  | a | 639.45  | 43.31315  | YES | YES |
| 91  | a | 641.64  | 10.46365  | YES | YES |
| 92  | a | 642.62  | 0.64263   | YES | YES |
| 93  | a | 643.89  | 33.92238  | YES | YES |
| 94  | a | 644.10  | 2.87790   | YES | YES |
| 95  | a | 655.95  | 0.06589   | YES | YES |
| 96  | a | 663.92  | 2.69102   | YES | YES |
| 97  | a | 697.68  | 13.86180  | YES | YES |
| 98  | a | 703.53  | 82.87240  | YES | YES |
| 99  | a | 712.52  | 10.06907  | YES | YES |
| 100 | a | 736.77  | 0.27651   | YES | YES |
| 101 | a | 737.06  | 2.39542   | YES | YES |
| 102 | a | 741.50  | 28.46211  | YES | YES |
| 103 | a | 763.17  | 2.37099   | YES | YES |
| 104 | a | 772.27  | 44.48339  | YES | YES |
| 105 | a | 778.56  | 3.75652   | YES | YES |
| 106 | a | 787.86  | 64.58670  | YES | YES |
| 107 | a | 872.94  | 4.20127   | YES | YES |
| 108 | a | 875.66  | 13.71465  | YES | YES |
| 109 | a | 878.35  | 130.12192 | YES | YES |
| 110 | a | 886.29  | 9.80453   | YES | YES |
| 111 | a | 887.49  | 2.59778   | YES | YES |
| 112 | a | 950.99  | 6.04309   | YES | YES |
| 113 | a | 967.84  | 57.68036  | YES | YES |
| 114 | a | 971.41  | 24.98668  | YES | YES |
| 115 | a | 973.91  | 100.02469 | YES | YES |
| 116 | a | 973.95  | 257.73861 | YES | YES |
| 117 | a | 987.97  | 0.92825   | YES | YES |
| 118 | a | 992.47  | 22.11713  | YES | YES |
| 119 | a | 999.27  | 1.06735   | YES | YES |
| 120 | a | 1047.99 | 0.01995   | YES | YES |
| 121 | a | 1074.46 | 49.58372  | YES | YES |
| 122 | a | 1097.42 | 28.19765  | YES | YES |
| 123 | a | 1107.11 | 150.32928 | YES | YES |
| 124 | a | 1148.57 | 0.55641   | YES | YES |
| 125 | a | 1151.97 | 2.87034   | YES | YES |
| 126 | a | 1152.22 | 0.32781   | YES | YES |
| 127 | a | 1155.10 | 1.99398   | YES | YES |
| 128 | a | 1155.54 | 2.88494   | YES | YES |
| 129 | a | 1203.98 | 45.10934  | YES | YES |
| 130 | a | 1220.05 | 83.56749  | YES | YES |
| 131 | a | 1240.82 | 11.06924  | YES | YES |
| 132 | a | 1276.58 | 106.11577 | YES | YES |
| 133 | a | 1277.26 | 100.56169 | YES | YES |
| 134 | a | 1284.82 | 24.39763  | YES | YES |
| 135 | a | 1287.49 | 332.17864 | YES | YES |
| 136 | a | 1331.41 | 5.28710   | YES | YES |
| 137 | a | 1343.65 | 0.31552   | YES | YES |
| 138 | a | 1343.83 | 0.08954   | YES | YES |
| 139 | a | 1345.10 | 1.65387   | YES | YES |
| 140 | a | 1345.82 | 0.95524   | YES | YES |
| 141 | a | 1378.46 | 33.60543  | YES | YES |



|     |   |         |            |     |     |
|-----|---|---------|------------|-----|-----|
| 142 | a | 1379.69 | 184.73058  | YES | YES |
| 143 | a | 1384.19 | 271.12592  | YES | YES |
| 144 | a | 1392.28 | 69.57500   | YES | YES |
| 145 | a | 1414.31 | 1.13728    | YES | YES |
| 146 | a | 1445.06 | 95.60816   | YES | YES |
| 147 | a | 1446.70 | 48.87809   | YES | YES |
| 148 | a | 1447.81 | 6.81830    | YES | YES |
| 149 | a | 1448.24 | 220.39697  | YES | YES |
| 150 | a | 1450.73 | 8.75452    | YES | YES |
| 151 | a | 1465.61 | 229.57763  | YES | YES |
| 152 | a | 1466.92 | 37.88614   | YES | YES |
| 153 | a | 1475.06 | 1018.97857 | YES | YES |
| 154 | a | 1475.80 | 491.04626  | YES | YES |
| 155 | a | 1560.09 | 0.01452    | YES | YES |
| 156 | a | 1581.05 | 24.61386   | YES | YES |
| 157 | a | 1584.70 | 4.86280    | YES | YES |
| 158 | a | 1585.27 | 23.39846   | YES | YES |
| 159 | a | 1586.75 | 26.48017   | YES | YES |
| 160 | a | 1586.99 | 7.38876    | YES | YES |
| 161 | a | 1617.31 | 195.87409  | YES | YES |
| 162 | a | 1617.45 | 36.53211   | YES | YES |
| 163 | a | 1619.38 | 65.19074   | YES | YES |
| 164 | a | 1620.06 | 94.80239   | YES | YES |
| 165 | a | 3086.76 | 7.70184    | YES | YES |
| 166 | a | 3091.81 | 0.00670    | YES | YES |
| 167 | a | 3103.36 | 14.69593   | YES | YES |
| 168 | a | 3115.64 | 25.06862   | YES | YES |

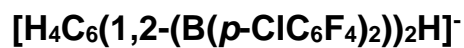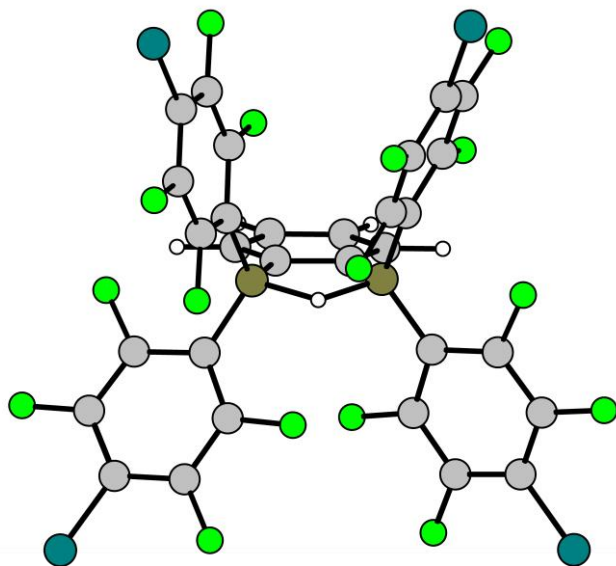

\$cooord

|             |             |             |    |
|-------------|-------------|-------------|----|
| -1.33280459 | -1.00318951 | 8.91186091  | c  |
| -0.89340448 | -2.84685819 | 7.04950995  | c  |
| 0.09899175  | -2.11126640 | 4.70096709  | c  |
| 0.67001697  | 0.40406295  | 4.06383277  | c  |
| 0.22901570  | 2.17804876  | 5.98820984  | c  |
| -0.75233484 | 1.53107777  | 8.37143382  | c  |
| 1.77863807  | 1.16773372  | 1.29343972  | b  |
| 4.77659128  | 0.58874189  | 0.87268751  | c  |
| 5.91234574  | 0.92181901  | -1.51641186 | c  |
| 8.50205933  | 0.56412662  | -1.97983844 | c  |
| 10.10662690 | -0.14837139 | 0.01417509  | c  |
| 9.06785440  | -0.48335090 | 2.43221988  | c  |
| 6.46087207  | -0.12095815 | 2.80994708  | c  |
| 4.51069668  | 1.61281877  | -3.51759418 | f  |
| 9.43837302  | 0.90055307  | -4.31088555 | f  |
| 13.31687610 | -0.59577646 | -0.50306644 | c1 |
| 10.54697965 | -1.14501315 | 4.38447259  | f  |
| 5.65495555  | -0.47039055 | 5.20453051  | f  |
| 0.56408589  | -3.98255402 | 3.02705100  | f  |
| -1.39162453 | -5.28780300 | 7.52169855  | f  |
| -1.10441026 | 3.32554024  | 10.12935436 | f  |
| 0.82111510  | 4.63270877  | 5.64589644  | f  |
| -2.53467255 | -1.85032067 | 11.84734159 | c1 |
| 0.68306496  | 3.68301429  | -0.01790367 | c  |
| 1.40109800  | 6.23344811  | 0.22897842  | c  |
| 0.15947976  | 8.10605388  | -1.19167898 | c  |
| -1.79645300 | 7.43045030  | -2.86395314 | c  |
| -2.51020524 | 4.88314082  | -3.13230198 | c  |
| -1.27381231 | 2.99879626  | -1.71345776 | c  |
| -1.56954377 | -0.03299417 | -1.69249533 | b  |
| -3.87770041 | -1.33193791 | -0.11055217 | c  |
| -5.54791192 | 0.04205139  | 1.44705916  | c  |
| -7.53812720 | -1.08353125 | 2.80720575  | c  |
| -7.91688143 | -3.70696177 | 2.66743647  | c  |

|              |             |              |    |
|--------------|-------------|--------------|----|
| -6.28270134  | -5.15732788 | 1.15720615   | c  |
| -4.32083990  | -3.95920369 | -0.17145795  | c  |
| -5.32557177  | 2.55642725  | 1.71716721   | f  |
| -9.05803103  | 0.35161966  | 4.24145365   | f  |
| -10.35862361 | -5.13463326 | 4.33056900   | cl |
| -6.58508582  | -7.66990876 | 0.99100074   | f  |
| -2.82544355  | -5.49235731 | -1.54967777  | f  |
| -1.04490160  | -1.40102607 | -4.40688463  | c  |
| 1.07543726   | -2.85791082 | -5.05312935  | c  |
| 1.44130540   | -3.90099264 | -7.47035182  | c  |
| -0.39453952  | -3.53909086 | -9.35575824  | c  |
| -2.57373988  | -2.13696413 | -8.77118503  | c  |
| -2.84620510  | -1.11866743 | -6.33589801  | c  |
| 2.86965700   | -3.37655545 | -3.31994458  | f  |
| 3.52311720   | -5.26140754 | -7.96819278  | f  |
| -5.01171852  | 0.16815066  | -5.86942187  | f  |
| -4.38015792  | -1.78273509 | -10.51772656 | f  |
| 0.01290010   | -4.81749948 | -12.35430203 | cl |
| 2.93592624   | 6.78062900  | 1.53246021   | h  |
| 0.72270434   | 10.10705593 | -1.00215655  | h  |
| -2.76501544  | 8.90529051  | -3.97946933  | h  |
| -4.03123014  | 4.37784323  | -4.46400649  | h  |
| 0.56290722   | -0.64364495 | -0.24946298  | h  |

\$vibrational spectrum

| #     | mode | symmetry | wave number | IR intensity | selection |     |
|-------|------|----------|-------------|--------------|-----------|-----|
| rules |      |          | cm** (-1)   | km/mol       | IR        |     |
| #     |      |          |             |              |           |     |
| RAMAN |      |          |             |              |           |     |
| 1     |      |          | -0.00       | 0.00000      | -         | -   |
| 2     |      |          | -0.00       | 0.00000      | -         | -   |
| 3     |      |          | 0.00        | 0.00000      | -         | -   |
| 4     |      |          | 0.00        | 0.00000      | -         | -   |
| 5     |      |          | 0.00        | 0.00000      | -         | -   |
| 6     |      |          | 0.00        | 0.00000      | -         | -   |
| 7     |      | a        | 12.39       | 0.01212      | YES       | YES |
| 8     |      | a        | 14.60       | 0.02476      | YES       | YES |
| 9     |      | a        | 16.77       | 0.01172      | YES       | YES |
| 10    |      | a        | 22.01       | 0.01209      | YES       | YES |
| 11    |      | a        | 25.32       | 0.00746      | YES       | YES |
| 12    |      | a        | 26.87       | 0.01467      | YES       | YES |
| 13    |      | a        | 29.07       | 0.03671      | YES       | YES |
| 14    |      | a        | 31.91       | 0.03227      | YES       | YES |
| 15    |      | a        | 41.07       | 0.01073      | YES       | YES |
| 16    |      | a        | 51.19       | 0.01892      | YES       | YES |
| 17    |      | a        | 61.23       | 0.04581      | YES       | YES |
| 18    |      | a        | 69.77       | 0.07077      | YES       | YES |
| 19    |      | a        | 83.41       | 0.00629      | YES       | YES |
| 20    |      | a        | 92.57       | 0.19823      | YES       | YES |
| 21    |      | a        | 94.75       | 0.02745      | YES       | YES |
| 22    |      | a        | 99.60       | 0.03705      | YES       | YES |
| 23    |      | a        | 110.03      | 0.14305      | YES       | YES |
| 24    |      | a        | 121.25      | 0.00809      | YES       | YES |
| 25    |      | a        | 124.38      | 0.00664      | YES       | YES |

|    |   |        |          |     |     |
|----|---|--------|----------|-----|-----|
| 26 | a | 126.25 | 0.00564  | YES | YES |
| 27 | a | 130.51 | 0.03696  | YES | YES |
| 28 | a | 132.93 | 0.03548  | YES | YES |
| 29 | a | 134.71 | 0.04344  | YES | YES |
| 30 | a | 138.82 | 0.11629  | YES | YES |
| 31 | a | 141.15 | 0.07814  | YES | YES |
| 32 | a | 144.20 | 0.22669  | YES | YES |
| 33 | a | 146.68 | 0.07513  | YES | YES |
| 34 | a | 153.73 | 0.23833  | YES | YES |
| 35 | a | 164.75 | 0.05206  | YES | YES |
| 36 | a | 192.09 | 0.02186  | YES | YES |
| 37 | a | 192.55 | 0.13836  | YES | YES |
| 38 | a | 193.18 | 0.06168  | YES | YES |
| 39 | a | 193.50 | 0.02794  | YES | YES |
| 40 | a | 206.25 | 1.51022  | YES | YES |
| 41 | a | 211.90 | 1.22495  | YES | YES |
| 42 | a | 219.56 | 2.30158  | YES | YES |
| 43 | a | 220.06 | 0.33031  | YES | YES |
| 44 | a | 229.19 | 0.16262  | YES | YES |
| 45 | a | 258.16 | 2.69169  | YES | YES |
| 46 | a | 267.62 | 4.60904  | YES | YES |
| 47 | a | 277.04 | 0.23739  | YES | YES |
| 48 | a | 278.20 | 0.05902  | YES | YES |
| 49 | a | 279.57 | 0.04503  | YES | YES |
| 50 | a | 281.76 | 1.75670  | YES | YES |
| 51 | a | 300.79 | 0.11757  | YES | YES |
| 52 | a | 303.27 | 0.17633  | YES | YES |
| 53 | a | 307.11 | 0.20789  | YES | YES |
| 54 | a | 308.84 | 0.21319  | YES | YES |
| 55 | a | 318.60 | 0.54399  | YES | YES |
| 56 | a | 320.78 | 0.50841  | YES | YES |
| 57 | a | 325.57 | 0.88896  | YES | YES |
| 58 | a | 326.30 | 0.06168  | YES | YES |
| 59 | a | 341.80 | 0.08851  | YES | YES |
| 60 | a | 350.82 | 1.02637  | YES | YES |
| 61 | a | 362.55 | 0.23666  | YES | YES |
| 62 | a | 371.03 | 1.57306  | YES | YES |
| 63 | a | 393.33 | 0.02650  | YES | YES |
| 64 | a | 396.02 | 0.50849  | YES | YES |
| 65 | a | 399.70 | 0.26275  | YES | YES |
| 66 | a | 400.62 | 0.06636  | YES | YES |
| 67 | a | 407.06 | 4.90576  | YES | YES |
| 68 | a | 422.54 | 0.20476  | YES | YES |
| 69 | a | 432.06 | 0.11157  | YES | YES |
| 70 | a | 432.21 | 0.43051  | YES | YES |
| 71 | a | 432.53 | 0.02179  | YES | YES |
| 72 | a | 433.38 | 0.01039  | YES | YES |
| 73 | a | 452.24 | 0.72986  | YES | YES |
| 74 | a | 454.49 | 0.75196  | YES | YES |
| 75 | a | 460.62 | 10.77420 | YES | YES |
| 76 | a | 500.86 | 3.40293  | YES | YES |
| 77 | a | 501.60 | 2.42036  | YES | YES |
| 78 | a | 502.20 | 1.69106  | YES | YES |
| 79 | a | 503.03 | 1.63432  | YES | YES |
| 80 | a | 506.64 | 4.91874  | YES | YES |
| 81 | a | 533.92 | 35.82743 | YES | YES |
| 82 | a | 552.90 | 0.32381  | YES | YES |

|     |   |         |           |     |     |
|-----|---|---------|-----------|-----|-----|
| 83  | a | 568.28  | 2.40484   | YES | YES |
| 84  | a | 571.56  | 2.47910   | YES | YES |
| 85  | a | 578.55  | 17.01000  | YES | YES |
| 86  | a | 592.31  | 5.17427   | YES | YES |
| 87  | a | 602.90  | 8.09225   | YES | YES |
| 88  | a | 609.62  | 29.74824  | YES | YES |
| 89  | a | 626.67  | 118.46256 | YES | YES |
| 90  | a | 638.40  | 0.35676   | YES | YES |
| 91  | a | 638.93  | 2.82808   | YES | YES |
| 92  | a | 641.33  | 3.20208   | YES | YES |
| 93  | a | 642.19  | 0.29152   | YES | YES |
| 94  | a | 643.64  | 2.05597   | YES | YES |
| 95  | a | 662.18  | 24.15964  | YES | YES |
| 96  | a | 683.19  | 22.65770  | YES | YES |
| 97  | a | 692.08  | 10.86356  | YES | YES |
| 98  | a | 698.13  | 83.79527  | YES | YES |
| 99  | a | 719.65  | 7.28895   | YES | YES |
| 100 | a | 726.56  | 6.48684   | YES | YES |
| 101 | a | 737.66  | 72.28414  | YES | YES |
| 102 | a | 743.54  | 15.04169  | YES | YES |
| 103 | a | 749.57  | 5.95865   | YES | YES |
| 104 | a | 770.61  | 6.79400   | YES | YES |
| 105 | a | 775.07  | 7.85139   | YES | YES |
| 106 | a | 778.31  | 30.83635  | YES | YES |
| 107 | a | 851.20  | 147.78185 | YES | YES |
| 108 | a | 856.45  | 10.02149  | YES | YES |
| 109 | a | 860.07  | 1.08012   | YES | YES |
| 110 | a | 868.52  | 16.40571  | YES | YES |
| 111 | a | 872.86  | 4.90724   | YES | YES |
| 112 | a | 929.23  | 4.84401   | YES | YES |
| 113 | a | 952.60  | 29.15535  | YES | YES |
| 114 | a | 956.72  | 126.43641 | YES | YES |
| 115 | a | 961.10  | 120.11171 | YES | YES |
| 116 | a | 963.12  | 80.97857  | YES | YES |
| 117 | a | 964.59  | 56.24624  | YES | YES |
| 118 | a | 970.70  | 28.99324  | YES | YES |
| 119 | a | 974.36  | 80.11081  | YES | YES |
| 120 | a | 996.03  | 33.54690  | YES | YES |
| 121 | a | 1024.82 | 15.41173  | YES | YES |
| 122 | a | 1032.11 | 6.83691   | YES | YES |
| 123 | a | 1040.36 | 106.52893 | YES | YES |
| 124 | a | 1068.70 | 5.51499   | YES | YES |
| 125 | a | 1131.61 | 0.73162   | YES | YES |
| 126 | a | 1135.19 | 1.02788   | YES | YES |
| 127 | a | 1136.31 | 2.27426   | YES | YES |
| 128 | a | 1139.54 | 0.14409   | YES | YES |
| 129 | a | 1141.88 | 2.27049   | YES | YES |
| 130 | a | 1147.04 | 3.73616   | YES | YES |
| 131 | a | 1195.82 | 11.49951  | YES | YES |
| 132 | a | 1239.67 | 46.31303  | YES | YES |
| 133 | a | 1244.54 | 32.91392  | YES | YES |
| 134 | a | 1247.81 | 31.92884  | YES | YES |
| 135 | a | 1249.63 | 88.30149  | YES | YES |
| 136 | a | 1252.12 | 79.48791  | YES | YES |
| 137 | a | 1339.45 | 4.58067   | YES | YES |
| 138 | a | 1341.59 | 7.08335   | YES | YES |
| 139 | a | 1342.72 | 12.77942  | YES | YES |

|     |   |         |            |     |     |
|-----|---|---------|------------|-----|-----|
| 140 | a | 1348.29 | 29.35806   | YES | YES |
| 141 | a | 1350.74 | 18.76001   | YES | YES |
| 142 | a | 1367.45 | 156.28430  | YES | YES |
| 143 | a | 1375.90 | 2.89286    | YES | YES |
| 144 | a | 1378.20 | 21.30271   | YES | YES |
| 145 | a | 1382.27 | 13.76192   | YES | YES |
| 146 | a | 1431.15 | 11.39225   | YES | YES |
| 147 | a | 1446.27 | 127.05890  | YES | YES |
| 148 | a | 1447.61 | 46.68395   | YES | YES |
| 149 | a | 1448.60 | 161.01958  | YES | YES |
| 150 | a | 1449.55 | 60.40050   | YES | YES |
| 151 | a | 1454.14 | 123.49313  | YES | YES |
| 152 | a | 1456.40 | 170.72001  | YES | YES |
| 153 | a | 1458.28 | 163.03965  | YES | YES |
| 154 | a | 1459.31 | 437.05557  | YES | YES |
| 155 | a | 1464.34 | 560.96540  | YES | YES |
| 156 | a | 1493.82 | 192.74386  | YES | YES |
| 157 | a | 1578.41 | 5.34169    | YES | YES |
| 158 | a | 1586.91 | 90.97820   | YES | YES |
| 159 | a | 1590.58 | 4.75273    | YES | YES |
| 160 | a | 1592.26 | 18.58175   | YES | YES |
| 161 | a | 1595.29 | 8.76655    | YES | YES |
| 162 | a | 1598.65 | 17.99013   | YES | YES |
| 163 | a | 1606.19 | 19.72075   | YES | YES |
| 164 | a | 1607.10 | 44.63512   | YES | YES |
| 165 | a | 1612.28 | 3.57952    | YES | YES |
| 166 | a | 1613.34 | 9.67053    | YES | YES |
| 167 | a | 1635.36 | 1186.88937 | YES | YES |
| 168 | a | 3058.42 | 0.81500    | YES | YES |
| 169 | a | 3072.32 | 33.33921   | YES | YES |
| 170 | a | 3085.68 | 64.69776   | YES | YES |
| 171 | a | 3101.63 | 28.52518   | YES | YES |

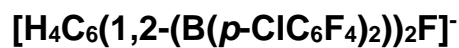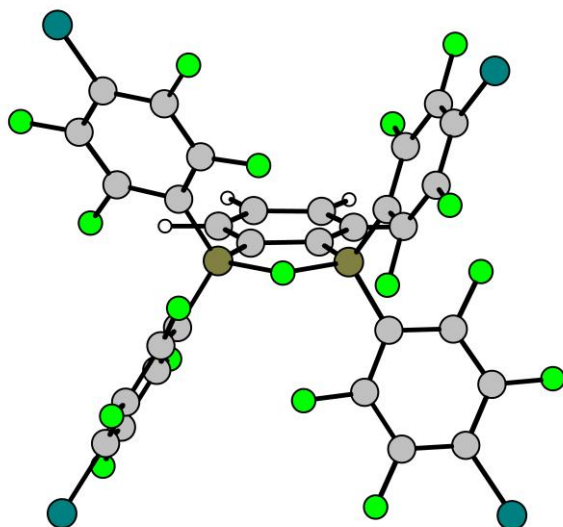

\$coord

|             |             |             |    |
|-------------|-------------|-------------|----|
| 5.61580426  | -0.83034229 | -1.89148485 | c  |
| 4.87575130  | 0.59918660  | 0.21968937  | c  |
| 6.82057269  | 2.01716998  | 1.34674929  | c  |
| 9.33133194  | 2.03912959  | 0.48830894  | c  |
| 9.99011079  | 0.58051028  | -1.63154865 | c  |
| 8.10691813  | -0.86059659 | -2.82602193 | c  |
| 2.00816547  | 0.87073339  | 1.37505448  | b  |
| 1.95539023  | 0.15042110  | 4.38474788  | c  |
| 1.02284210  | 1.69396610  | 6.33332848  | c  |
| 1.04360450  | 0.97121940  | 8.89369661  | c  |
| 2.00760117  | -1.40148254 | 9.59062210  | c  |
| 2.94257116  | -3.01435121 | 7.69724984  | c  |
| 2.89596988  | -2.21189105 | 5.16764318  | c  |
| 0.05662228  | 3.99515557  | 5.84929876  | f  |
| 0.13663533  | 2.55262774  | 10.65805424 | f  |
| 2.04544466  | -2.33057474 | 12.73926649 | cl |
| 3.87080675  | -5.29710630 | 8.30075453  | f  |
| 3.82144710  | -3.84941987 | 3.44783050  | f  |
| 6.30964663  | 3.48017016  | 3.38719711  | f  |
| 11.08031466 | 3.43898411  | 1.67977569  | f  |
| 13.07384209 | 0.57027717  | -2.76082630 | cl |
| 8.67922214  | -2.26987131 | -4.85406116 | f  |
| 3.93899284  | -2.26529502 | -3.15982860 | f  |
| 0.58057140  | 3.32572941  | 0.30222543  | c  |
| -1.52684092 | 2.74849813  | -1.26612340 | c  |
| -2.94131004 | 4.74957684  | -2.32747855 | c  |
| -2.25312503 | 7.27681483  | -1.91130581 | c  |
| -0.12539731 | 7.84291891  | -0.41922156 | c  |
| 1.27663550  | 5.87570854  | 0.67441278  | c  |
| -2.07711848 | -0.23266837 | -1.50538654 | b  |
| -4.74367952 | -1.05300392 | -0.13879618 | c  |
| -7.00848952 | -0.55723383 | -1.43751101 | c  |
| -9.42212770 | -1.05991452 | -0.45763015 | c  |
| -9.64395838 | -2.14395465 | 1.95745627  | c  |
| -7.43116030 | -2.69015899 | 3.31922839  | c  |

|              |             |              |    |
|--------------|-------------|--------------|----|
| -5.05017734  | -2.14687104 | 2.26092603   | c  |
| -6.93140661  | 0.46372329  | -3.78621473  | f  |
| -11.49220811 | -0.51149374 | -1.81760939  | f  |
| -12.59909689 | -2.79178180 | 3.23457276   | cl |
| -7.58158495  | -3.73452777 | 5.62453029   | f  |
| -3.03813712  | -2.74178396 | 3.70029679   | f  |
| -1.72684829  | -1.75728514 | -4.17605722  | c  |
| -1.36467933  | -0.65933888 | -6.56553361  | c  |
| -1.10211765  | -2.09005335 | -8.79412402  | c  |
| -1.17386771  | -4.74091025 | -8.67997903  | c  |
| -1.51509700  | -5.91753804 | -6.32259233  | c  |
| -1.78144855  | -4.41699100 | -4.14959480  | c  |
| -1.26594478  | 1.86435124  | -6.85568697  | f  |
| -0.77850264  | -0.91827041 | -11.02116862 | f  |
| -0.84888859  | -6.53767806 | -11.40870092 | cl |
| -1.58905352  | -8.44715344 | -6.14995283  | f  |
| -2.10745409  | -5.66273474 | -1.94986249  | f  |
| -4.59427334  | 4.33149691  | -3.52207691  | h  |
| -3.37460840  | 8.81576195  | -2.76474147  | h  |
| 0.43449222   | 9.82756351  | -0.09941263  | h  |
| 2.92474813   | 6.33749299  | 1.86260742   | h  |
| 0.24254679   | -1.27691093 | 0.15500901   | f  |

\$vibrational spectrum

| # mode | symmetry | wave number | IR intensity | selection |     |
|--------|----------|-------------|--------------|-----------|-----|
| rules  |          | cm**(-1)    | km/mol       | IR        |     |
| #      |          |             |              |           |     |
| RAMAN  |          |             |              |           |     |
| 1      |          | -0.00       | 0.00000      | -         | -   |
| 2      |          | -0.00       | 0.00000      | -         | -   |
| 3      |          | -0.00       | 0.00000      | -         | -   |
| 4      |          | 0.00        | 0.00000      | -         | -   |
| 5      |          | 0.00        | 0.00000      | -         | -   |
| 6      |          | 0.00        | 0.00000      | -         | -   |
| 7      | a        | 13.15       | 0.00383      | YES       | YES |
| 8      | a        | 14.17       | 0.00992      | YES       | YES |
| 9      | a        | 19.24       | 0.00249      | YES       | YES |
| 10     | a        | 20.17       | 0.03172      | YES       | YES |
| 11     | a        | 21.46       | 0.01850      | YES       | YES |
| 12     | a        | 22.94       | 0.00298      | YES       | YES |
| 13     | a        | 24.89       | 0.06137      | YES       | YES |
| 14     | a        | 30.82       | 0.01375      | YES       | YES |
| 15     | a        | 31.98       | 0.06075      | YES       | YES |
| 16     | a        | 50.14       | 0.13168      | YES       | YES |
| 17     | a        | 58.64       | 0.02585      | YES       | YES |
| 18     | a        | 68.88       | 0.04929      | YES       | YES |
| 19     | a        | 86.14       | 0.02455      | YES       | YES |
| 20     | a        | 92.15       | 0.02716      | YES       | YES |
| 21     | a        | 93.40       | 0.02916      | YES       | YES |
| 22     | a        | 95.87       | 0.03823      | YES       | YES |
| 23     | a        | 116.00      | 0.00014      | YES       | YES |
| 24     | a        | 122.61      | 0.00986      | YES       | YES |
| 25     | a        | 123.01      | 0.00920      | YES       | YES |
| 26     | a        | 123.39      | 0.01974      | YES       | YES |
| 27     | a        | 126.86      | 0.03402      | YES       | YES |
| 28     | a        | 131.33      | 0.10600      | YES       | YES |



|    |   |        |           |     |     |
|----|---|--------|-----------|-----|-----|
| 29 | a | 134.06 | 0.00084   | YES | YES |
| 30 | a | 135.19 | 0.00791   | YES | YES |
| 31 | a | 141.06 | 0.00004   | YES | YES |
| 32 | a | 145.26 | 0.00582   | YES | YES |
| 33 | a | 146.56 | 0.17771   | YES | YES |
| 34 | a | 152.38 | 0.24138   | YES | YES |
| 35 | a | 156.76 | 0.26951   | YES | YES |
| 36 | a | 191.90 | 0.13786   | YES | YES |
| 37 | a | 191.96 | 0.07325   | YES | YES |
| 38 | a | 192.70 | 0.04780   | YES | YES |
| 39 | a | 193.07 | 0.02461   | YES | YES |
| 40 | a | 198.43 | 1.20601   | YES | YES |
| 41 | a | 209.00 | 1.36486   | YES | YES |
| 42 | a | 212.32 | 1.70607   | YES | YES |
| 43 | a | 219.92 | 0.08074   | YES | YES |
| 44 | a | 222.21 | 0.30369   | YES | YES |
| 45 | a | 253.79 | 0.35426   | YES | YES |
| 46 | a | 257.94 | 1.01043   | YES | YES |
| 47 | a | 269.31 | 0.23125   | YES | YES |
| 48 | a | 276.16 | 0.00771   | YES | YES |
| 49 | a | 277.45 | 0.09056   | YES | YES |
| 50 | a | 278.20 | 0.16330   | YES | YES |
| 51 | a | 281.18 | 0.16125   | YES | YES |
| 52 | a | 303.85 | 0.09171   | YES | YES |
| 53 | a | 304.34 | 0.39521   | YES | YES |
| 54 | a | 304.88 | 0.08713   | YES | YES |
| 55 | a | 308.62 | 0.45831   | YES | YES |
| 56 | a | 320.50 | 0.33483   | YES | YES |
| 57 | a | 321.05 | 1.42578   | YES | YES |
| 58 | a | 322.53 | 0.15047   | YES | YES |
| 59 | a | 324.90 | 0.08077   | YES | YES |
| 60 | a | 340.18 | 4.14889   | YES | YES |
| 61 | a | 351.87 | 0.15314   | YES | YES |
| 62 | a | 370.11 | 0.09410   | YES | YES |
| 63 | a | 375.81 | 1.71483   | YES | YES |
| 64 | a | 395.23 | 0.23495   | YES | YES |
| 65 | a | 396.05 | 0.88281   | YES | YES |
| 66 | a | 397.32 | 0.46635   | YES | YES |
| 67 | a | 398.54 | 0.07892   | YES | YES |
| 68 | a | 420.96 | 11.40230  | YES | YES |
| 69 | a | 424.09 | 0.29436   | YES | YES |
| 70 | a | 431.12 | 3.96631   | YES | YES |
| 71 | a | 431.72 | 0.27542   | YES | YES |
| 72 | a | 432.21 | 0.30173   | YES | YES |
| 73 | a | 432.33 | 0.20864   | YES | YES |
| 74 | a | 441.70 | 41.23489  | YES | YES |
| 75 | a | 445.45 | 2.91929   | YES | YES |
| 76 | a | 454.02 | 0.20987   | YES | YES |
| 77 | a | 460.22 | 51.32908  | YES | YES |
| 78 | a | 464.61 | 14.05131  | YES | YES |
| 79 | a | 500.34 | 0.09852   | YES | YES |
| 80 | a | 501.28 | 2.27725   | YES | YES |
| 81 | a | 502.25 | 0.65104   | YES | YES |
| 82 | a | 502.52 | 1.84465   | YES | YES |
| 83 | a | 506.08 | 0.65703   | YES | YES |
| 84 | a | 544.94 | 100.96198 | YES | YES |
| 85 | a | 568.07 | 0.60644   | YES | YES |

|     |   |         |           |     |     |
|-----|---|---------|-----------|-----|-----|
| 86  | a | 571.97  | 12.65675  | YES | YES |
| 87  | a | 574.40  | 0.02594   | YES | YES |
| 88  | a | 580.79  | 37.37066  | YES | YES |
| 89  | a | 610.38  | 152.22479 | YES | YES |
| 90  | a | 622.90  | 9.60681   | YES | YES |
| 91  | a | 631.48  | 1.37251   | YES | YES |
| 92  | a | 636.50  | 62.64574  | YES | YES |
| 93  | a | 637.80  | 33.10448  | YES | YES |
| 94  | a | 639.70  | 6.61739   | YES | YES |
| 95  | a | 642.43  | 4.02318   | YES | YES |
| 96  | a | 644.32  | 1.38626   | YES | YES |
| 97  | a | 656.87  | 0.31537   | YES | YES |
| 98  | a | 675.88  | 1.81262   | YES | YES |
| 99  | a | 691.56  | 39.56520  | YES | YES |
| 100 | a | 702.16  | 178.06383 | YES | YES |
| 101 | a | 706.17  | 4.98386   | YES | YES |
| 102 | a | 718.37  | 4.56013   | YES | YES |
| 103 | a | 727.45  | 5.76217   | YES | YES |
| 104 | a | 742.79  | 58.07035  | YES | YES |
| 105 | a | 748.01  | 19.14910  | YES | YES |
| 106 | a | 757.16  | 18.67402  | YES | YES |
| 107 | a | 769.39  | 3.24200   | YES | YES |
| 108 | a | 778.54  | 27.49382  | YES | YES |
| 109 | a | 819.34  | 47.24291  | YES | YES |
| 110 | a | 854.71  | 2.42563   | YES | YES |
| 111 | a | 857.30  | 67.31779  | YES | YES |
| 112 | a | 870.43  | 7.37048   | YES | YES |
| 113 | a | 875.64  | 7.64301   | YES | YES |
| 114 | a | 876.05  | 2.29245   | YES | YES |
| 115 | a | 935.02  | 5.38947   | YES | YES |
| 116 | a | 958.39  | 100.43508 | YES | YES |
| 117 | a | 961.77  | 46.07965  | YES | YES |
| 118 | a | 964.33  | 171.23442 | YES | YES |
| 119 | a | 965.37  | 121.44902 | YES | YES |
| 120 | a | 966.78  | 3.77276   | YES | YES |
| 121 | a | 970.99  | 160.72870 | YES | YES |
| 122 | a | 977.48  | 22.88226  | YES | YES |
| 123 | a | 1006.56 | 104.44507 | YES | YES |
| 124 | a | 1009.77 | 71.46830  | YES | YES |
| 125 | a | 1040.82 | 3.38833   | YES | YES |
| 126 | a | 1075.90 | 23.39611  | YES | YES |
| 127 | a | 1132.19 | 0.09374   | YES | YES |
| 128 | a | 1133.18 | 1.26880   | YES | YES |
| 129 | a | 1138.74 | 1.16993   | YES | YES |
| 130 | a | 1140.03 | 0.01502   | YES | YES |
| 131 | a | 1140.45 | 6.50992   | YES | YES |
| 132 | a | 1159.31 | 15.05339  | YES | YES |
| 133 | a | 1192.90 | 29.77444  | YES | YES |
| 134 | a | 1239.90 | 124.25384 | YES | YES |
| 135 | a | 1242.23 | 5.28026   | YES | YES |
| 136 | a | 1249.42 | 135.21702 | YES | YES |
| 137 | a | 1251.98 | 53.10113  | YES | YES |
| 138 | a | 1255.14 | 31.49171  | YES | YES |
| 139 | a | 1333.31 | 0.33598   | YES | YES |
| 140 | a | 1343.97 | 1.61829   | YES | YES |
| 141 | a | 1344.35 | 0.62558   | YES | YES |
| 142 | a | 1348.06 | 3.22982   | YES | YES |

|     |   |         |           |     |     |
|-----|---|---------|-----------|-----|-----|
| 143 | a | 1349.07 | 0.22053   | YES | YES |
| 144 | a | 1374.82 | 18.57388  | YES | YES |
| 145 | a | 1376.34 | 1.04775   | YES | YES |
| 146 | a | 1384.07 | 35.41614  | YES | YES |
| 147 | a | 1385.09 | 11.73258  | YES | YES |
| 148 | a | 1427.47 | 21.18562  | YES | YES |
| 149 | a | 1446.28 | 15.80655  | YES | YES |
| 150 | a | 1447.26 | 232.25097 | YES | YES |
| 151 | a | 1447.71 | 25.10366  | YES | YES |
| 152 | a | 1447.97 | 30.16133  | YES | YES |
| 153 | a | 1450.93 | 0.61096   | YES | YES |
| 154 | a | 1458.93 | 9.51753   | YES | YES |
| 155 | a | 1460.69 | 518.72449 | YES | YES |
| 156 | a | 1464.46 | 280.24369 | YES | YES |
| 157 | a | 1469.26 | 809.44263 | YES | YES |
| 158 | a | 1568.05 | 0.26799   | YES | YES |
| 159 | a | 1592.70 | 9.88197   | YES | YES |
| 160 | a | 1593.14 | 4.51172   | YES | YES |
| 161 | a | 1594.43 | 3.49713   | YES | YES |
| 162 | a | 1595.52 | 8.53565   | YES | YES |
| 163 | a | 1603.68 | 1.57403   | YES | YES |
| 164 | a | 1609.72 | 32.31737  | YES | YES |
| 165 | a | 1610.08 | 16.07330  | YES | YES |
| 166 | a | 1611.42 | 5.19349   | YES | YES |
| 167 | a | 1612.05 | 24.12543  | YES | YES |
| 168 | a | 3065.08 | 4.36448   | YES | YES |
| 169 | a | 3082.74 | 48.07945  | YES | YES |
| 170 | a | 3100.96 | 29.74001  | YES | YES |
| 171 | a | 3110.20 | 19.10729  | YES | YES |

# H<sub>6</sub>C<sub>10</sub>(1,8-(B(*p*-ClC<sub>6</sub>F<sub>4</sub>)<sub>2</sub>))<sub>2</sub> (9)

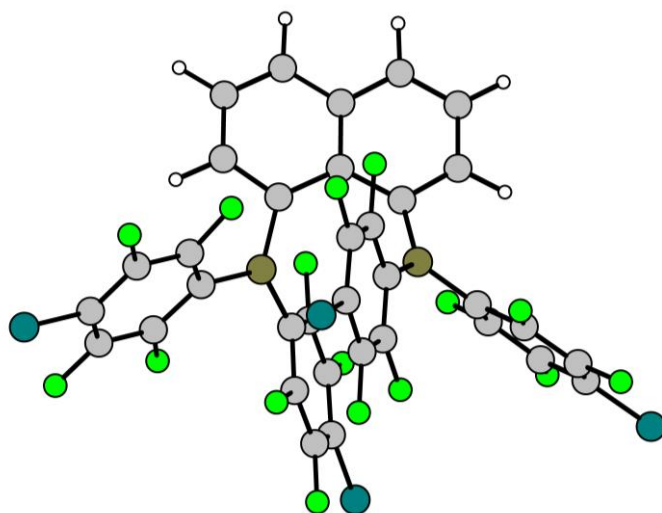

\$coord

|              |             |             |    |
|--------------|-------------|-------------|----|
| 1.44845560   | 2.95309298  | -3.73912264 | c  |
| 1.36104460   | 3.04309317  | -1.06683960 | c  |
| 3.66522541   | 3.67166460  | 0.13163120  | c  |
| 5.89954370   | 4.17116309  | -1.21141777 | c  |
| 5.91081116   | 3.99474022  | -3.86350121 | c  |
| 3.65481504   | 3.37252150  | -5.13794534 | c  |
| -1.20797943  | 2.85625311  | 0.45618230  | b  |
| -3.64436311  | 4.13277845  | -0.77785517 | c  |
| -3.50796990  | 6.41926069  | -2.15319209 | c  |
| -5.62950265  | 7.61974300  | -3.19921608 | c  |
| -8.03722385  | 6.52551067  | -2.90547172 | c  |
| -8.26708416  | 4.25804921  | -1.53429000 | c  |
| -6.10355175  | 3.13853678  | -0.47933763 | c  |
| -1.27879695  | 7.59973012  | -2.46411716 | f  |
| -5.36016349  | 9.79583242  | -4.44690100 | f  |
| -10.67198808 | 7.95603153  | -4.18877886 | cl |
| -10.52719913 | 3.18716156  | -1.20823559 | f  |
| -6.47843252  | 1.00816206  | 0.85592052  | f  |
| 3.78732568   | 3.90062089  | 2.65036601  | f  |
| 8.00152309   | 4.78283388  | 0.03873152  | f  |
| 8.64983845   | 4.55362274  | -5.54343386 | cl |
| 3.61214962   | 3.22104914  | -7.65524122 | f  |
| -0.67000706  | 2.47189220  | -5.06009370 | f  |
| -1.37083006  | 1.97873983  | 3.28114242  | c  |
| -0.00750280  | -0.03470731 | 4.55101309  | c  |
| -0.01265767  | -0.05201991 | 7.29175791  | c  |
| -1.40621864  | 1.79274626  | 8.67994943  | c  |
| -2.80306765  | 3.62485839  | 7.44309749  | c  |
| -2.78232229  | 3.68141634  | 4.77320032  | c  |
| 1.37510172   | -1.91461494 | 8.66182296  | c  |
| 2.77571737   | -3.73162714 | 7.40711275  | c  |
| 2.76523651   | -3.75430928 | 4.73652690  | c  |
| 1.35995459   | -2.03226613 | 3.26136164  | c  |
| 1.20636236   | -2.87479875 | 0.42480561  | b  |
| 3.65443348   | -4.11487149 | -0.82345709 | c  |
| 6.10663231   | -3.11232002 | -0.49189851 | c  |
| 8.28077421   | -4.18945546 | -1.56916183 | c  |

|             |             |             |    |
|-------------|-------------|-------------|----|
| 8.07091405  | -6.42399568 | -2.99613515 | c  |
| 5.67208145  | -7.52828488 | -3.32300153 | c  |
| 3.53929752  | -6.36999632 | -2.25229110 | c  |
| 6.46478299  | -1.01439802 | 0.89804784  | f  |
| 10.53228588 | -3.11031364 | -1.21206611 | f  |
| 1.32023478  | -7.56019046 | -2.59593746 | f  |
| 5.42309020  | -9.67402876 | -4.62636802 | f  |
| 10.71918640 | -7.80362015 | -4.30680028 | cl |
| -1.36392796 | -3.05598103 | -1.09736298 | c  |
| -3.66598733 | -3.69701315 | 0.09941403  | c  |
| -5.90332904 | -4.18291976 | -1.24351138 | c  |
| -5.92070714 | -3.98036497 | -3.89356758 | c  |
| -3.66776162 | -3.34443832 | -5.16642100 | c  |
| -1.45844699 | -2.93784956 | -3.76839756 | c  |
| -3.78409021 | -3.95121974 | 2.61600219  | f  |
| -8.00266644 | -4.80587472 | 0.00557481  | f  |
| 0.65550879  | -2.44003688 | -5.09022534 | f  |
| -3.63052109 | -3.16735782 | -7.68213034 | f  |
| -8.66336424 | -4.52280619 | -5.57284328 | cl |
| 3.84284104  | -5.25564474 | 3.77693621  | h  |
| 3.86847137  | -5.15793889 | 8.45986788  | h  |
| 1.31662164  | -1.86521695 | 10.74495501 | h  |
| -1.35565864 | 1.71718273  | 10.76252529 | h  |
| -3.90046483 | 5.03735033  | 8.50957289  | h  |
| -3.85647429 | 5.19484317  | 3.82904894  | h  |

\$vibrational spectrum

| #     | mode | symmetry | wave number | IR intensity | selection |     |
|-------|------|----------|-------------|--------------|-----------|-----|
| rules |      |          | cm**(-1)    | km/mol       | IR        |     |
| #     |      |          |             |              |           |     |
| RAMAN |      |          |             |              |           |     |
| 1     |      |          | -0.00       | 0.00000      | -         | -   |
| 2     |      |          | 0.00        | 0.00000      | -         | -   |
| 3     |      |          | 0.00        | 0.00000      | -         | -   |
| 4     |      |          | 0.00        | 0.00000      | -         | -   |
| 5     |      |          | 0.00        | 0.00000      | -         | -   |
| 6     |      |          | 0.00        | 0.00000      | -         | -   |
| 7     |      | a        | 8.98        | 0.06717      | YES       | YES |
| 8     |      | a        | 9.84        | 0.07701      | YES       | YES |
| 9     |      | a        | 13.33       | 0.08876      | YES       | YES |
| 10    |      | a        | 23.81       | 0.19513      | YES       | YES |
| 11    |      | a        | 25.01       | 0.12908      | YES       | YES |
| 12    |      | a        | 27.85       | 0.14098      | YES       | YES |
| 13    |      | a        | 29.97       | 0.00046      | YES       | YES |
| 14    |      | a        | 35.43       | 0.04992      | YES       | YES |
| 15    |      | a        | 43.47       | 0.00281      | YES       | YES |
| 16    |      | a        | 48.00       | 0.46365      | YES       | YES |
| 17    |      | a        | 55.17       | 0.09464      | YES       | YES |
| 18    |      | a        | 55.72       | 0.01509      | YES       | YES |
| 19    |      | a        | 71.83       | 0.03636      | YES       | YES |
| 20    |      | a        | 77.01       | 0.21858      | YES       | YES |
| 21    |      | a        | 93.50       | 0.47444      | YES       | YES |
| 22    |      | a        | 98.94       | 0.01216      | YES       | YES |
| 23    |      | a        | 101.91      | 0.15693      | YES       | YES |
| 24    |      | a        | 108.01      | 0.16359      | YES       | YES |
| 25    |      | a        | 122.91      | 0.08172      | YES       | YES |

|    |   |        |         |     |     |
|----|---|--------|---------|-----|-----|
| 26 | a | 126.72 | 0.39585 | YES | YES |
| 27 | a | 128.16 | 0.26020 | YES | YES |
| 28 | a | 128.85 | 0.13817 | YES | YES |
| 29 | a | 131.84 | 0.00478 | YES | YES |
| 30 | a | 132.43 | 0.01681 | YES | YES |
| 31 | a | 137.42 | 0.00320 | YES | YES |
| 32 | a | 138.59 | 0.07516 | YES | YES |
| 33 | a | 143.64 | 0.00405 | YES | YES |
| 34 | a | 150.83 | 0.08968 | YES | YES |
| 35 | a | 156.50 | 1.00379 | YES | YES |
| 36 | a | 177.49 | 0.01660 | YES | YES |
| 37 | a | 189.47 | 0.08237 | YES | YES |
| 38 | a | 190.05 | 0.53988 | YES | YES |
| 39 | a | 195.00 | 0.07441 | YES | YES |
| 40 | a | 195.19 | 0.03542 | YES | YES |
| 41 | a | 197.11 | 0.04993 | YES | YES |
| 42 | a | 197.25 | 0.11386 | YES | YES |
| 43 | a | 222.06 | 0.18891 | YES | YES |
| 44 | a | 224.76 | 0.08250 | YES | YES |
| 45 | a | 226.03 | 5.47651 | YES | YES |
| 46 | a | 229.90 | 2.37235 | YES | YES |
| 47 | a | 241.91 | 3.57247 | YES | YES |
| 48 | a | 254.34 | 2.22060 | YES | YES |
| 49 | a | 276.68 | 0.00653 | YES | YES |
| 50 | a | 278.11 | 0.05711 | YES | YES |
| 51 | a | 280.10 | 0.10651 | YES | YES |
| 52 | a | 280.15 | 0.03304 | YES | YES |
| 53 | a | 302.69 | 0.12597 | YES | YES |
| 54 | a | 303.42 | 0.04412 | YES | YES |
| 55 | a | 305.56 | 0.08981 | YES | YES |
| 56 | a | 305.83 | 0.14340 | YES | YES |
| 57 | a | 321.79 | 0.39517 | YES | YES |
| 58 | a | 322.26 | 0.22370 | YES | YES |
| 59 | a | 323.23 | 0.31025 | YES | YES |
| 60 | a | 323.90 | 0.02072 | YES | YES |
| 61 | a | 335.77 | 0.43484 | YES | YES |
| 62 | a | 346.03 | 5.36226 | YES | YES |
| 63 | a | 366.01 | 0.45776 | YES | YES |
| 64 | a | 374.11 | 4.25890 | YES | YES |
| 65 | a | 398.37 | 0.24465 | YES | YES |
| 66 | a | 398.54 | 1.33166 | YES | YES |
| 67 | a | 404.44 | 0.43808 | YES | YES |
| 68 | a | 404.62 | 2.78285 | YES | YES |
| 69 | a | 409.84 | 0.22848 | YES | YES |
| 70 | a | 415.68 | 0.17548 | YES | YES |
| 71 | a | 426.25 | 8.79197 | YES | YES |
| 72 | a | 430.11 | 1.75224 | YES | YES |
| 73 | a | 430.36 | 0.95029 | YES | YES |
| 74 | a | 432.72 | 0.02255 | YES | YES |
| 75 | a | 433.99 | 6.50079 | YES | YES |
| 76 | a | 450.65 | 2.89900 | YES | YES |
| 77 | a | 462.27 | 2.06403 | YES | YES |
| 78 | a | 464.42 | 0.73982 | YES | YES |
| 79 | a | 470.22 | 1.65047 | YES | YES |
| 80 | a | 502.07 | 4.03605 | YES | YES |
| 81 | a | 503.40 | 0.41858 | YES | YES |
| 82 | a | 504.17 | 1.31793 | YES | YES |

|     |   |         |           |     |     |
|-----|---|---------|-----------|-----|-----|
| 83  | a | 504.24  | 0.33332   | YES | YES |
| 84  | a | 505.25  | 4.77442   | YES | YES |
| 85  | a | 514.31  | 0.27953   | YES | YES |
| 86  | a | 519.47  | 8.43347   | YES | YES |
| 87  | a | 544.59  | 0.12823   | YES | YES |
| 88  | a | 565.58  | 16.85273  | YES | YES |
| 89  | a | 575.54  | 7.65526   | YES | YES |
| 90  | a | 579.02  | 0.36947   | YES | YES |
| 91  | a | 592.26  | 1.07654   | YES | YES |
| 92  | a | 593.28  | 3.04623   | YES | YES |
| 93  | a | 601.28  | 23.67132  | YES | YES |
| 94  | a | 628.97  | 8.52314   | YES | YES |
| 95  | a | 634.70  | 7.61437   | YES | YES |
| 96  | a | 639.56  | 1.85278   | YES | YES |
| 97  | a | 640.97  | 0.06323   | YES | YES |
| 98  | a | 642.37  | 2.08273   | YES | YES |
| 99  | a | 643.01  | 0.19840   | YES | YES |
| 100 | a | 649.76  | 19.04930  | YES | YES |
| 101 | a | 656.80  | 42.87087  | YES | YES |
| 102 | a | 661.37  | 2.05033   | YES | YES |
| 103 | a | 675.80  | 6.95210   | YES | YES |
| 104 | a | 696.00  | 74.55103  | YES | YES |
| 105 | a | 709.12  | 6.90535   | YES | YES |
| 106 | a | 733.78  | 2.49785   | YES | YES |
| 107 | a | 745.58  | 0.38735   | YES | YES |
| 108 | a | 746.88  | 17.27350  | YES | YES |
| 109 | a | 758.12  | 33.17639  | YES | YES |
| 110 | a | 763.11  | 0.00662   | YES | YES |
| 111 | a | 779.09  | 18.35166  | YES | YES |
| 112 | a | 782.67  | 0.00224   | YES | YES |
| 113 | a | 785.99  | 57.35848  | YES | YES |
| 114 | a | 825.00  | 16.97418  | YES | YES |
| 115 | a | 847.58  | 6.65555   | YES | YES |
| 116 | a | 867.26  | 11.85474  | YES | YES |
| 117 | a | 876.64  | 4.32848   | YES | YES |
| 118 | a | 880.70  | 117.51715 | YES | YES |
| 119 | a | 913.29  | 0.00233   | YES | YES |
| 120 | a | 931.12  | 3.81835   | YES | YES |
| 121 | a | 941.76  | 1.23803   | YES | YES |
| 122 | a | 967.34  | 75.10439  | YES | YES |
| 123 | a | 968.03  | 1.02903   | YES | YES |
| 124 | a | 970.20  | 197.45129 | YES | YES |
| 125 | a | 972.76  | 2.90539   | YES | YES |
| 126 | a | 975.37  | 15.06481  | YES | YES |
| 127 | a | 976.61  | 173.75522 | YES | YES |
| 128 | a | 980.03  | 7.23603   | YES | YES |
| 129 | a | 1046.43 | 11.65199  | YES | YES |
| 130 | a | 1061.25 | 42.35348  | YES | YES |
| 131 | a | 1070.24 | 0.76401   | YES | YES |
| 132 | a | 1080.29 | 222.64846 | YES | YES |
| 133 | a | 1106.97 | 0.35514   | YES | YES |
| 134 | a | 1124.95 | 5.50557   | YES | YES |
| 135 | a | 1148.55 | 1.23979   | YES | YES |
| 136 | a | 1149.36 | 1.60967   | YES | YES |
| 137 | a | 1152.18 | 2.44547   | YES | YES |
| 138 | a | 1153.57 | 28.03161  | YES | YES |
| 139 | a | 1157.36 | 8.62245   | YES | YES |

|     |   |         |           |     |     |
|-----|---|---------|-----------|-----|-----|
| 140 | a | 1163.40 | 2.81262   | YES | YES |
| 141 | a | 1208.67 | 6.70790   | YES | YES |
| 142 | a | 1233.79 | 2.21302   | YES | YES |
| 143 | a | 1239.38 | 65.30711  | YES | YES |
| 144 | a | 1272.12 | 110.13225 | YES | YES |
| 145 | a | 1272.31 | 131.07585 | YES | YES |
| 146 | a | 1283.58 | 235.20344 | YES | YES |
| 147 | a | 1284.56 | 52.17814  | YES | YES |
| 148 | a | 1338.77 | 0.68057   | YES | YES |
| 149 | a | 1339.22 | 0.93549   | YES | YES |
| 150 | a | 1341.83 | 3.30693   | YES | YES |
| 151 | a | 1342.51 | 4.76644   | YES | YES |
| 152 | a | 1345.39 | 48.83127  | YES | YES |
| 153 | a | 1351.28 | 0.42307   | YES | YES |
| 154 | a | 1368.07 | 0.44664   | YES | YES |
| 155 | a | 1371.09 | 232.52317 | YES | YES |
| 156 | a | 1372.41 | 5.87724   | YES | YES |
| 157 | a | 1377.62 | 84.68234  | YES | YES |
| 158 | a | 1387.70 | 98.24761  | YES | YES |
| 159 | a | 1409.88 | 16.08797  | YES | YES |
| 160 | a | 1445.28 | 86.79820  | YES | YES |
| 161 | a | 1446.95 | 92.72332  | YES | YES |
| 162 | a | 1447.04 | 70.46621  | YES | YES |
| 163 | a | 1449.66 | 199.98893 | YES | YES |
| 164 | a | 1450.95 | 72.91893  | YES | YES |
| 165 | a | 1458.95 | 2.91258   | YES | YES |
| 166 | a | 1463.67 | 147.42780 | YES | YES |
| 167 | a | 1465.79 | 777.77650 | YES | YES |
| 168 | a | 1475.08 | 741.70433 | YES | YES |
| 169 | a | 1510.95 | 33.74957  | YES | YES |
| 170 | a | 1557.76 | 70.74487  | YES | YES |
| 171 | a | 1582.82 | 20.08835  | YES | YES |
| 172 | a | 1582.93 | 15.36759  | YES | YES |
| 173 | a | 1585.43 | 22.68104  | YES | YES |
| 174 | a | 1585.84 | 14.59686  | YES | YES |
| 175 | a | 1599.40 | 36.24642  | YES | YES |
| 176 | a | 1603.29 | 9.89638   | YES | YES |
| 177 | a | 1613.98 | 111.38222 | YES | YES |
| 178 | a | 1614.50 | 77.59587  | YES | YES |
| 179 | a | 1618.62 | 41.49539  | YES | YES |
| 180 | a | 1618.72 | 140.85437 | YES | YES |
| 181 | a | 3089.73 | 0.12467   | YES | YES |
| 182 | a | 3091.50 | 3.49473   | YES | YES |
| 183 | a | 3101.10 | 7.08916   | YES | YES |
| 184 | a | 3101.53 | 13.84569  | YES | YES |
| 185 | a | 3116.80 | 23.29412  | YES | YES |
| 186 | a | 3117.25 | 22.03134  | YES | YES |



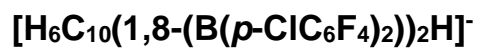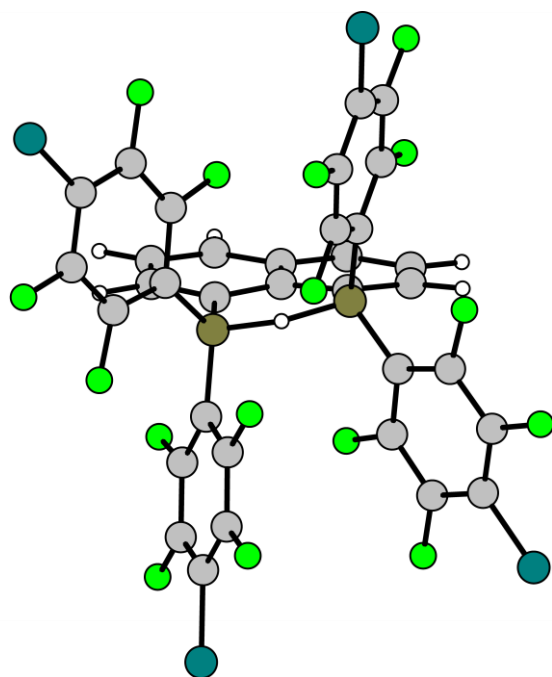

\$coord

|             |             |              |    |
|-------------|-------------|--------------|----|
| -0.00072315 | -0.00010117 | -4.52662487  | c  |
| -0.20972481 | -2.35593282 | -3.18182580  | c  |
| -0.65435271 | -4.55678213 | -4.57102979  | c  |
| -0.78161767 | -4.54920918 | -7.25139743  | c  |
| -0.41087459 | -2.31839850 | -8.57937126  | c  |
| 0.00019689  | -0.00031382 | -7.26430497  | c  |
| 0.41243278  | 2.31752620  | -8.57939615  | c  |
| 0.78239624  | 4.54843012  | -7.25137710  | c  |
| 0.65330297  | 4.55635935  | -4.57109334  | c  |
| 0.20776618  | 2.35579641  | -3.18170606  | c  |
| -0.84768473 | -6.37928452 | -3.57215493  | h  |
| -1.12619314 | -6.33465487 | -8.27455987  | h  |
| -0.43461655 | -2.30099733 | -10.66628046 | h  |
| 0.43792711  | 2.29982755  | -10.66628129 | h  |
| 1.12806948  | 6.33370612  | -8.27445603  | h  |
| 0.84656322  | 6.37897506  | -3.57246680  | h  |
| 0.17848542  | -2.48376252 | -0.16888730  | b  |
| -0.17981820 | 2.48373069  | -0.16847831  | b  |
| 3.02883382  | -3.14642055 | 0.85167487   | c  |
| -2.16425316 | -3.86505076 | 1.29900059   | c  |
| -3.02936119 | 3.14818006  | 0.85361158   | c  |
| 2.16352640  | 3.86346823  | 1.30030208   | c  |
| -1.93235936 | -5.76104956 | 3.15628872   | c  |
| -4.01129891 | -6.95029875 | 4.31255700   | c  |
| -6.47975406 | -6.27571596 | 3.61175571   | c  |
| -6.81043306 | -4.42124678 | 1.73972518   | c  |
| -4.68201000 | -3.28539771 | 0.62825922   | c  |
| 0.35047359  | -6.59743215 | 3.92063170   | f  |
| -3.62781745 | -8.73768020 | 6.07012217   | f  |
| -9.07003686 | -7.72008552 | 5.01360958   | cl |
| -9.13918696 | -3.74840878 | 1.00346164   | f  |
| -5.16883759 | -1.57610095 | -1.18863996  | f  |
| 4.94858510  | -4.27291364 | -0.60839568  | c  |

|              |             |             |    |
|--------------|-------------|-------------|----|
| 7.41750984   | -4.69181969 | 0.29105163  | c  |
| 8.06732303   | -3.99127017 | 2.76482072  | c  |
| 6.20602214   | -2.88580615 | 4.30352828  | c  |
| 3.77153995   | -2.49163066 | 3.32478679  | c  |
| 4.53447219   | -5.03586424 | -2.99872087 | f  |
| 9.14378332   | -5.76196919 | -1.23043094 | f  |
| 11.10137020  | -4.49677322 | 3.90967670  | cl |
| 6.74636748   | -2.22235919 | 6.69094295  | f  |
| 2.07639157   | -1.46466937 | 4.92156963  | f  |
| -3.77388105  | 2.48428932  | 3.32377310  | c  |
| -6.20778696  | 2.87896859  | 4.30368672  | c  |
| -8.06626418  | 3.99563510  | 2.76965195  | c  |
| -7.41416369  | 4.70693752  | 0.29954702  | c  |
| -4.94599426  | 4.28640833  | -0.60137778 | c  |
| -2.08062128  | 1.44828496  | 4.91683951  | f  |
| -6.75015114  | 2.20599441  | 6.68800158  | f  |
| -11.09954920 | 4.50240628  | 3.91602203  | cl |
| -9.13759844  | 5.78919210  | -1.21668941 | f  |
| -4.52880325  | 5.06143474  | -2.98740265 | f  |
| 1.93157442   | 5.75642626  | 3.16073500  | c  |
| 4.01036759   | 6.94404779  | 4.31893058  | c  |
| 6.47889991   | 6.27054960  | 3.61739834  | c  |
| 6.80971562   | 4.41889329  | 1.74261773  | c  |
| 4.68139825   | 3.28520987  | 0.62870635  | c  |
| -0.35126989  | 6.59106953  | 3.92693893  | f  |
| 3.62662761   | 8.72894966  | 6.07894104  | f  |
| 9.06901401   | 7.71254536  | 5.02196604  | cl |
| 9.13853813   | 3.74704232  | 1.00568129  | f  |
| 5.16871274   | 1.57902033  | -1.19097657 | f  |
| -0.00114970  | 0.00009491  | 0.65751167  | h  |

\$vibrational spectrum

| # mode | symmetry | wave number | IR intensity | selection |     |
|--------|----------|-------------|--------------|-----------|-----|
| rules  |          | cm**(-1)    | km/mol       | IR        |     |
| #      |          |             |              |           |     |
| RAMAN  |          |             |              |           |     |
| 1      |          | -0.00       | 0.00000      | -         | -   |
| 2      |          | -0.00       | 0.00000      | -         | -   |
| 3      |          | -0.00       | 0.00000      | -         | -   |
| 4      |          | -0.00       | 0.00000      | -         | -   |
| 5      |          | 0.00        | 0.00000      | -         | -   |
| 6      |          | 0.00        | 0.00000      | -         | -   |
| 7      | a        | 11.17       | 0.01116      | YES       | YES |
| 8      | a        | 12.12       | 0.06211      | YES       | YES |
| 9      | a        | 19.89       | 0.00610      | YES       | YES |
| 10     | a        | 20.87       | 0.00425      | YES       | YES |
| 11     | a        | 22.16       | 0.00427      | YES       | YES |
| 12     | a        | 25.61       | 0.01206      | YES       | YES |
| 13     | a        | 28.09       | 0.02968      | YES       | YES |
| 14     | a        | 35.57       | 0.00777      | YES       | YES |
| 15     | a        | 39.29       | 0.00297      | YES       | YES |
| 16     | a        | 49.07       | 0.04214      | YES       | YES |
| 17     | a        | 55.25       | 0.06895      | YES       | YES |
| 18     | a        | 59.53       | 0.02559      | YES       | YES |
| 19     | a        | 84.36       | 0.00034      | YES       | YES |
| 20     | a        | 93.09       | 0.00820      | YES       | YES |

|    |   |        |          |     |     |
|----|---|--------|----------|-----|-----|
| 21 | a | 94.10  | 0.00611  | YES | YES |
| 22 | a | 98.40  | 0.00622  | YES | YES |
| 23 | a | 100.26 | 0.28522  | YES | YES |
| 24 | a | 118.87 | 0.14836  | YES | YES |
| 25 | a | 119.48 | 0.00583  | YES | YES |
| 26 | a | 121.60 | 0.04316  | YES | YES |
| 27 | a | 123.71 | 0.00200  | YES | YES |
| 28 | a | 129.82 | 0.03076  | YES | YES |
| 29 | a | 130.58 | 0.01607  | YES | YES |
| 30 | a | 134.57 | 0.05667  | YES | YES |
| 31 | a | 142.43 | 0.04051  | YES | YES |
| 32 | a | 143.38 | 0.30620  | YES | YES |
| 33 | a | 146.93 | 0.00174  | YES | YES |
| 34 | a | 148.30 | 0.06622  | YES | YES |
| 35 | a | 148.99 | 0.03653  | YES | YES |
| 36 | a | 170.55 | 1.16218  | YES | YES |
| 37 | a | 185.98 | 0.70459  | YES | YES |
| 38 | a | 191.85 | 0.40178  | YES | YES |
| 39 | a | 193.11 | 0.03354  | YES | YES |
| 40 | a | 193.47 | 0.10470  | YES | YES |
| 41 | a | 194.09 | 0.02170  | YES | YES |
| 42 | a | 201.28 | 1.56747  | YES | YES |
| 43 | a | 214.49 | 0.60001  | YES | YES |
| 44 | a | 217.51 | 0.00648  | YES | YES |
| 45 | a | 221.25 | 0.90833  | YES | YES |
| 46 | a | 221.42 | 0.89817  | YES | YES |
| 47 | a | 249.58 | 0.06749  | YES | YES |
| 48 | a | 255.20 | 0.15287  | YES | YES |
| 49 | a | 278.19 | 0.04185  | YES | YES |
| 50 | a | 278.57 | 0.00506  | YES | YES |
| 51 | a | 280.08 | 0.03242  | YES | YES |
| 52 | a | 280.10 | 0.02349  | YES | YES |
| 53 | a | 306.71 | 0.12191  | YES | YES |
| 54 | a | 307.55 | 0.00093  | YES | YES |
| 55 | a | 308.92 | 0.28866  | YES | YES |
| 56 | a | 310.60 | 0.11733  | YES | YES |
| 57 | a | 322.95 | 1.99828  | YES | YES |
| 58 | a | 324.96 | 0.04419  | YES | YES |
| 59 | a | 325.27 | 0.01941  | YES | YES |
| 60 | a | 325.63 | 0.14842  | YES | YES |
| 61 | a | 345.06 | 0.97661  | YES | YES |
| 62 | a | 350.41 | 0.11520  | YES | YES |
| 63 | a | 357.48 | 4.95481  | YES | YES |
| 64 | a | 361.97 | 0.19583  | YES | YES |
| 65 | a | 393.33 | 0.33114  | YES | YES |
| 66 | a | 393.43 | 0.01004  | YES | YES |
| 67 | a | 395.57 | 0.04114  | YES | YES |
| 68 | a | 395.86 | 0.03482  | YES | YES |
| 69 | a | 414.70 | 0.63728  | YES | YES |
| 70 | a | 420.33 | 0.00229  | YES | YES |
| 71 | a | 421.82 | 17.42942 | YES | YES |
| 72 | a | 432.64 | 0.28838  | YES | YES |
| 73 | a | 433.44 | 0.38034  | YES | YES |
| 74 | a | 434.27 | 0.00972  | YES | YES |
| 75 | a | 434.93 | 0.01551  | YES | YES |
| 76 | a | 449.23 | 3.27498  | YES | YES |
| 77 | a | 459.30 | 1.93977  | YES | YES |

|     |   |         |           |     |     |
|-----|---|---------|-----------|-----|-----|
| 78  | a | 472.65  | 0.74697   | YES | YES |
| 79  | a | 482.97  | 0.19696   | YES | YES |
| 80  | a | 491.38  | 1.65977   | YES | YES |
| 81  | a | 501.45  | 2.56979   | YES | YES |
| 82  | a | 501.62  | 0.60772   | YES | YES |
| 83  | a | 501.78  | 3.09408   | YES | YES |
| 84  | a | 504.19  | 0.44282   | YES | YES |
| 85  | a | 512.15  | 0.38942   | YES | YES |
| 86  | a | 526.72  | 35.96156  | YES | YES |
| 87  | a | 562.02  | 1.07189   | YES | YES |
| 88  | a | 562.63  | 6.66765   | YES | YES |
| 89  | a | 567.59  | 0.57436   | YES | YES |
| 90  | a | 568.01  | 30.01227  | YES | YES |
| 91  | a | 579.96  | 19.22557  | YES | YES |
| 92  | a | 601.00  | 24.68015  | YES | YES |
| 93  | a | 605.28  | 2.76213   | YES | YES |
| 94  | a | 623.12  | 1.27007   | YES | YES |
| 95  | a | 636.29  | 0.91061   | YES | YES |
| 96  | a | 636.48  | 0.28812   | YES | YES |
| 97  | a | 637.92  | 4.79172   | YES | YES |
| 98  | a | 639.11  | 0.69112   | YES | YES |
| 99  | a | 639.34  | 0.91882   | YES | YES |
| 100 | a | 643.73  | 58.89674  | YES | YES |
| 101 | a | 651.74  | 12.46030  | YES | YES |
| 102 | a | 672.24  | 3.00067   | YES | YES |
| 103 | a | 684.19  | 21.02241  | YES | YES |
| 104 | a | 695.60  | 129.18443 | YES | YES |
| 105 | a | 711.50  | 0.47013   | YES | YES |
| 106 | a | 726.86  | 2.26874   | YES | YES |
| 107 | a | 737.62  | 44.15559  | YES | YES |
| 108 | a | 737.85  | 0.92533   | YES | YES |
| 109 | a | 749.53  | 12.42604  | YES | YES |
| 110 | a | 755.26  | 16.13807  | YES | YES |
| 111 | a | 774.74  | 1.37581   | YES | YES |
| 112 | a | 780.72  | 68.09487  | YES | YES |
| 113 | a | 787.14  | 0.06780   | YES | YES |
| 114 | a | 809.09  | 10.00186  | YES | YES |
| 115 | a | 832.83  | 33.18387  | YES | YES |
| 116 | a | 855.38  | 17.81368  | YES | YES |
| 117 | a | 858.57  | 0.01187   | YES | YES |
| 118 | a | 861.96  | 110.49966 | YES | YES |
| 119 | a | 884.78  | 0.00215   | YES | YES |
| 120 | a | 899.49  | 3.39284   | YES | YES |
| 121 | a | 925.22  | 6.01515   | YES | YES |
| 122 | a | 947.64  | 0.36592   | YES | YES |
| 123 | a | 948.09  | 67.57593  | YES | YES |
| 124 | a | 953.58  | 0.56151   | YES | YES |
| 125 | a | 961.03  | 111.84065 | YES | YES |
| 126 | a | 961.86  | 15.69775  | YES | YES |
| 127 | a | 967.51  | 90.26535  | YES | YES |
| 128 | a | 968.12  | 259.41983 | YES | YES |
| 129 | a | 990.99  | 13.88242  | YES | YES |
| 130 | a | 1010.44 | 0.00029   | YES | YES |
| 131 | a | 1018.71 | 0.11871   | YES | YES |
| 132 | a | 1030.61 | 0.47868   | YES | YES |
| 133 | a | 1033.36 | 159.03619 | YES | YES |
| 134 | a | 1071.33 | 2.61732   | YES | YES |

|     |   |         |            |     |     |
|-----|---|---------|------------|-----|-----|
| 135 | a | 1094.67 | 1.44817    | YES | YES |
| 136 | a | 1136.48 | 2.31151    | YES | YES |
| 137 | a | 1137.27 | 0.00388    | YES | YES |
| 138 | a | 1139.88 | 0.79964    | YES | YES |
| 139 | a | 1141.24 | 6.43417    | YES | YES |
| 140 | a | 1142.31 | 0.22208    | YES | YES |
| 141 | a | 1143.13 | 0.12830    | YES | YES |
| 142 | a | 1187.06 | 16.53526   | YES | YES |
| 143 | a | 1206.75 | 5.77958    | YES | YES |
| 144 | a | 1227.16 | 2.74240    | YES | YES |
| 145 | a | 1229.17 | 4.72139    | YES | YES |
| 146 | a | 1245.98 | 30.76685   | YES | YES |
| 147 | a | 1247.62 | 31.58934   | YES | YES |
| 148 | a | 1249.55 | 189.75361  | YES | YES |
| 149 | a | 1251.25 | 9.74713    | YES | YES |
| 150 | a | 1339.19 | 0.29245    | YES | YES |
| 151 | a | 1339.59 | 4.74281    | YES | YES |
| 152 | a | 1340.59 | 0.65474    | YES | YES |
| 153 | a | 1341.87 | 0.24297    | YES | YES |
| 154 | a | 1348.63 | 50.71341   | YES | YES |
| 155 | a | 1351.73 | 1.35141    | YES | YES |
| 156 | a | 1370.08 | 42.55554   | YES | YES |
| 157 | a | 1374.23 | 7.12612    | YES | YES |
| 158 | a | 1374.95 | 78.07778   | YES | YES |
| 159 | a | 1381.66 | 0.28900    | YES | YES |
| 160 | a | 1383.37 | 2.01290    | YES | YES |
| 161 | a | 1411.57 | 0.37887    | YES | YES |
| 162 | a | 1447.82 | 402.46207  | YES | YES |
| 163 | a | 1449.58 | 16.86565   | YES | YES |
| 164 | a | 1449.96 | 119.88255  | YES | YES |
| 165 | a | 1450.73 | 40.78624   | YES | YES |
| 166 | a | 1453.20 | 0.38838    | YES | YES |
| 167 | a | 1453.26 | 2.98018    | YES | YES |
| 168 | a | 1456.29 | 258.17556  | YES | YES |
| 169 | a | 1459.47 | 268.99431  | YES | YES |
| 170 | a | 1466.62 | 869.31556  | YES | YES |
| 171 | a | 1506.18 | 12.87273   | YES | YES |
| 172 | a | 1572.61 | 1.50114    | YES | YES |
| 173 | a | 1589.07 | 6.19168    | YES | YES |
| 174 | a | 1589.21 | 0.70588    | YES | YES |
| 175 | a | 1590.96 | 1.59296    | YES | YES |
| 176 | a | 1592.60 | 13.32665   | YES | YES |
| 177 | a | 1596.37 | 0.11722    | YES | YES |
| 178 | a | 1605.39 | 7.39846    | YES | YES |
| 179 | a | 1605.45 | 37.70379   | YES | YES |
| 180 | a | 1608.99 | 15.07467   | YES | YES |
| 181 | a | 1609.86 | 2.09070    | YES | YES |
| 182 | a | 1610.31 | 20.17792   | YES | YES |
| 183 | a | 1858.35 | 1588.89528 | YES | YES |
| 184 | a | 3060.46 | 0.10853    | YES | YES |
| 185 | a | 3061.04 | 1.35433    | YES | YES |
| 186 | a | 3069.72 | 12.97421   | YES | YES |
| 187 | a | 3070.82 | 51.61824   | YES | YES |
| 188 | a | 3088.23 | 75.19788   | YES | YES |
| 189 | a | 3089.67 | 61.78646   | YES | YES |

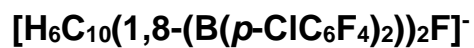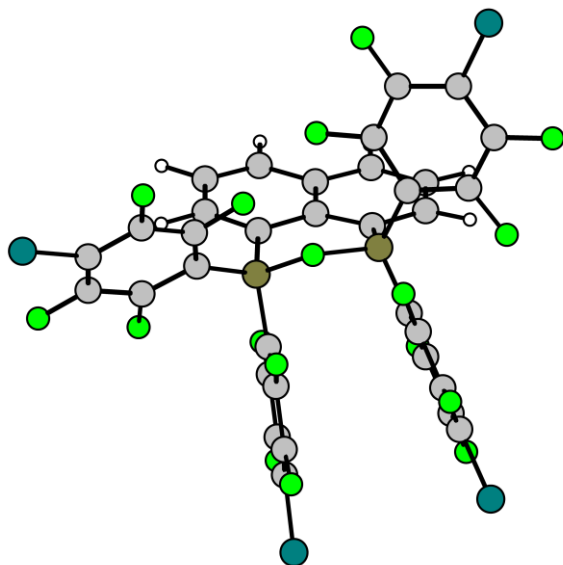

\$coord

|             |             |             |    |
|-------------|-------------|-------------|----|
| 5.47489271  | -0.82587026 | 1.57381925  | c  |
| 3.92783819  | 0.15206379  | -0.35359404 | c  |
| 4.57116839  | -0.61739488 | -2.81842416 | c  |
| 6.60007960  | -2.23295790 | -3.37649049 | c  |
| 8.10428233  | -3.16384691 | -1.39238939 | c  |
| 7.53123831  | -2.44678061 | 1.09810321  | c  |
| 1.58252536  | 2.15189213  | 0.06986810  | b  |
| 2.10484392  | 4.74416289  | -1.55500693 | c  |
| 4.42511892  | 6.01358329  | -1.27216145 | c  |
| 5.07620549  | 8.23238492  | -2.57656747 | c  |
| 3.34391186  | 9.29015855  | -4.28733519 | c  |
| 1.00369273  | 8.08812517  | -4.63749479 | c  |
| 0.42627430  | 5.86955799  | -3.28506643 | c  |
| 6.18625362  | 5.11656589  | 0.35221465  | f  |
| 7.33251507  | 9.32530486  | -2.18924072 | f  |
| 4.08124834  | 12.03437374 | -5.93240940 | c1 |
| -0.68750901 | 9.04432508  | -6.26569848 | f  |
| -1.85454210 | 4.86506878  | -3.76387748 | f  |
| 3.20133167  | 0.20386380  | -4.80950736 | f  |
| 7.10163576  | -2.87529657 | -5.77743526 | f  |
| 10.63945611 | -5.15029081 | -2.01740966 | c1 |
| 8.94612858  | -3.28831361 | 3.02623896  | f  |
| 5.09273824  | -0.21977133 | 4.00869812  | f  |
| 0.67861060  | 2.59337065  | 2.94397594  | c  |
| -0.84437720 | 0.72444755  | 4.23537548  | c  |
| -1.27517317 | 0.98893253  | 6.93234697  | c  |
| -0.32283538 | 3.15583461  | 8.22736095  | c  |
| 1.00082018  | 5.00190125  | 6.92817842  | c  |
| 1.50082540  | 4.69574297  | 4.30821842  | c  |
| -2.64733546 | -0.90993633 | 8.26124355  | c  |
| -3.61403216 | -2.98881763 | 6.98783861  | c  |
| -3.30465437 | -3.18112450 | 4.33565382  | c  |
| -1.96615730 | -1.38535043 | 2.92733051  | c  |

|              |              |             |    |
|--------------|--------------|-------------|----|
| -2.12745735  | -1.59956064  | -0.11236790 | b  |
| -0.70006454  | -3.94739302  | -1.53999203 | c  |
| -0.92728762  | -4.23834223  | -4.17700087 | c  |
| 0.27255656   | -6.16062172  | -5.55657767 | c  |
| 1.81257284   | -7.91386037  | -4.28515379 | c  |
| 2.11975225   | -7.68114029  | -1.65933976 | c  |
| 0.89565039   | -5.71200740  | -0.35267707 | c  |
| -2.38792300  | -2.63966701  | -5.51799154 | f  |
| -0.05601646  | -6.32800107  | -8.06450389 | f  |
| 3.30266556   | -10.32635862 | -5.93434008 | cl |
| 3.59171958   | -9.31128006  | -0.39282923 | f  |
| 1.36728015   | -5.60285062  | 2.14523153  | f  |
| -5.10595900  | -1.21059063  | -0.91255784 | c  |
| -6.71499056  | -3.20485603  | -1.61185593 | c  |
| -9.30125028  | -2.89813223  | -2.13380013 | c  |
| -10.40129784 | -0.49087279  | -1.93389294 | c  |
| -8.87659497  | 1.55326600   | -1.19201449 | c  |
| -6.29932473  | 1.15752544   | -0.67841986 | c  |
| -5.82725792  | -5.59865271  | -1.78410249 | f  |
| -5.00186244  | 3.18601979   | 0.12864207  | f  |
| -9.87998630  | 3.86705937   | -0.93718947 | f  |
| -13.59505403 | -0.05371626  | -2.56158754 | cl |
| -10.70845666 | -4.90109806  | -2.80195890 | f  |
| 2.63470679   | 6.16048073   | 3.35616372  | h  |
| 1.70687328   | 6.69354685   | 7.92377958  | h  |
| -0.67318844  | 3.33153861   | 10.27747022 | h  |
| -2.93450728  | -0.68697533  | 10.31633642 | h  |
| -4.66958889  | -4.46249169  | 8.02017997  | h  |
| -4.18964900  | -4.79417311  | 3.34971700  | h  |
| -0.74307961  | 0.80729647   | -1.28372337 | f  |

\$vibrational spectrum

| #     | mode | symmetry | wave number | IR intensity | selection |     |
|-------|------|----------|-------------|--------------|-----------|-----|
| rules |      |          | cm**(-1)    | km/mol       | IR        |     |
| #     |      |          |             |              |           |     |
| RAMAN |      |          |             |              |           |     |
| 1     |      |          | -0.00       | 0.00000      | -         | -   |
| 2     |      |          | 0.00        | 0.00000      | -         | -   |
| 3     |      |          | 0.00        | 0.00000      | -         | -   |
| 4     |      |          | 0.00        | 0.00000      | -         | -   |
| 5     |      |          | 0.00        | 0.00000      | -         | -   |
| 6     |      |          | 0.00        | 0.00000      | -         | -   |
| 7     |      | a        | 12.99       | 0.00444      | YES       | YES |
| 8     |      | a        | 17.24       | 0.00758      | YES       | YES |
| 9     |      | a        | 19.93       | 0.00628      | YES       | YES |
| 10    |      | a        | 21.49       | 0.01333      | YES       | YES |
| 11    |      | a        | 24.11       | 0.04271      | YES       | YES |
| 12    |      | a        | 26.28       | 0.03068      | YES       | YES |
| 13    |      | a        | 32.32       | 0.00176      | YES       | YES |
| 14    |      | a        | 32.83       | 0.06942      | YES       | YES |
| 15    |      | a        | 33.63       | 0.01103      | YES       | YES |
| 16    |      | a        | 46.70       | 0.06728      | YES       | YES |
| 17    |      | a        | 51.16       | 0.03400      | YES       | YES |
| 18    |      | a        | 54.22       | 0.02413      | YES       | YES |
| 19    |      | a        | 84.15       | 0.00791      | YES       | YES |
| 20    |      | a        | 89.40       | 0.05099      | YES       | YES |

|    |   |        |         |     |     |
|----|---|--------|---------|-----|-----|
| 21 | a | 94.64  | 0.04097 | YES | YES |
| 22 | a | 96.00  | 0.06755 | YES | YES |
| 23 | a | 99.82  | 0.03708 | YES | YES |
| 24 | a | 117.99 | 0.04512 | YES | YES |
| 25 | a | 122.65 | 0.02712 | YES | YES |
| 26 | a | 123.98 | 0.01773 | YES | YES |
| 27 | a | 124.72 | 0.01038 | YES | YES |
| 28 | a | 126.75 | 0.11936 | YES | YES |
| 29 | a | 129.74 | 0.01227 | YES | YES |
| 30 | a | 137.98 | 0.00222 | YES | YES |
| 31 | a | 140.41 | 0.01377 | YES | YES |
| 32 | a | 143.01 | 0.01465 | YES | YES |
| 33 | a | 145.02 | 0.11969 | YES | YES |
| 34 | a | 148.65 | 0.03943 | YES | YES |
| 35 | a | 150.35 | 0.05521 | YES | YES |
| 36 | a | 161.09 | 0.41296 | YES | YES |
| 37 | a | 176.32 | 0.95550 | YES | YES |
| 38 | a | 191.63 | 0.09783 | YES | YES |
| 39 | a | 192.77 | 0.00294 | YES | YES |
| 40 | a | 193.24 | 0.03340 | YES | YES |
| 41 | a | 193.45 | 0.01972 | YES | YES |
| 42 | a | 202.89 | 1.06765 | YES | YES |
| 43 | a | 213.88 | 0.50448 | YES | YES |
| 44 | a | 216.54 | 0.85224 | YES | YES |
| 45 | a | 221.64 | 1.57735 | YES | YES |
| 46 | a | 224.89 | 0.03243 | YES | YES |
| 47 | a | 240.67 | 0.07853 | YES | YES |
| 48 | a | 246.16 | 1.15845 | YES | YES |
| 49 | a | 274.79 | 0.92141 | YES | YES |
| 50 | a | 276.68 | 0.01675 | YES | YES |
| 51 | a | 278.81 | 0.39151 | YES | YES |
| 52 | a | 279.22 | 0.01237 | YES | YES |
| 53 | a | 281.01 | 0.27407 | YES | YES |
| 54 | a | 304.90 | 0.02131 | YES | YES |
| 55 | a | 305.82 | 0.14690 | YES | YES |
| 56 | a | 306.18 | 0.20198 | YES | YES |
| 57 | a | 309.55 | 0.09278 | YES | YES |
| 58 | a | 322.18 | 1.76095 | YES | YES |
| 59 | a | 322.92 | 0.05779 | YES | YES |
| 60 | a | 324.24 | 1.24654 | YES | YES |
| 61 | a | 325.13 | 0.34375 | YES | YES |
| 62 | a | 338.60 | 0.66849 | YES | YES |
| 63 | a | 352.01 | 0.09148 | YES | YES |
| 64 | a | 359.27 | 1.96509 | YES | YES |
| 65 | a | 366.42 | 1.67812 | YES | YES |
| 66 | a | 393.08 | 1.86971 | YES | YES |
| 67 | a | 394.83 | 0.51110 | YES | YES |
| 68 | a | 394.96 | 0.28238 | YES | YES |
| 69 | a | 395.53 | 1.03796 | YES | YES |
| 70 | a | 397.41 | 0.13877 | YES | YES |
| 71 | a | 413.55 | 0.26362 | YES | YES |
| 72 | a | 427.43 | 1.34749 | YES | YES |
| 73 | a | 431.51 | 0.40309 | YES | YES |
| 74 | a | 432.14 | 0.06026 | YES | YES |
| 75 | a | 432.80 | 0.22066 | YES | YES |
| 76 | a | 432.99 | 1.15920 | YES | YES |
| 77 | a | 436.48 | 1.33013 | YES | YES |



|     |   |         |           |     |     |
|-----|---|---------|-----------|-----|-----|
| 78  | a | 444.50  | 11.98627  | YES | YES |
| 79  | a | 459.07  | 3.01237   | YES | YES |
| 80  | a | 468.72  | 0.22107   | YES | YES |
| 81  | a | 471.55  | 16.01118  | YES | YES |
| 82  | a | 484.10  | 17.82893  | YES | YES |
| 83  | a | 500.65  | 1.39432   | YES | YES |
| 84  | a | 501.47  | 1.26246   | YES | YES |
| 85  | a | 502.06  | 1.09292   | YES | YES |
| 86  | a | 502.26  | 1.10157   | YES | YES |
| 87  | a | 511.67  | 0.18580   | YES | YES |
| 88  | a | 532.34  | 10.84030  | YES | YES |
| 89  | a | 560.17  | 41.89839  | YES | YES |
| 90  | a | 566.80  | 69.61352  | YES | YES |
| 91  | a | 568.75  | 19.95779  | YES | YES |
| 92  | a | 575.51  | 4.39874   | YES | YES |
| 93  | a | 576.96  | 20.70865  | YES | YES |
| 94  | a | 583.45  | 26.51358  | YES | YES |
| 95  | a | 609.63  | 98.25296  | YES | YES |
| 96  | a | 623.51  | 52.92834  | YES | YES |
| 97  | a | 631.08  | 13.70421  | YES | YES |
| 98  | a | 636.27  | 0.87456   | YES | YES |
| 99  | a | 638.80  | 0.96359   | YES | YES |
| 100 | a | 640.31  | 6.41558   | YES | YES |
| 101 | a | 643.57  | 0.74552   | YES | YES |
| 102 | a | 645.50  | 9.94728   | YES | YES |
| 103 | a | 657.12  | 1.23653   | YES | YES |
| 104 | a | 672.72  | 56.76957  | YES | YES |
| 105 | a | 683.76  | 53.47344  | YES | YES |
| 106 | a | 702.94  | 54.76648  | YES | YES |
| 107 | a | 704.70  | 45.04128  | YES | YES |
| 108 | a | 719.98  | 72.29691  | YES | YES |
| 109 | a | 727.27  | 12.07159  | YES | YES |
| 110 | a | 738.78  | 29.02222  | YES | YES |
| 111 | a | 747.16  | 20.76241  | YES | YES |
| 112 | a | 750.15  | 15.69696  | YES | YES |
| 113 | a | 776.32  | 43.65442  | YES | YES |
| 114 | a | 778.87  | 28.26581  | YES | YES |
| 115 | a | 784.24  | 1.55395   | YES | YES |
| 116 | a | 804.21  | 4.01213   | YES | YES |
| 117 | a | 821.77  | 27.19274  | YES | YES |
| 118 | a | 838.00  | 25.05621  | YES | YES |
| 119 | a | 853.20  | 16.89851  | YES | YES |
| 120 | a | 857.52  | 3.59582   | YES | YES |
| 121 | a | 869.17  | 43.40278  | YES | YES |
| 122 | a | 878.94  | 1.95600   | YES | YES |
| 123 | a | 897.19  | 1.03004   | YES | YES |
| 124 | a | 929.82  | 9.50448   | YES | YES |
| 125 | a | 947.44  | 0.30361   | YES | YES |
| 126 | a | 951.45  | 92.13292  | YES | YES |
| 127 | a | 954.86  | 2.51312   | YES | YES |
| 128 | a | 960.38  | 59.84603  | YES | YES |
| 129 | a | 965.98  | 57.79130  | YES | YES |
| 130 | a | 968.33  | 205.02371 | YES | YES |
| 131 | a | 969.36  | 150.29378 | YES | YES |
| 132 | a | 999.27  | 61.96601  | YES | YES |
| 133 | a | 1011.96 | 81.94026  | YES | YES |
| 134 | a | 1032.13 | 87.96969  | YES | YES |

|     |   |         |           |     |     |
|-----|---|---------|-----------|-----|-----|
| 135 | a | 1036.11 | 3.77370   | YES | YES |
| 136 | a | 1079.79 | 8.74960   | YES | YES |
| 137 | a | 1096.06 | 2.37981   | YES | YES |
| 138 | a | 1134.76 | 1.23618   | YES | YES |
| 139 | a | 1136.20 | 1.05712   | YES | YES |
| 140 | a | 1139.13 | 0.63702   | YES | YES |
| 141 | a | 1140.52 | 7.22427   | YES | YES |
| 142 | a | 1142.06 | 0.12145   | YES | YES |
| 143 | a | 1144.57 | 10.68183  | YES | YES |
| 144 | a | 1205.19 | 0.42576   | YES | YES |
| 145 | a | 1224.04 | 2.51722   | YES | YES |
| 146 | a | 1229.65 | 14.67197  | YES | YES |
| 147 | a | 1243.00 | 89.32597  | YES | YES |
| 148 | a | 1246.87 | 68.76673  | YES | YES |
| 149 | a | 1247.54 | 18.95778  | YES | YES |
| 150 | a | 1253.59 | 166.04093 | YES | YES |
| 151 | a | 1340.19 | 0.49040   | YES | YES |
| 152 | a | 1342.59 | 2.12678   | YES | YES |
| 153 | a | 1345.68 | 0.89985   | YES | YES |
| 154 | a | 1346.41 | 1.41128   | YES | YES |
| 155 | a | 1347.83 | 10.97729  | YES | YES |
| 156 | a | 1352.00 | 14.78702  | YES | YES |
| 157 | a | 1372.76 | 3.45945   | YES | YES |
| 158 | a | 1376.37 | 1.85261   | YES | YES |
| 159 | a | 1378.91 | 14.41605  | YES | YES |
| 160 | a | 1380.40 | 12.55398  | YES | YES |
| 161 | a | 1383.63 | 21.40334  | YES | YES |
| 162 | a | 1413.26 | 4.21100   | YES | YES |
| 163 | a | 1445.72 | 25.10334  | YES | YES |
| 164 | a | 1447.71 | 168.07568 | YES | YES |
| 165 | a | 1449.30 | 16.90302  | YES | YES |
| 166 | a | 1450.33 | 91.55143  | YES | YES |
| 167 | a | 1451.41 | 23.61457  | YES | YES |
| 168 | a | 1455.83 | 282.56240 | YES | YES |
| 169 | a | 1460.00 | 133.82365 | YES | YES |
| 170 | a | 1464.91 | 226.10463 | YES | YES |
| 171 | a | 1468.19 | 933.52946 | YES | YES |
| 172 | a | 1509.40 | 5.06629   | YES | YES |
| 173 | a | 1575.21 | 0.85576   | YES | YES |
| 174 | a | 1590.80 | 7.69361   | YES | YES |
| 175 | a | 1592.43 | 4.14121   | YES | YES |
| 176 | a | 1593.35 | 15.06368  | YES | YES |
| 177 | a | 1593.93 | 1.74288   | YES | YES |
| 178 | a | 1599.29 | 1.38640   | YES | YES |
| 179 | a | 1609.42 | 14.38387  | YES | YES |
| 180 | a | 1610.22 | 40.14921  | YES | YES |
| 181 | a | 1610.87 | 11.85343  | YES | YES |
| 182 | a | 1611.62 | 12.16577  | YES | YES |
| 183 | a | 1612.43 | 10.06692  | YES | YES |
| 184 | a | 3062.07 | 1.02423   | YES | YES |
| 185 | a | 3064.50 | 3.57568   | YES | YES |
| 186 | a | 3070.91 | 29.51671  | YES | YES |
| 187 | a | 3084.21 | 50.89254  | YES | YES |
| 188 | a | 3090.80 | 63.43997  | YES | YES |
| 189 | a | 3102.99 | 31.14814  | YES | YES |

1. H. Böhler, N. Trapp, D. Himmel, M. Schleep and I. Krossing, *Dalton Trans.*, 2015, **44**, 7489.
2. L. A. Curtiss, K. Raghavachari, P. C. Redfern, V. Rassolov, J. A. Pople, *J. Chem. Phys.*, 1998, **109**, 7764.
3. A. D. Becke, *Phys. Rev. A*, 1988, **38**, 3098.
4. J. P. Perdew, *Phys. Rev. B: Condens. Matter*, 1986, **33**, 8822.
5. J. P. Perdew, *Phys. Rev. B: Condens. Matter*, 1986, **34**, 7406.
6. A. Schäfer, H. Horn and R. Ahlrichs, *J. Chem. Phys.*, 1992, **97**, 2571.
7. R. Ahlrichs, M. Bar, M. Haser, H. Horn, C. Kolmel, *Chem. Phys. Lett.*, 1989, **162**, 165.
8. O. Treutler, R. Ahlrichs. *J. Chem. Phys.*, 1995, **102**, 346.

**Selected distances and angles of the calculated ions [7-H]<sup>-</sup>, [7-F]<sup>-</sup>, [8-H]<sup>-</sup>, [8-F]<sup>-</sup>, [9-H]<sup>-</sup> and [9-F]<sup>-</sup>**

**Table S9.** Selected distances [Å] and angles [°] derived from the above described quantum-chemical calculations. X = H or F.

|                         | [7-H] <sup>-</sup> | [7-F] <sup>-</sup> | [8-H] <sup>-</sup> | [8-F] <sup>-</sup> | [9-H] <sup>-</sup> | [9-F] <sup>-</sup> |
|-------------------------|--------------------|--------------------|--------------------|--------------------|--------------------|--------------------|
| $r_{B-X}$               | 1.238              | 1.425              | 1.414/1.400        | 1.608/1.607        | 1.388/1.389        | 1.595/1.592        |
| $r_{B...B}$             | -                  | -                  | 2.458              | 2.709              | 2.636              | 2.794              |
| $r_{C(ipso)...C(ipso)}$ | -                  | -                  | 1.417              | 1.423              | 2.503              | 2.528              |
| $r_{C(para)...C(para)}$ | -                  | -                  | 1.408              | 1.407              | 2.492              | 2.478              |
| $\angle_{B,X,B}$        | -                  | -                  | 121.7              | 114.9              | 143.3              | 122.5              |
